# Supplementary material
Source: PubMed Central journal article supplement (PMC6641695)
Supplement: ao8b00159_si_001.pdf [file ao8b00159_si_001.pdf]

## Supporting Information

# **A Simple and Versatile Method for the Formation of Acetals/ketals Using Trace Conventional Acids**

Jian-Lian Dong<sup>†</sup>, Li-Si-Han Yu<sup>†</sup>, Jian-Wu Xie<sup>†,\*</sup>

<sup>†</sup>Department of Chemistry and Life Science, Zhejiang Normal University, Jinhua 321004, P. R.

China; E-mail: xiejw@zjnu.cn

**Contents <sup>1</sup>H and <sup>13</sup>C NMR Copies.....S2-S54**

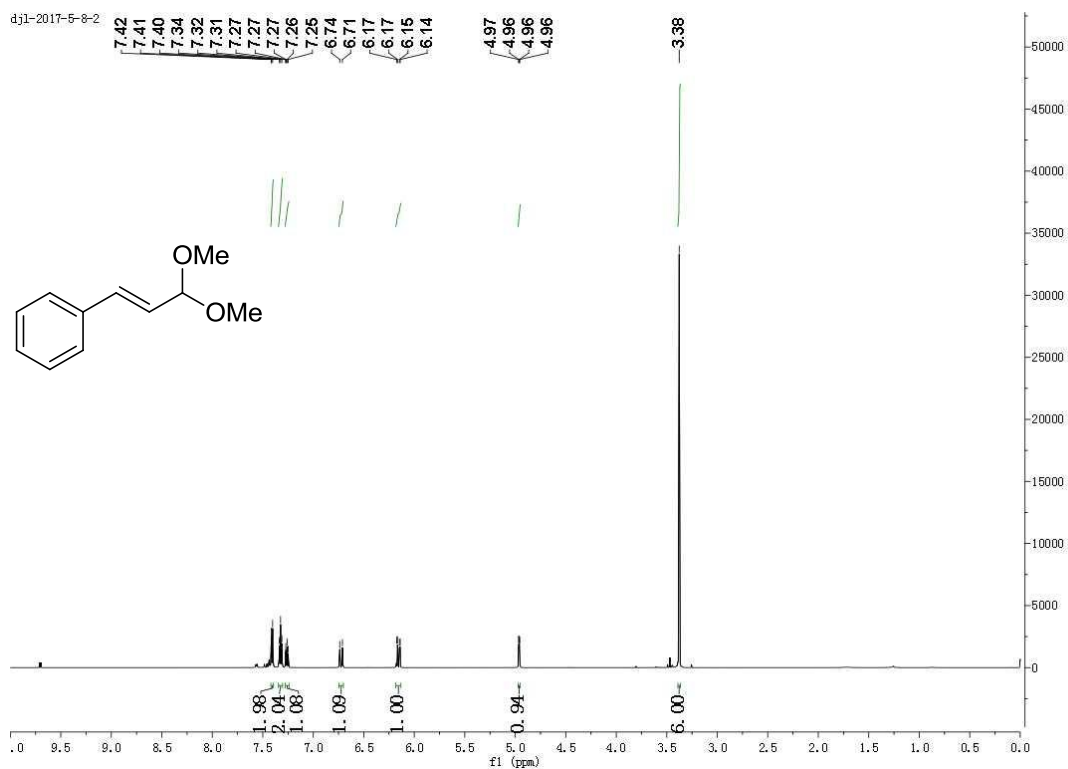

**Figure S1:**  $^1\text{H}$  NMR (600 MHz,  $\text{CDCl}_3$ ) of compound **2a**

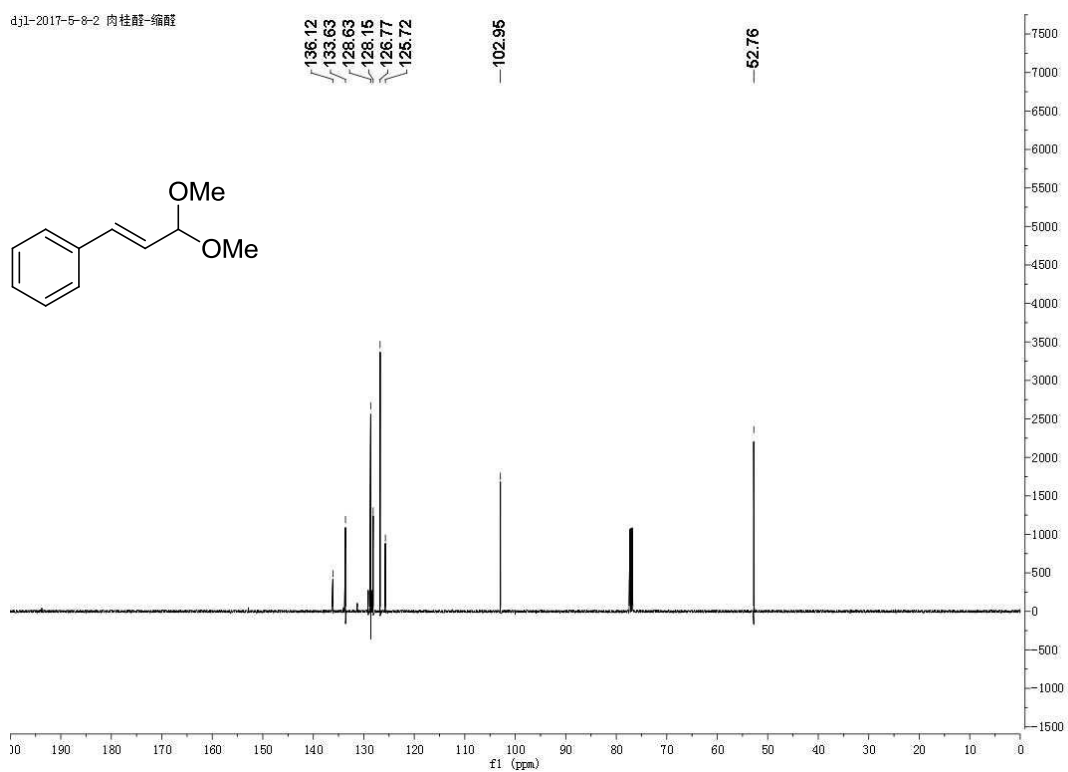

**Figure S2:**  $^{13}\text{C}$  NMR (151 MHz,  $\text{CDCl}_3$ ) of compound **2a**

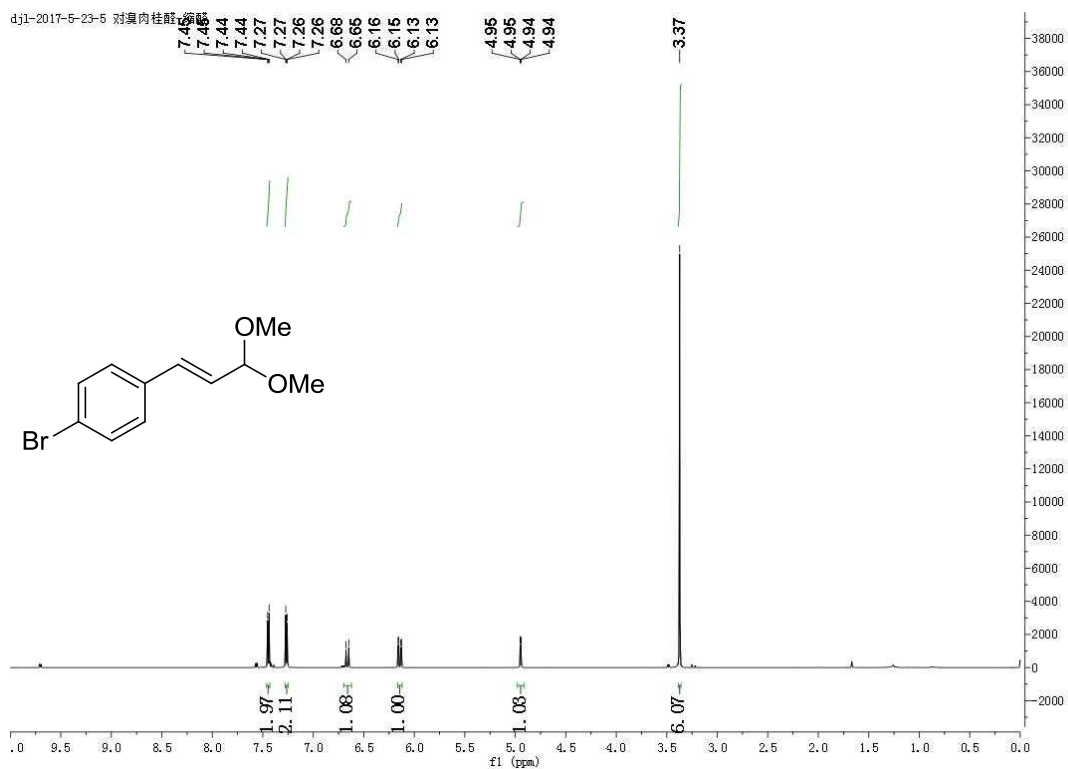

**Figure S3:**  $^1\text{H}$  NMR (600 MHz,  $\text{CDCl}_3$ ) of compound **2b**

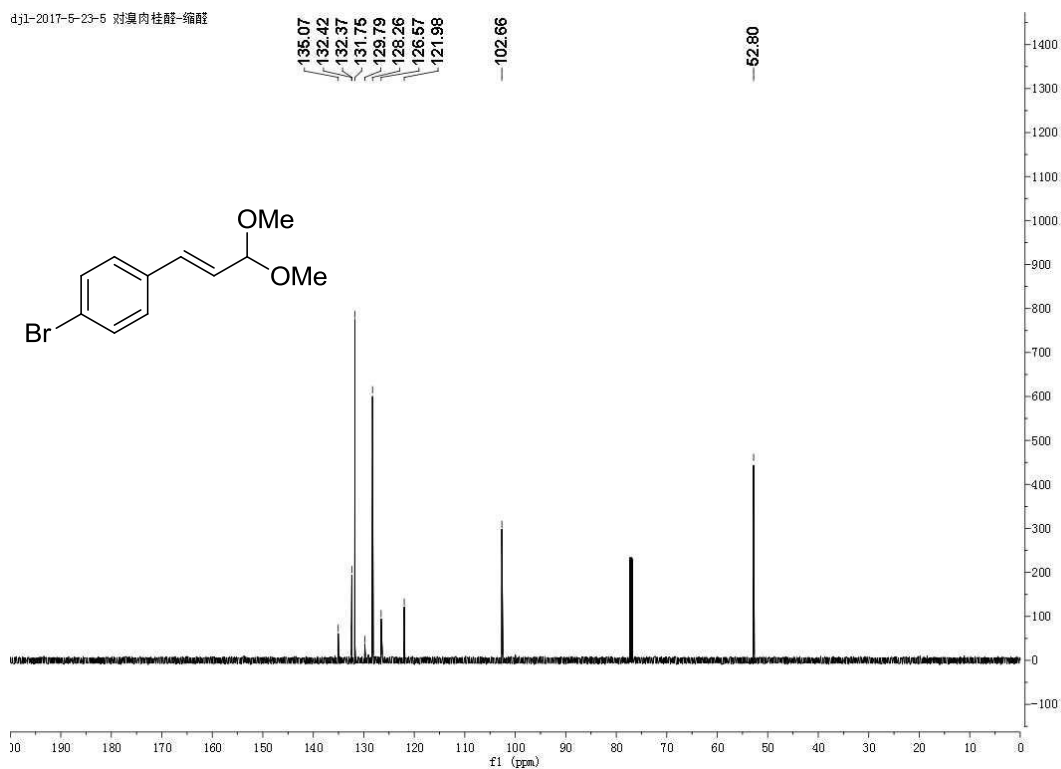

**Figure S4:**  $^{13}\text{C}$  NMR (151 MHz,  $\text{CDCl}_3$ ) of compound **2b**

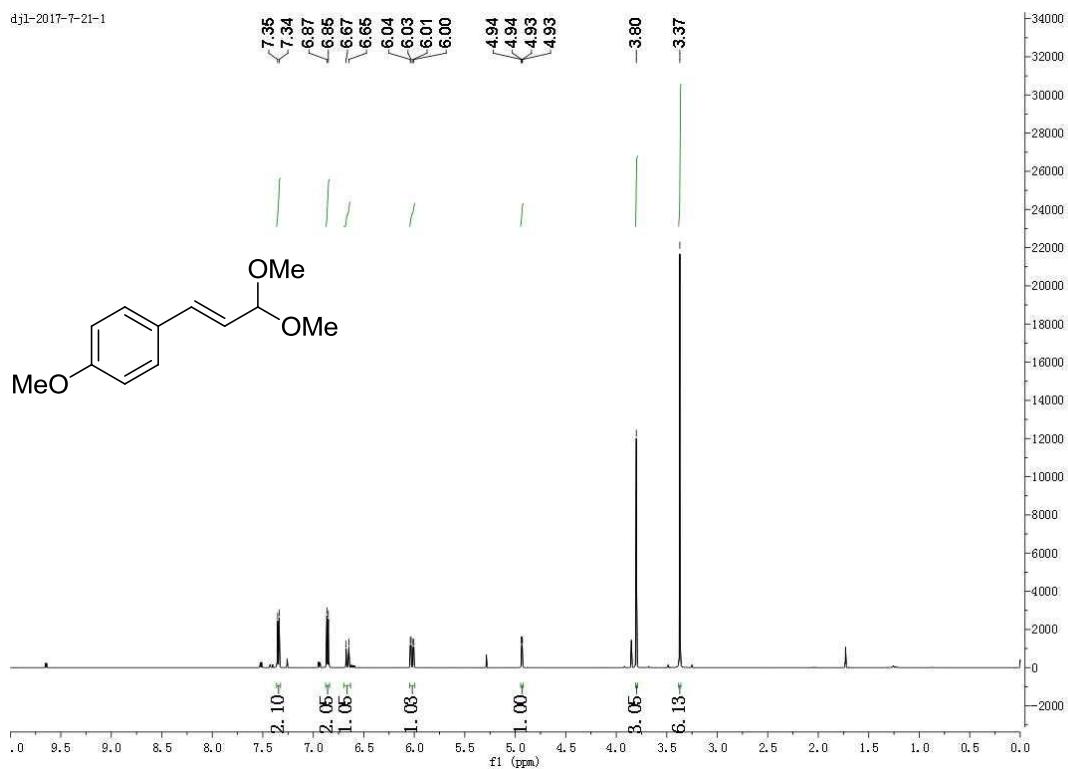

**Figure S5:**  $^1\text{H}$  NMR (600 MHz,  $\text{CDCl}_3$ ) of compound **2c**

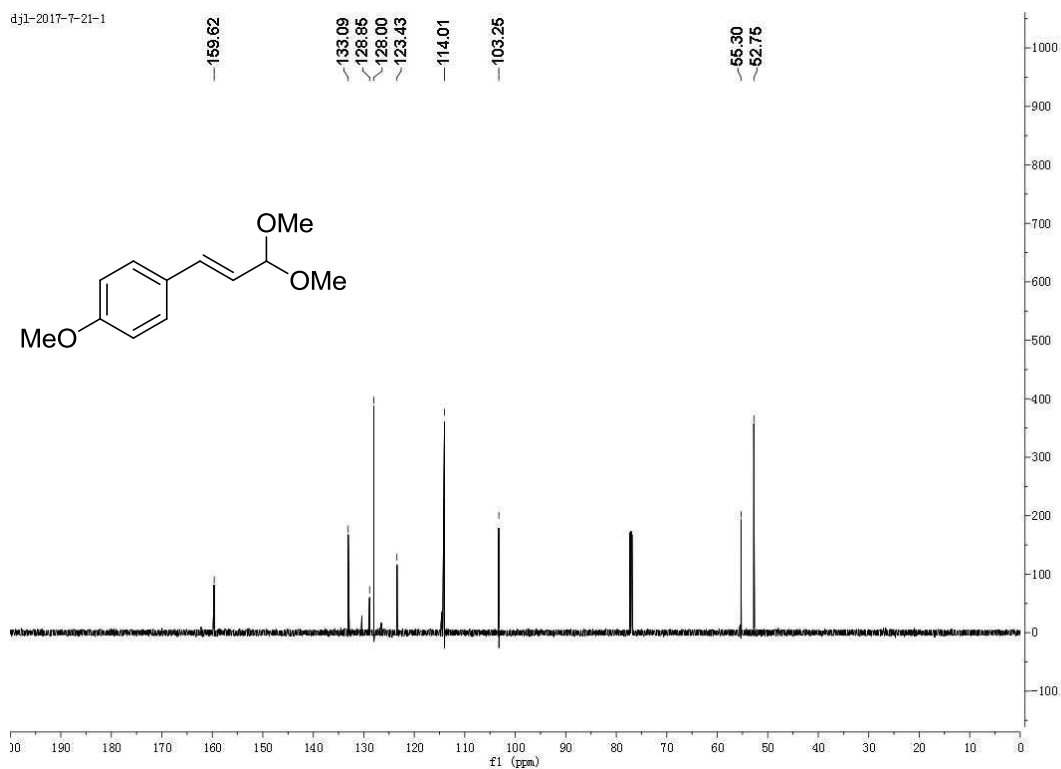

**Figure S6:**  $^{13}\text{C}$  NMR (151 MHz,  $\text{CDCl}_3$ ) of compound **2c**

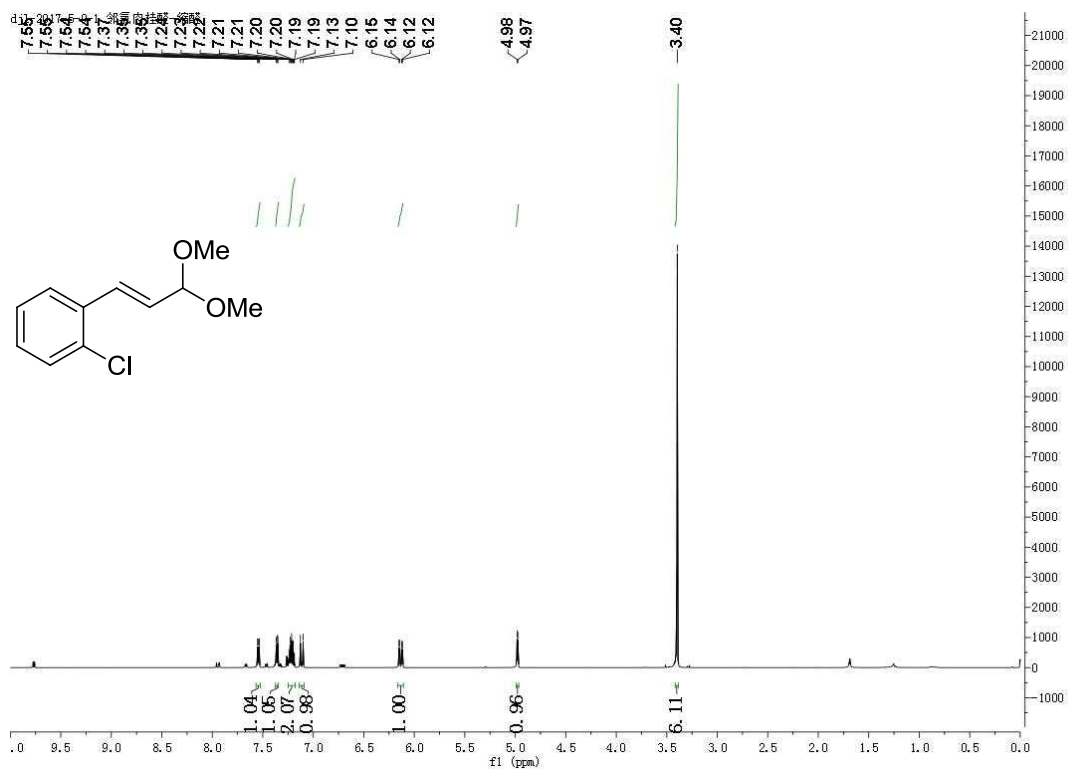

Figure S7:  $^1\text{H}$  NMR (600 MHz,  $\text{CDCl}_3$ ) of compound 2d

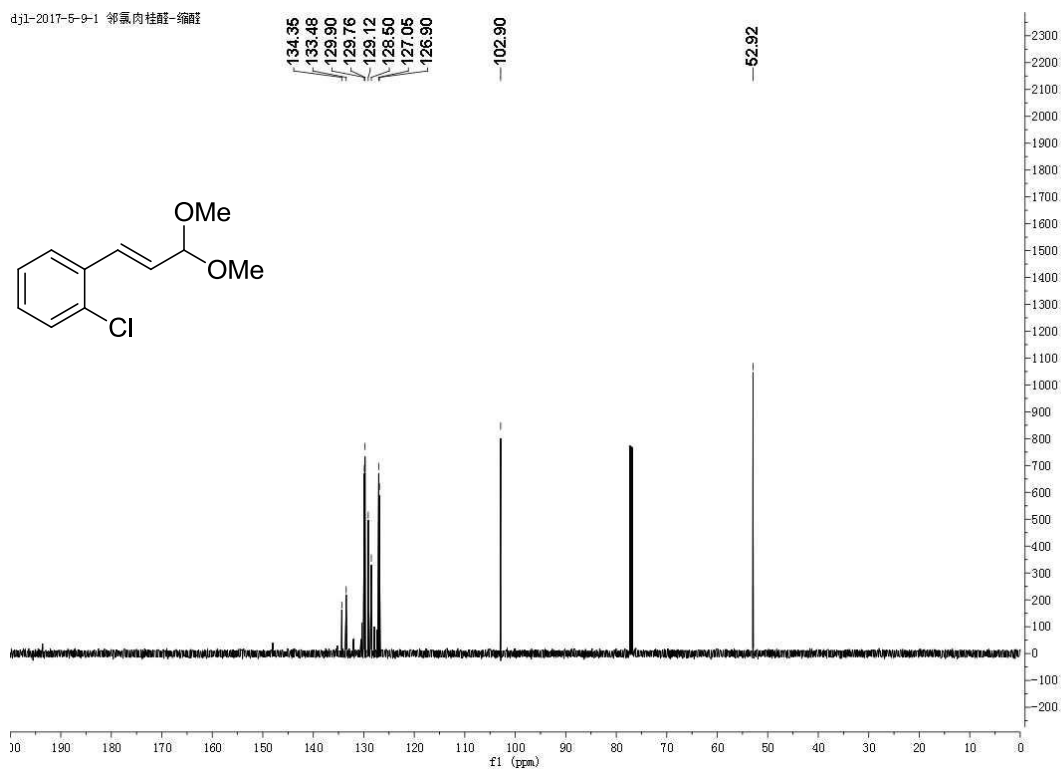

Figure S8:  $^{13}\text{C}$  NMR (151 MHz,  $\text{CDCl}_3$ ) of compound 2d

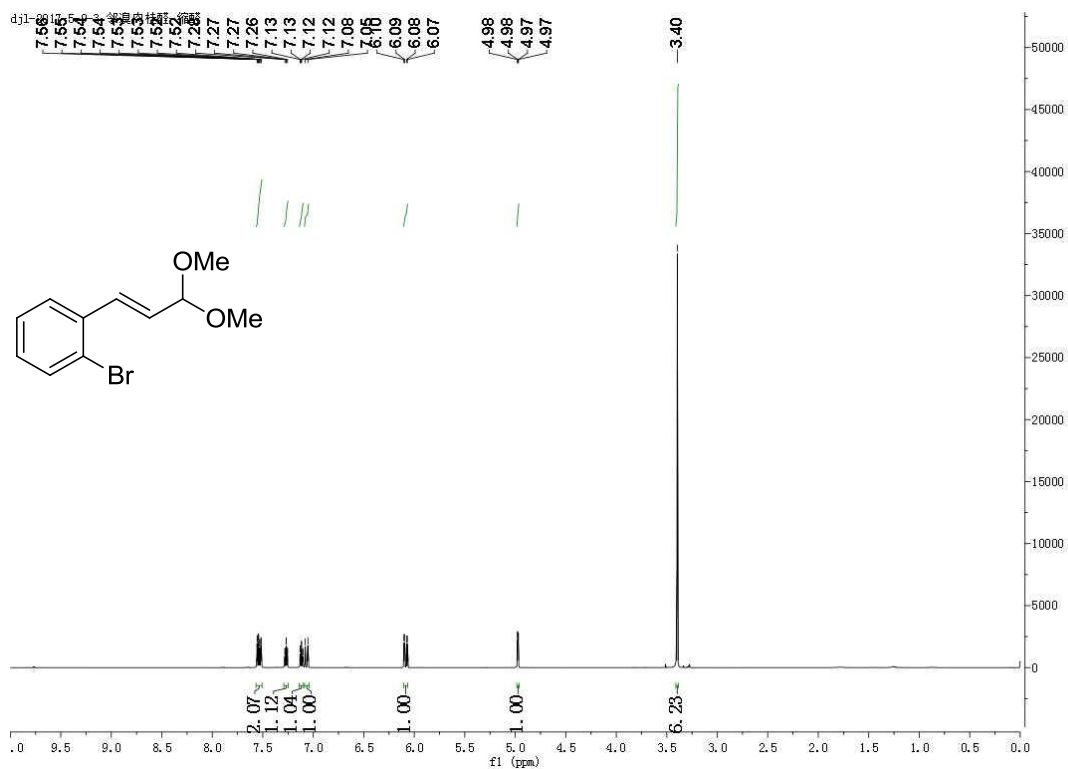

Figure S9: <sup>1</sup>H NMR (600 MHz, CDCl<sub>3</sub>) of compound 2e

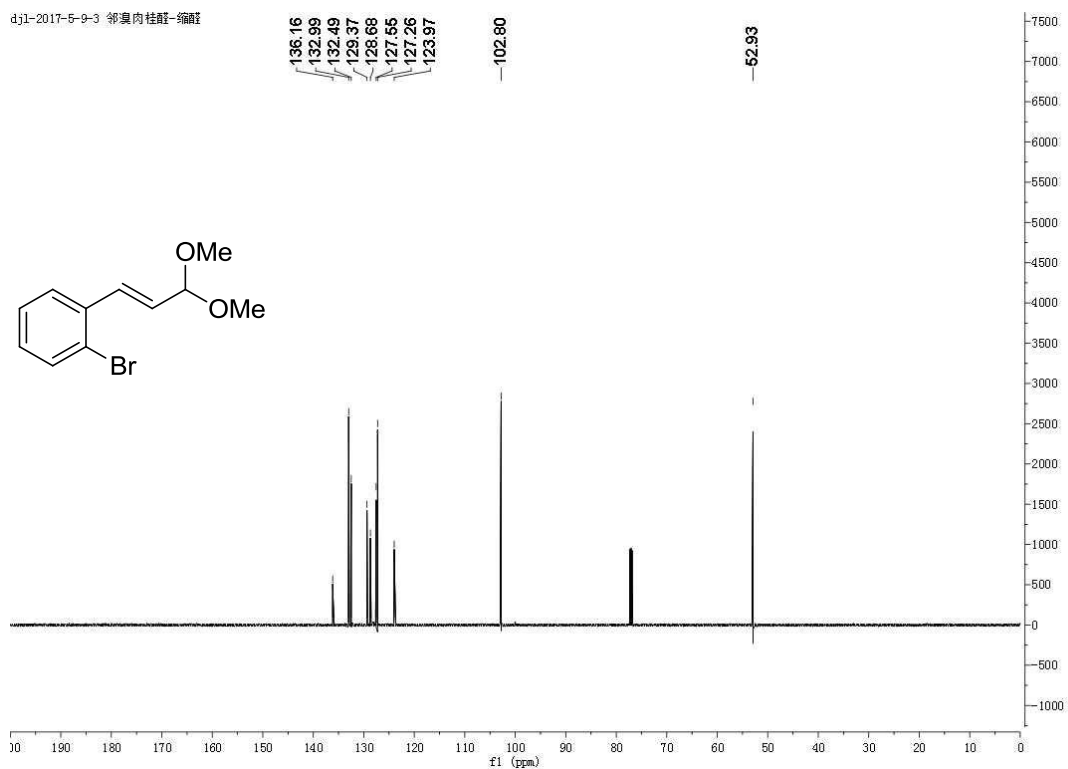

Figure S10: <sup>13</sup>C NMR (151 MHz, CDCl<sub>3</sub>) of compound 2e

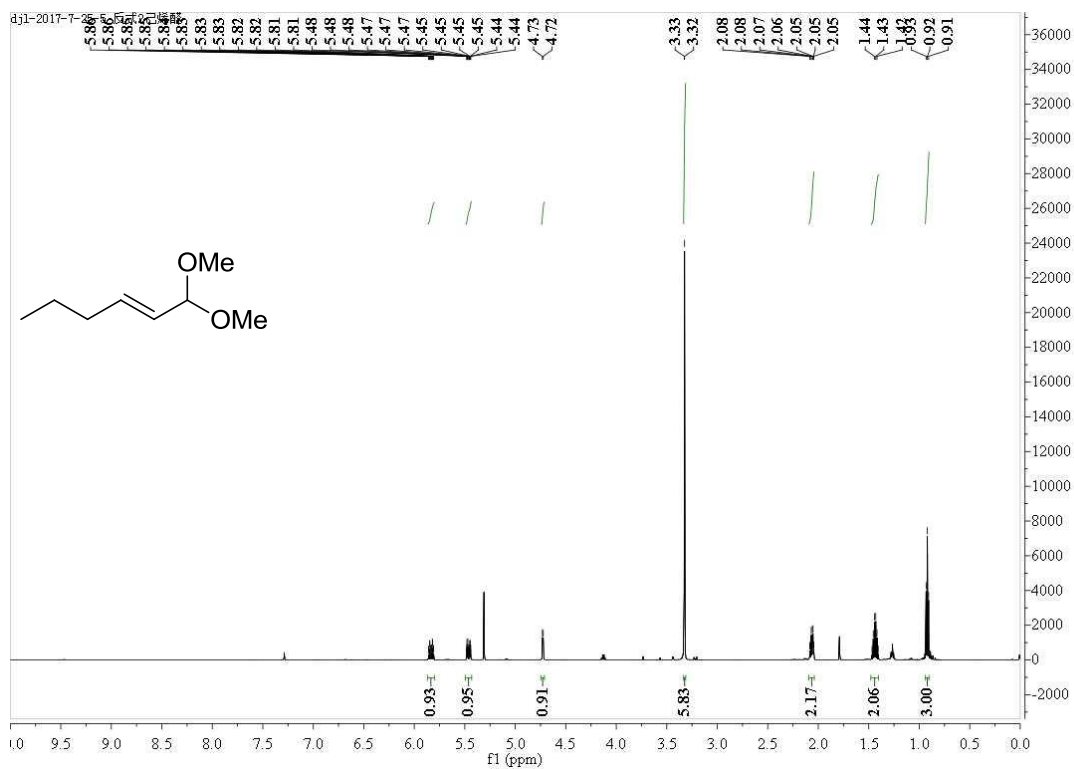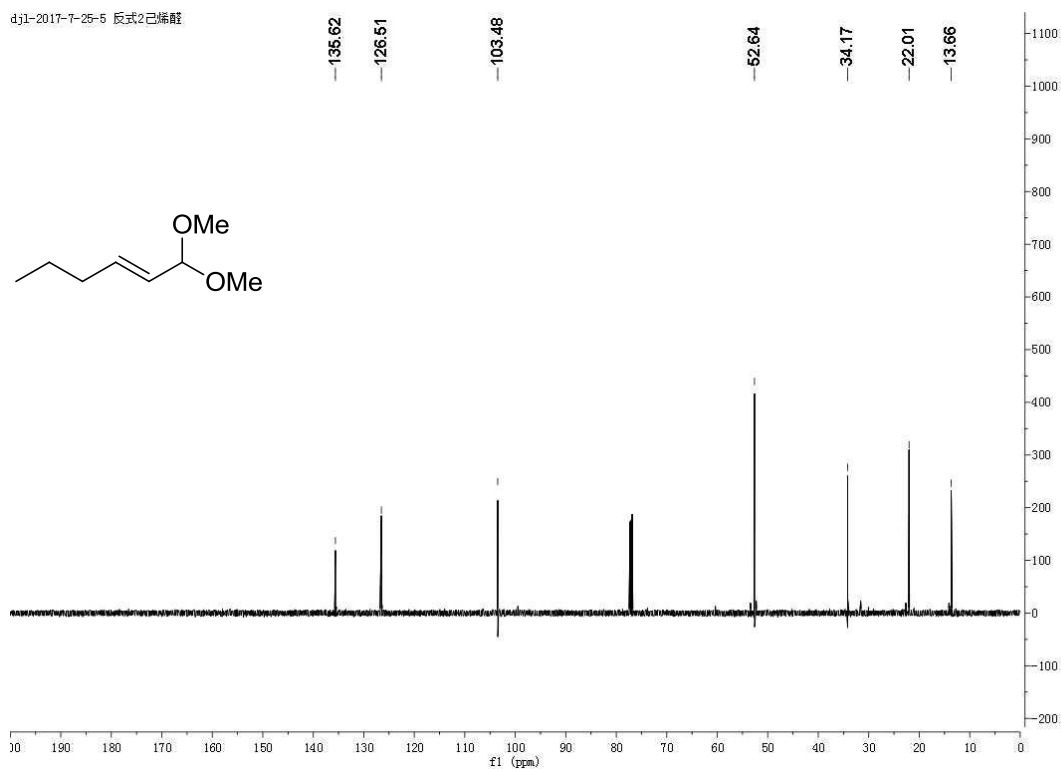

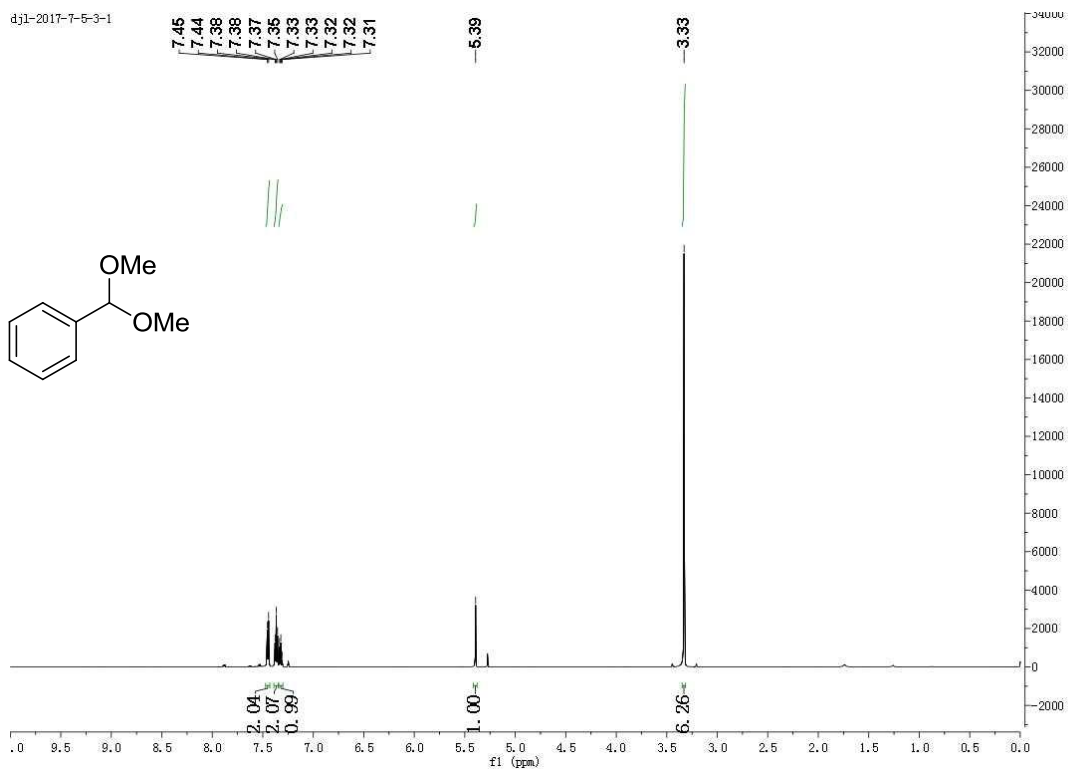

**Figure S13:**  $^1\text{H}$  NMR (600 MHz,  $\text{CDCl}_3$ ) of compound **2g**

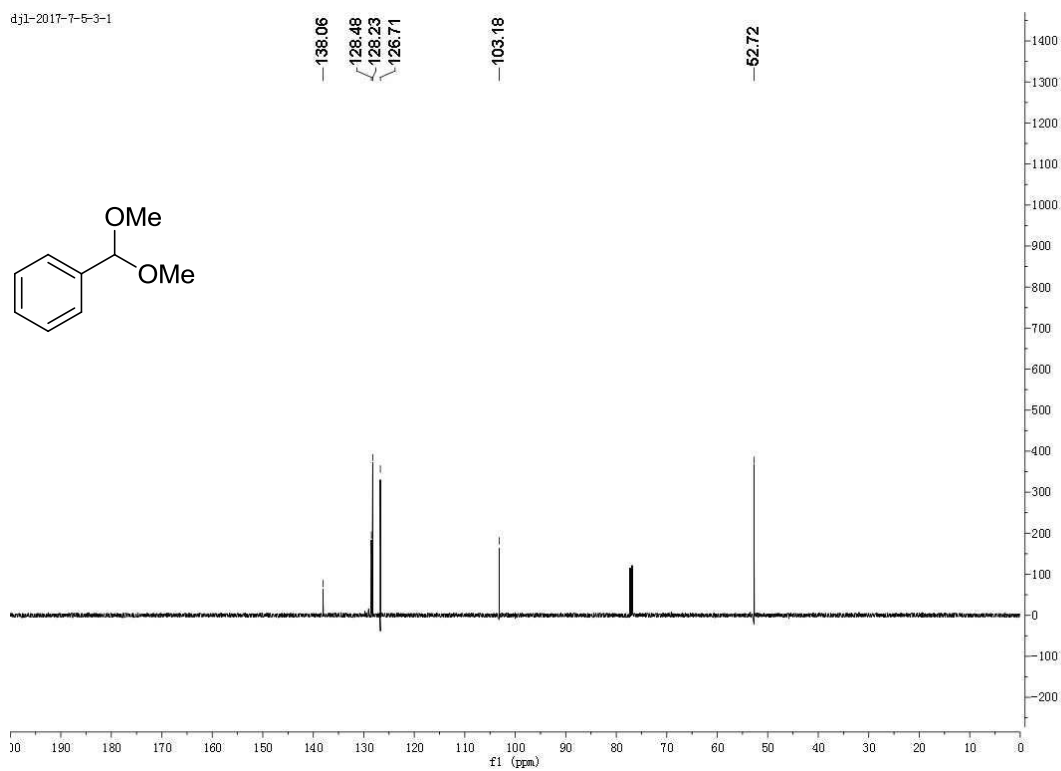

**Figure S14:**  $^{13}\text{C}$  NMR (151 MHz,  $\text{CDCl}_3$ ) of compound **2g**



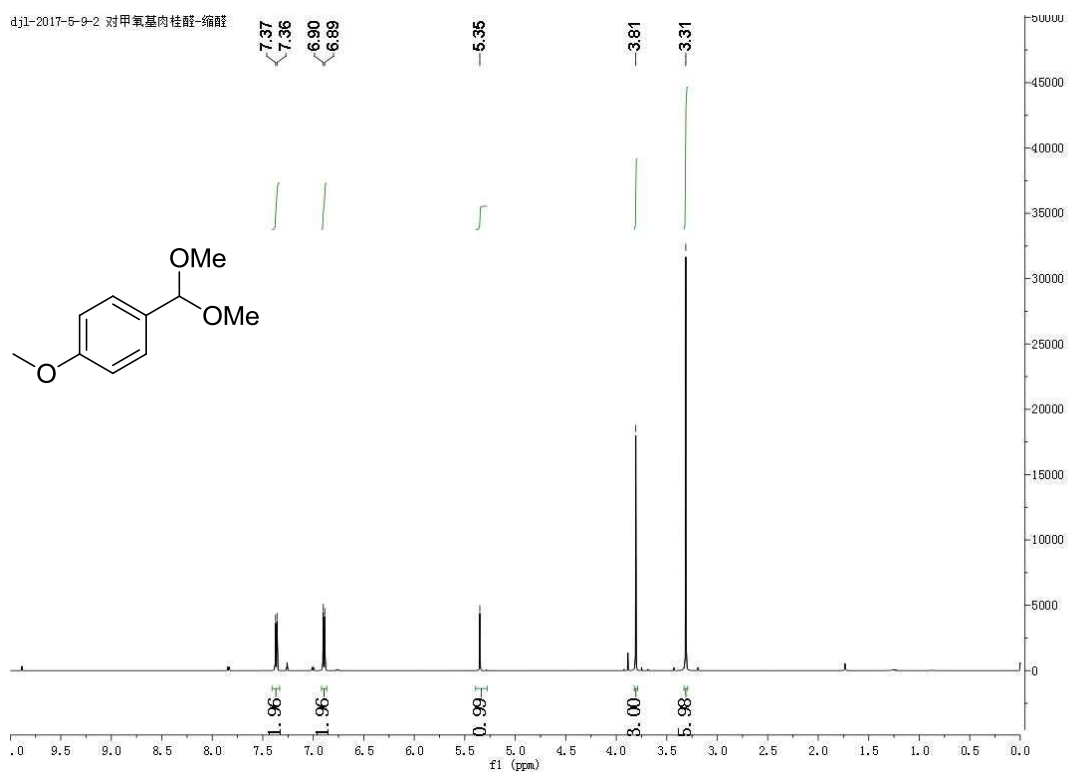

**Figure S15:**  $^1\text{H}$  NMR (600 MHz,  $\text{CDCl}_3$ ) of compound **2h**

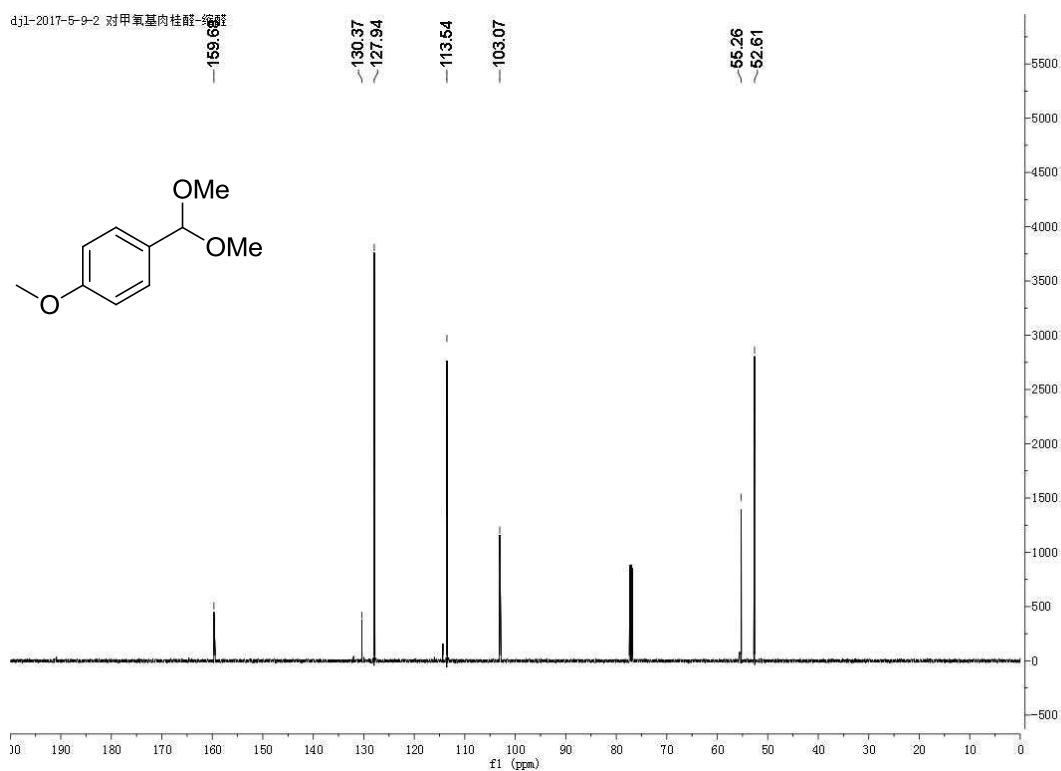

**Figure S16:**  $^{13}\text{C}$  NMR (151 MHz,  $\text{CDCl}_3$ ) of compound **2h**

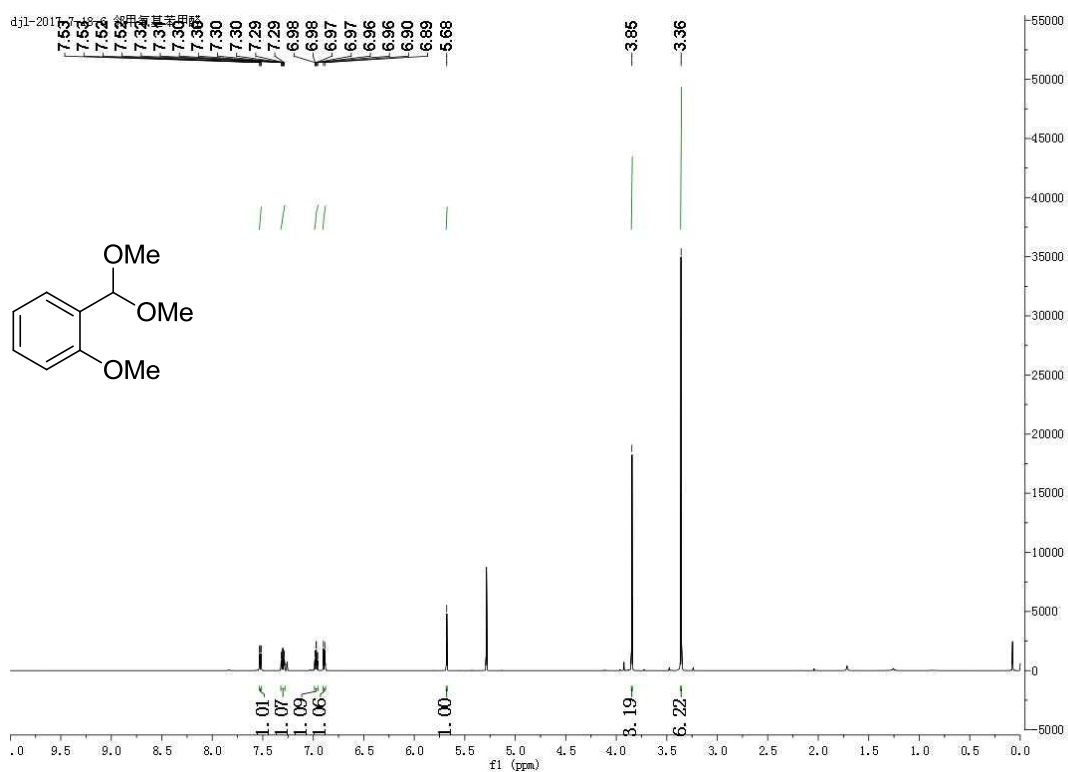

**Figure S17:**  $^1\text{H}$  NMR (600 MHz,  $\text{CDCl}_3$ ) of compound **2i**

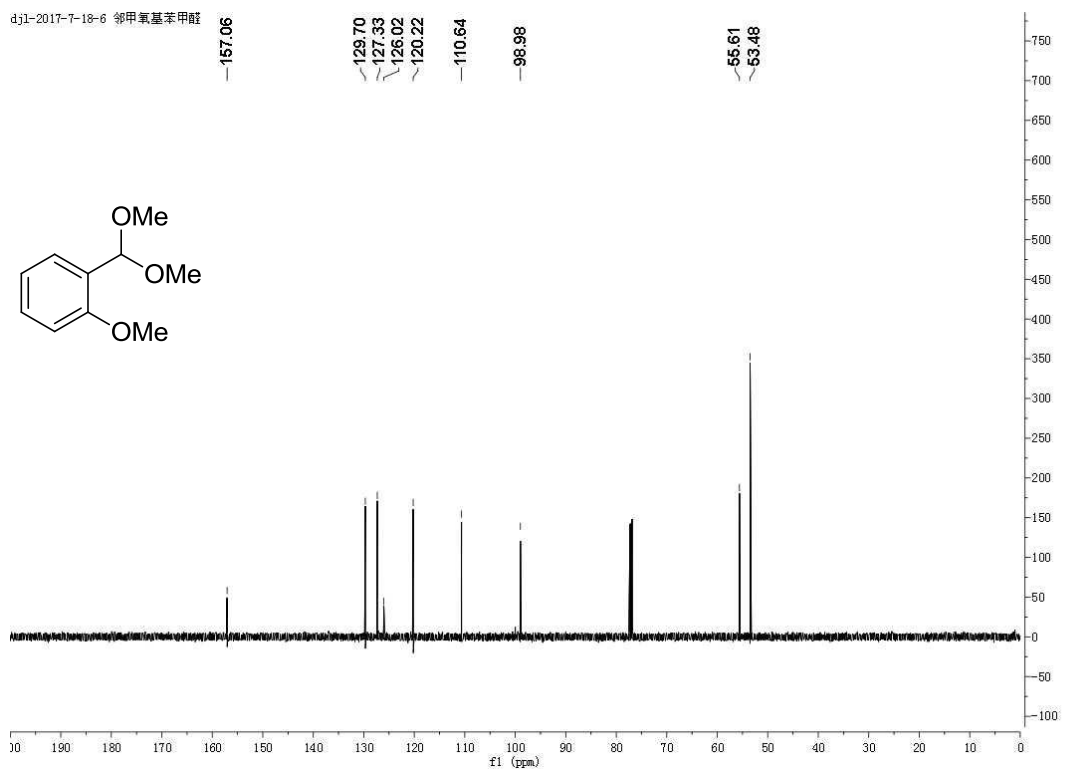

**Figure S18:**  $^{13}\text{C}$  NMR (151 MHz,  $\text{CDCl}_3$ ) of compound **2i**

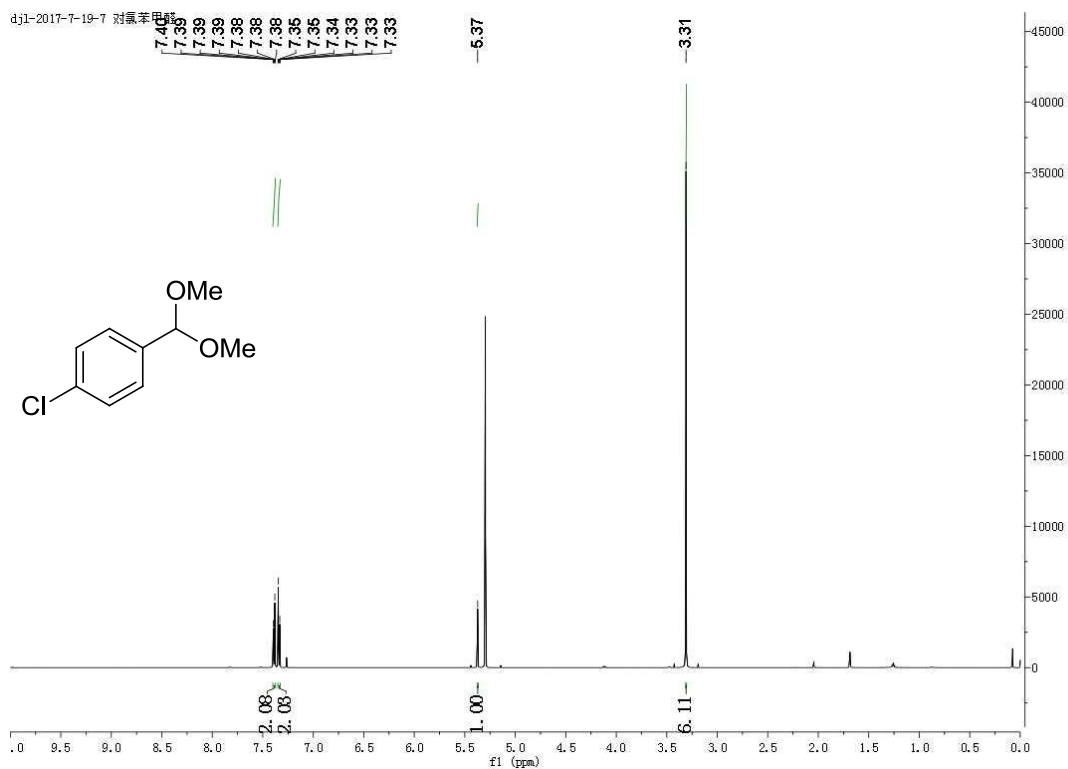

**Figure S19:**  $^1\text{H}$  NMR (600 MHz,  $\text{CDCl}_3$ ) of compound **2j**

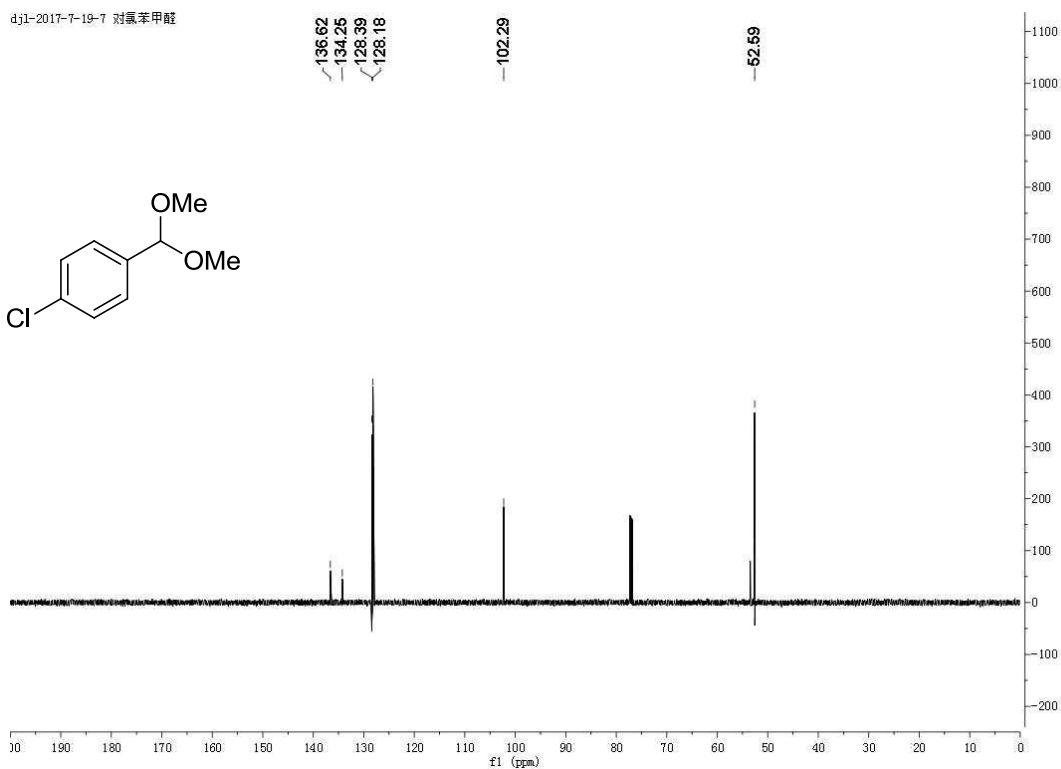

**Figure S20:**  $^{13}\text{C}$  NMR (151 MHz,  $\text{CDCl}_3$ ) of compound **2j**

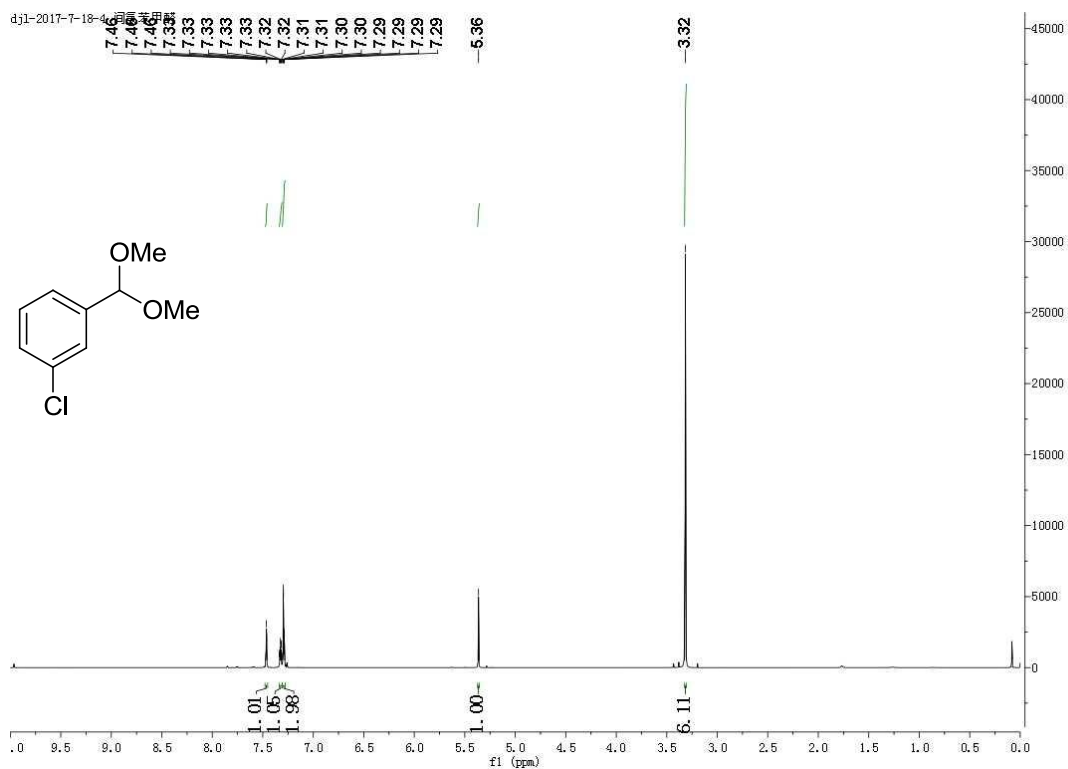

**Figure S21:**  $^1\text{H NMR}$  (600 MHz,  $\text{CDCl}_3$ ) of compound **2k**

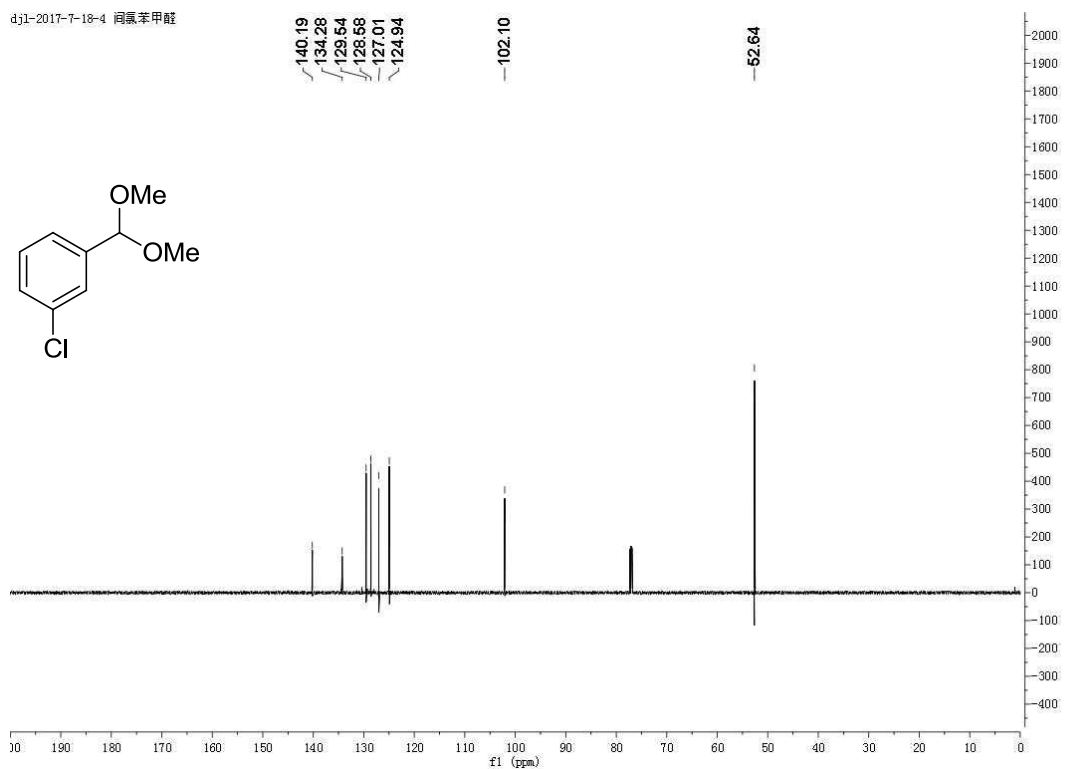

**Figure S22:**  $^{13}\text{C NMR}$  (151 MHz,  $\text{CDCl}_3$ ) of compound **2k**

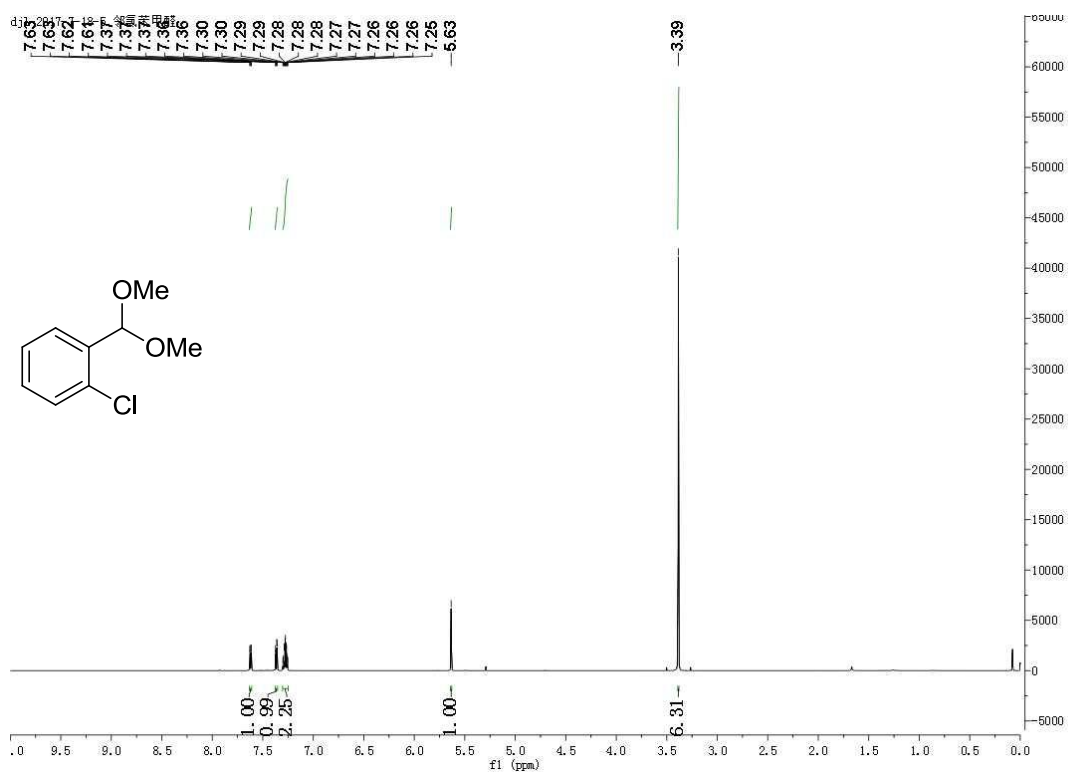

**Figure S23:**  $^1\text{H NMR}$  (600 MHz,  $\text{CDCl}_3$ ) of compound **2I**

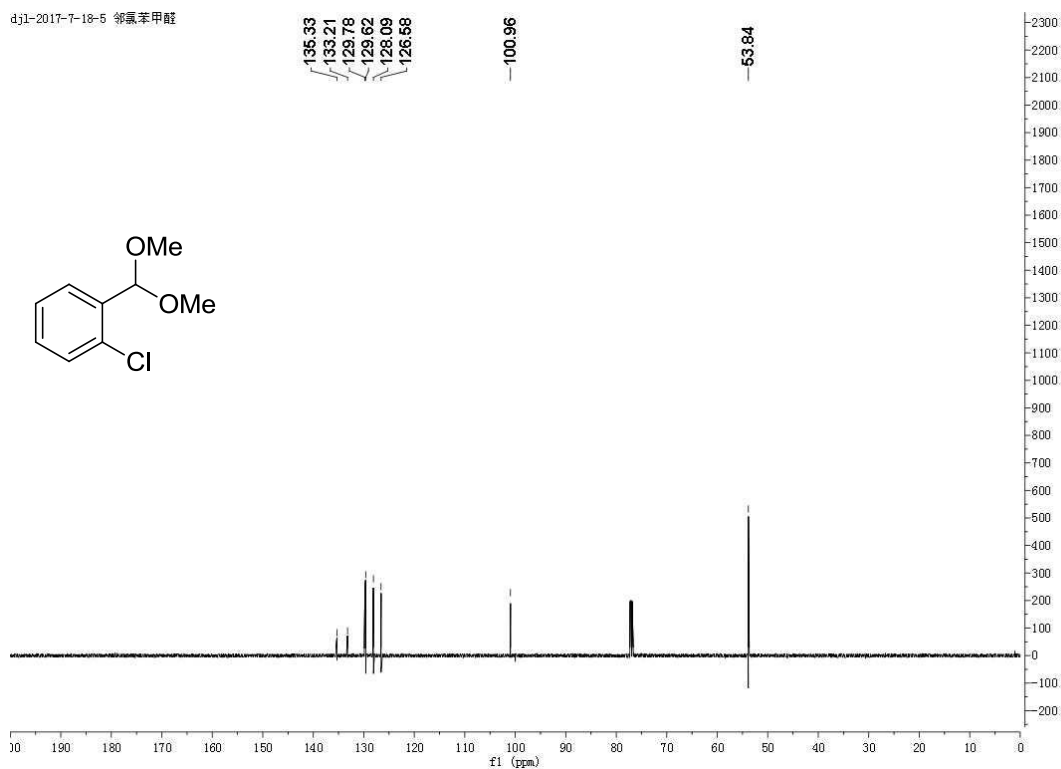

**Figure S24:**  $^{13}\text{C NMR}$  (151 MHz,  $\text{CDCl}_3$ ) of compound **2I**

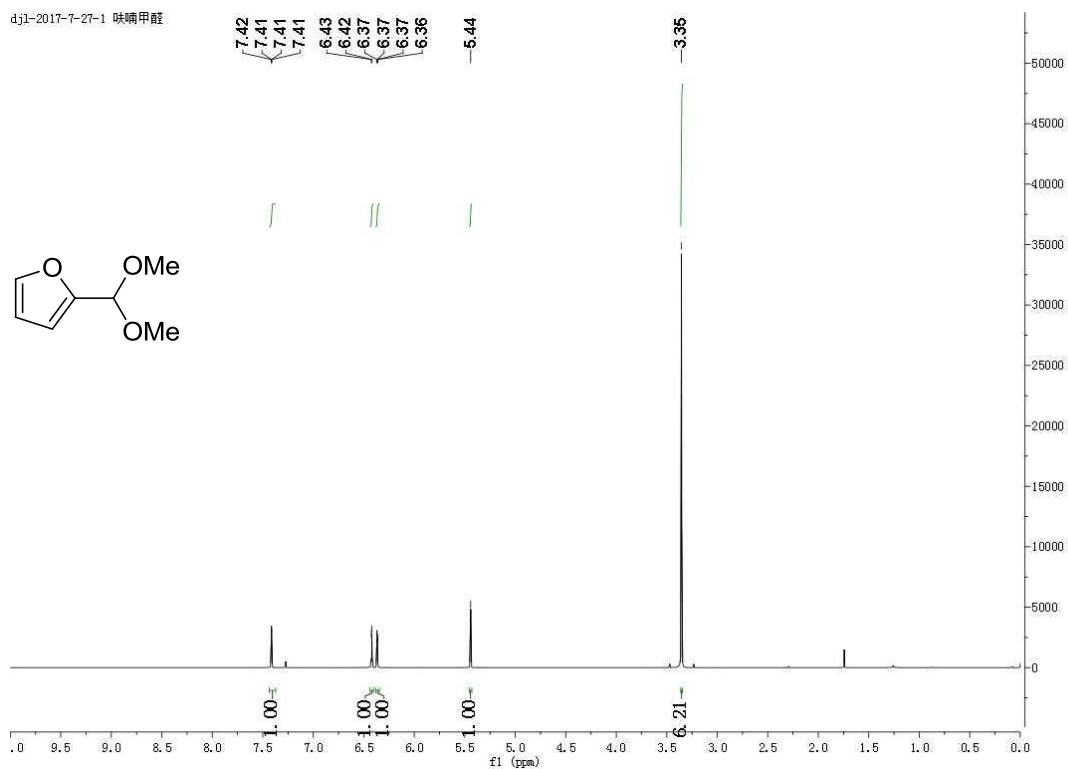

**Figure S25:**  $^1\text{H}$  NMR (600 MHz,  $\text{CDCl}_3$ ) of compound **2m**

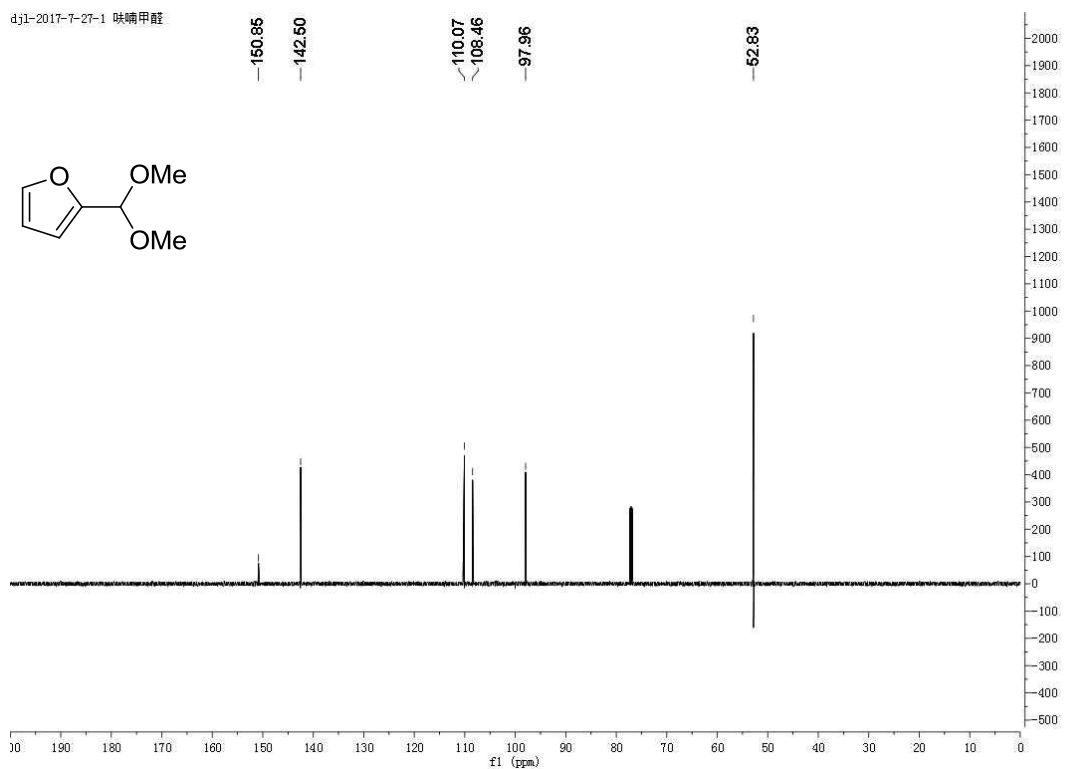

**Figure S26:**  $^{13}\text{C}$  NMR (151 MHz,  $\text{CDCl}_3$ ) of compound **2m**

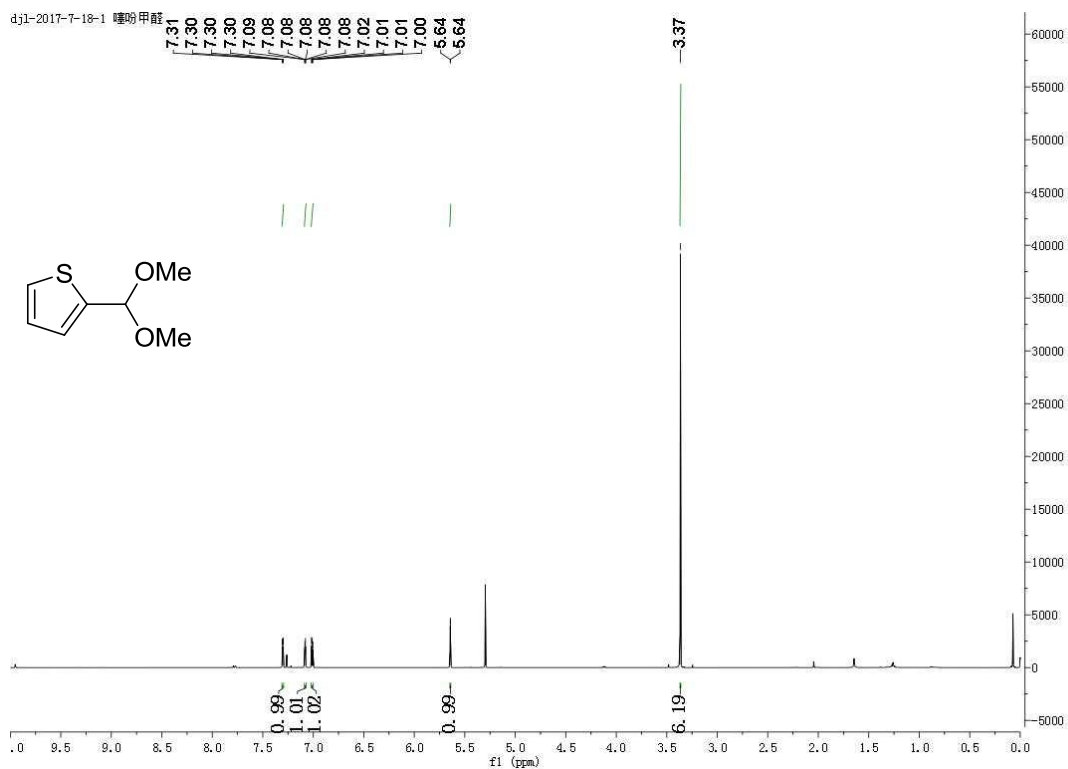

**Figure S27:**  $^1\text{H}$  NMR (600 MHz,  $\text{CDCl}_3$ ) of compound **2n**

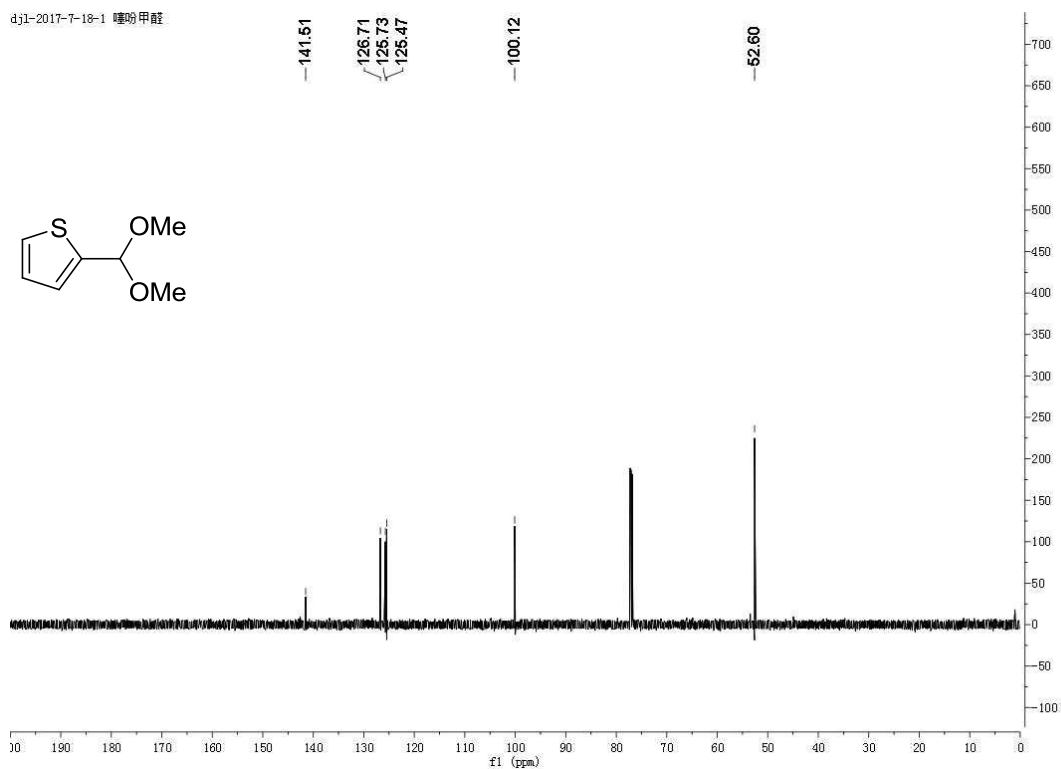

**Figure S28:**  $^{13}\text{C}$  NMR (151 MHz,  $\text{CDCl}_3$ ) of compound **2n**

djl-2017-7-5-6

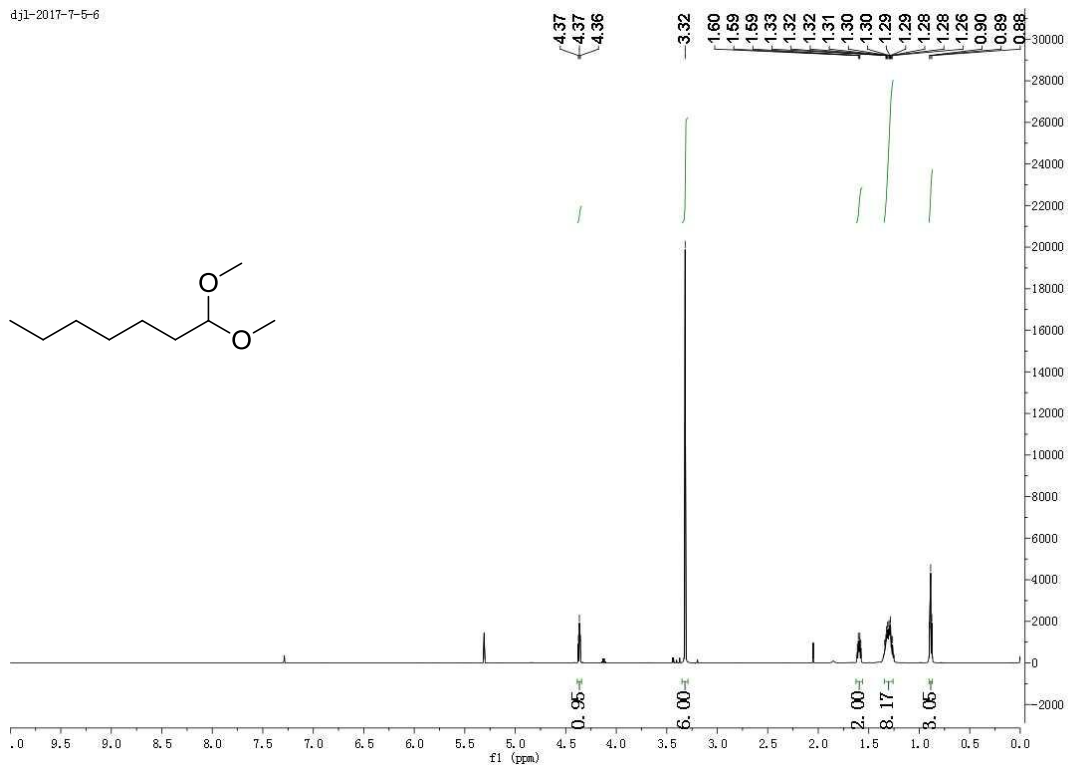

**Figure S29:**  $^1\text{H}$  NMR (600 MHz,  $\text{CDCl}_3$ ) of compound **2o**

djl-2017-7-5-6

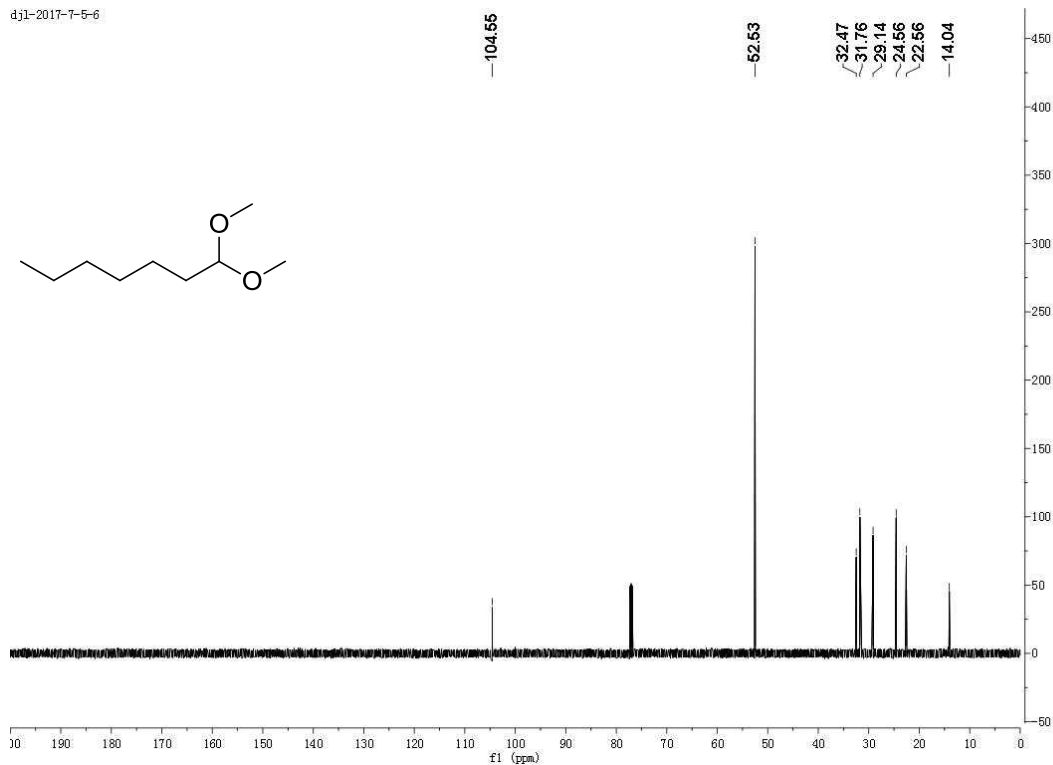

**Figure S30:**  $^{13}\text{C}$  NMR (151 MHz,  $\text{CDCl}_3$ ) of compound **2o**



djl-2017-5-26-2 正壬醛-缩醛

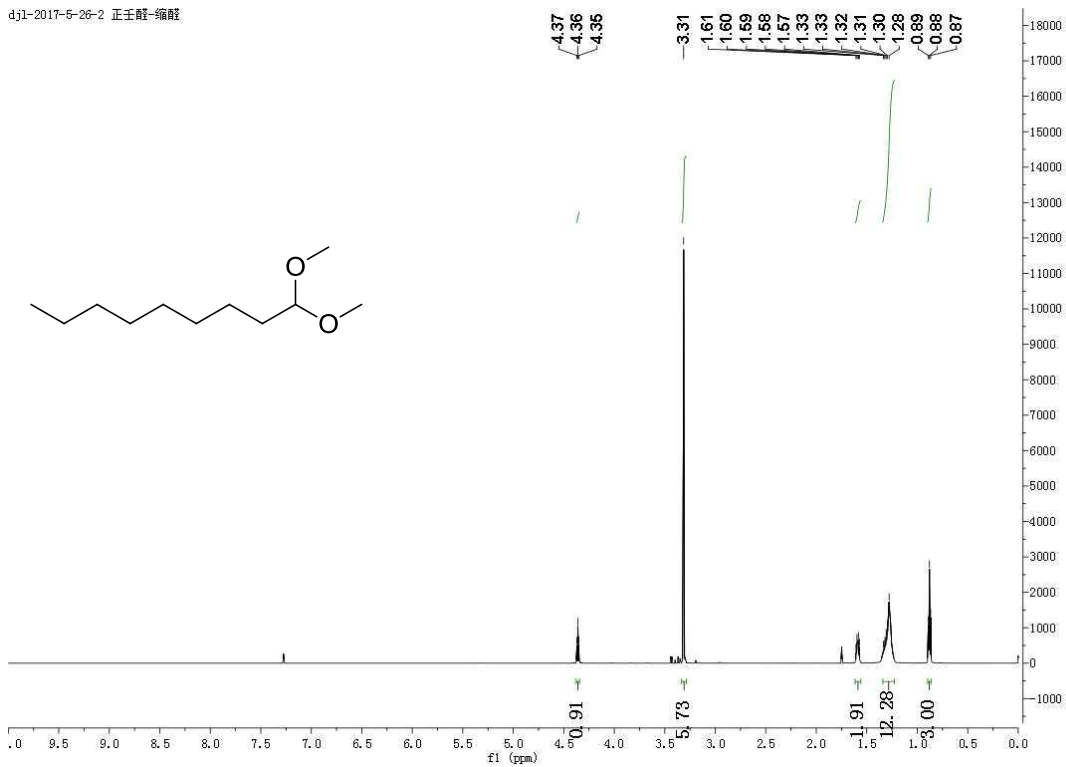

Figure S31:  $^1\text{H}$  NMR (600 MHz,  $\text{CDCl}_3$ ) of compound 2p

djl-2017-5-26-2 正壬醛-缩醛

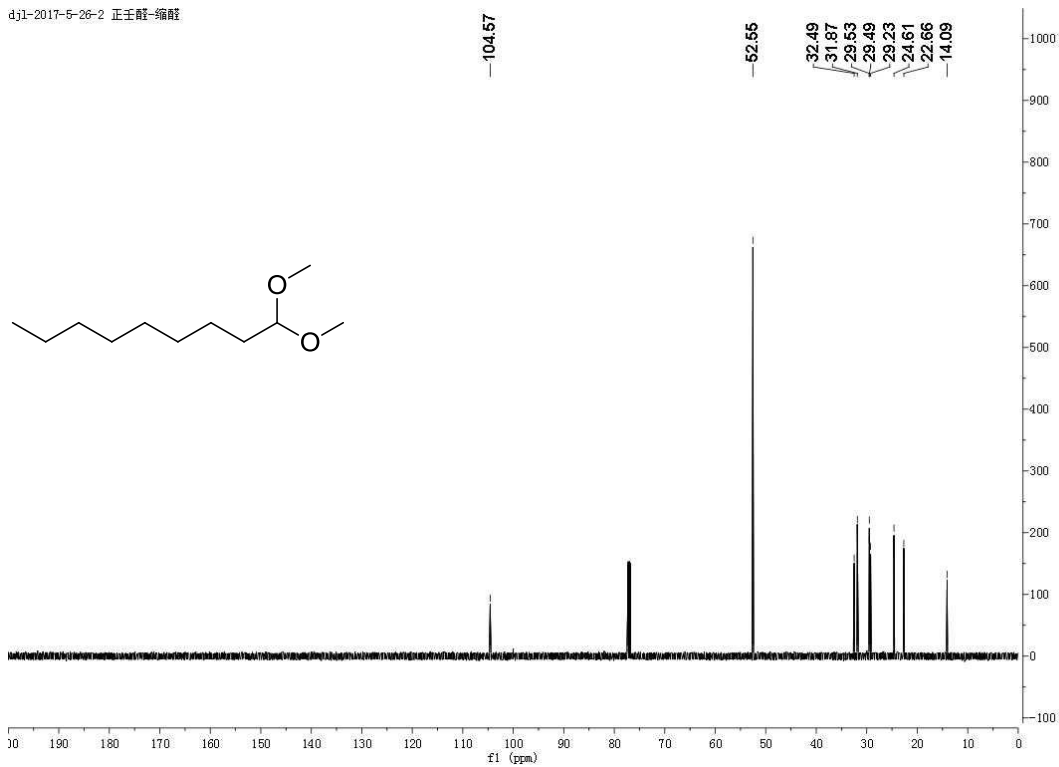

Figure S32:  $^{13}\text{C}$  NMR (151 MHz,  $\text{CDCl}_3$ ) of compound 2p

djl-2017-7-19-9 环己烷甲醛

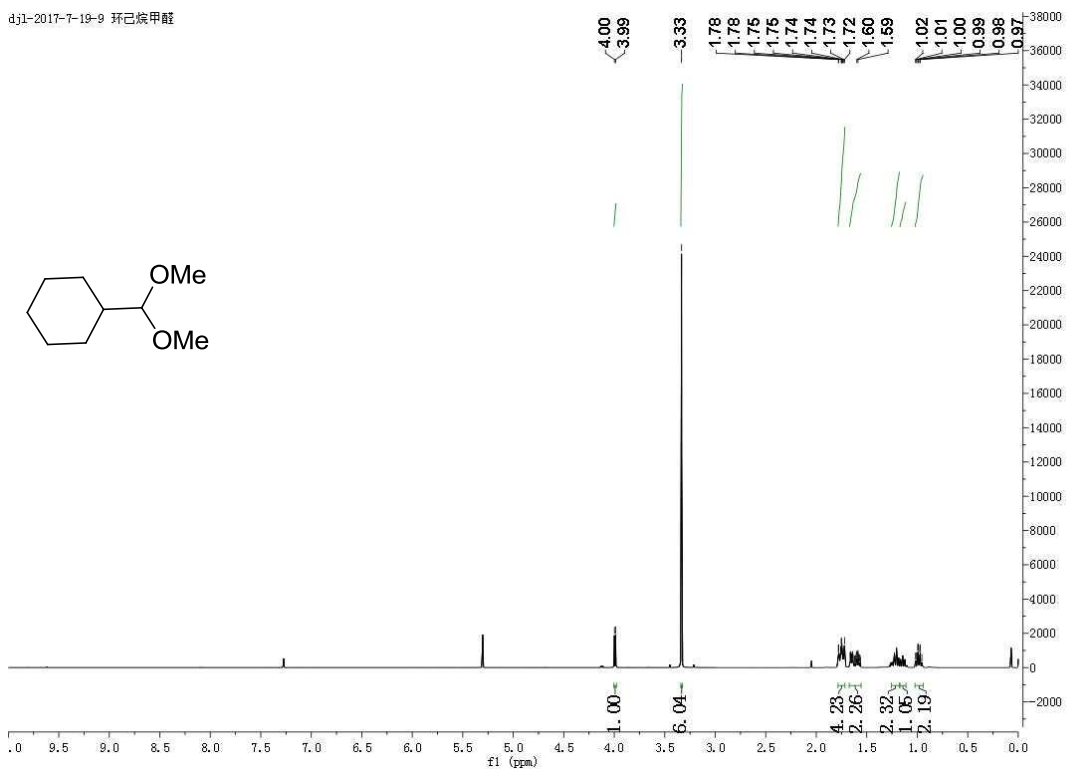

Figure S33: <sup>1</sup>H NMR (600 MHz, CDCl<sub>3</sub>) of compound 2q

djl-2017-7-19-9 环己烷甲醛

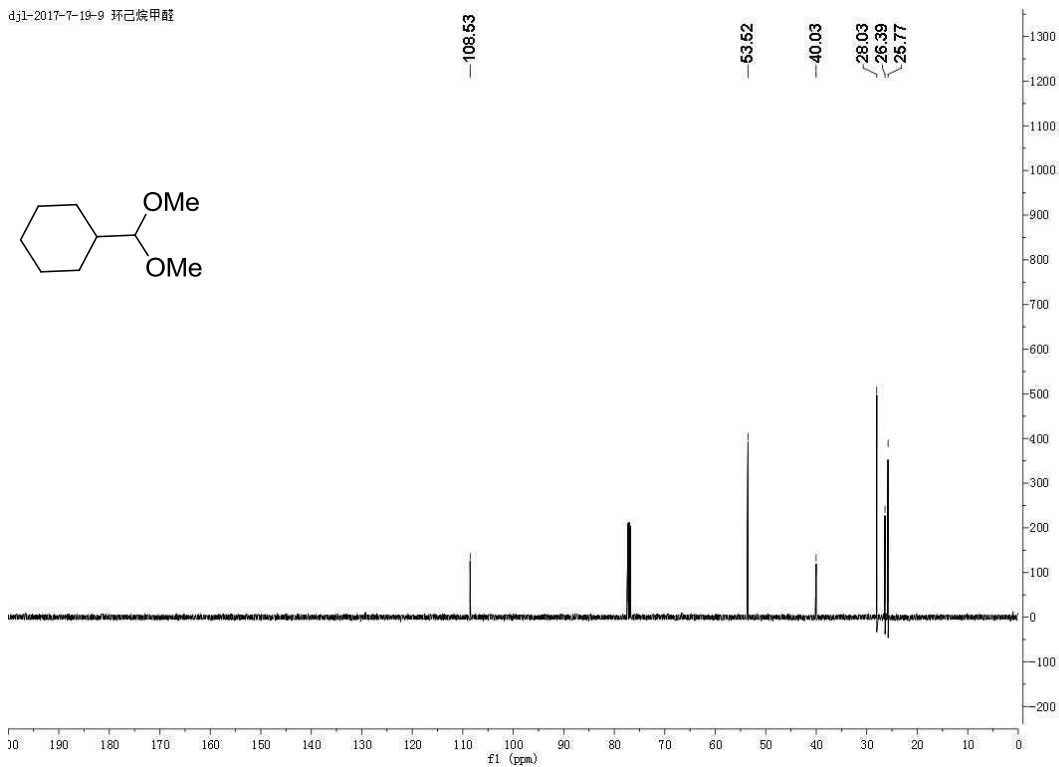

Figure S34: <sup>13</sup>C NMR (151 MHz, CDCl<sub>3</sub>) of compound 2q

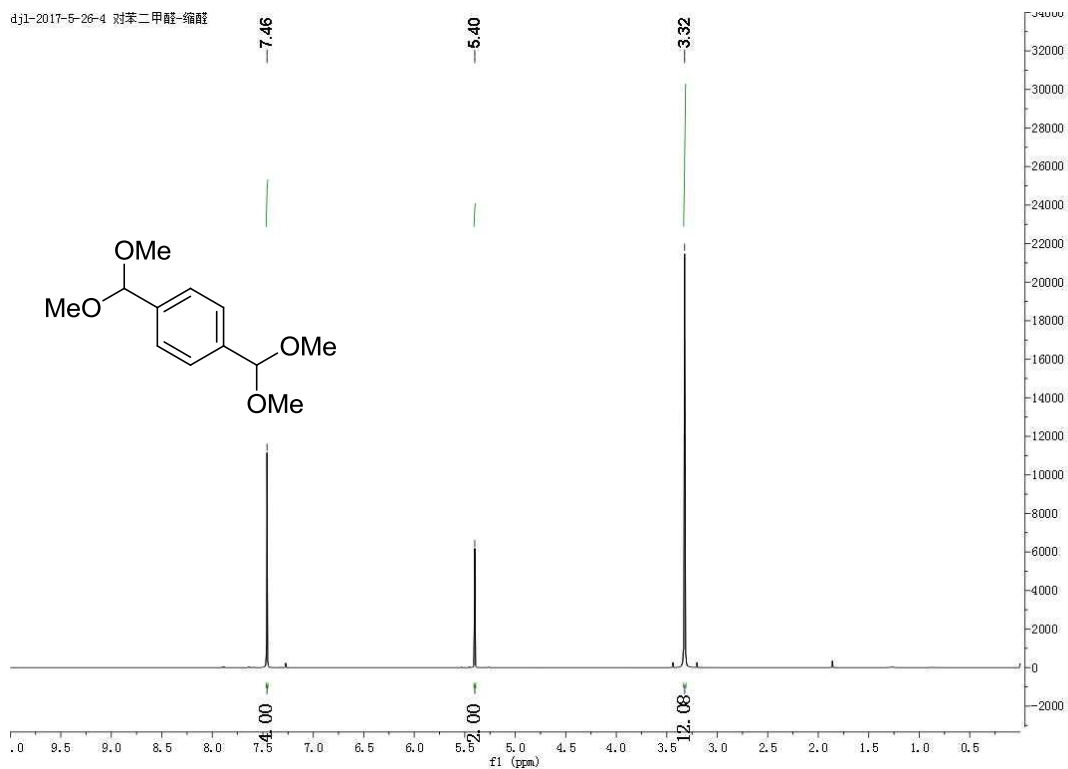

**Figure S35:**  $^1\text{H}$  NMR (600 MHz,  $\text{CDCl}_3$ ) of compound **2r**

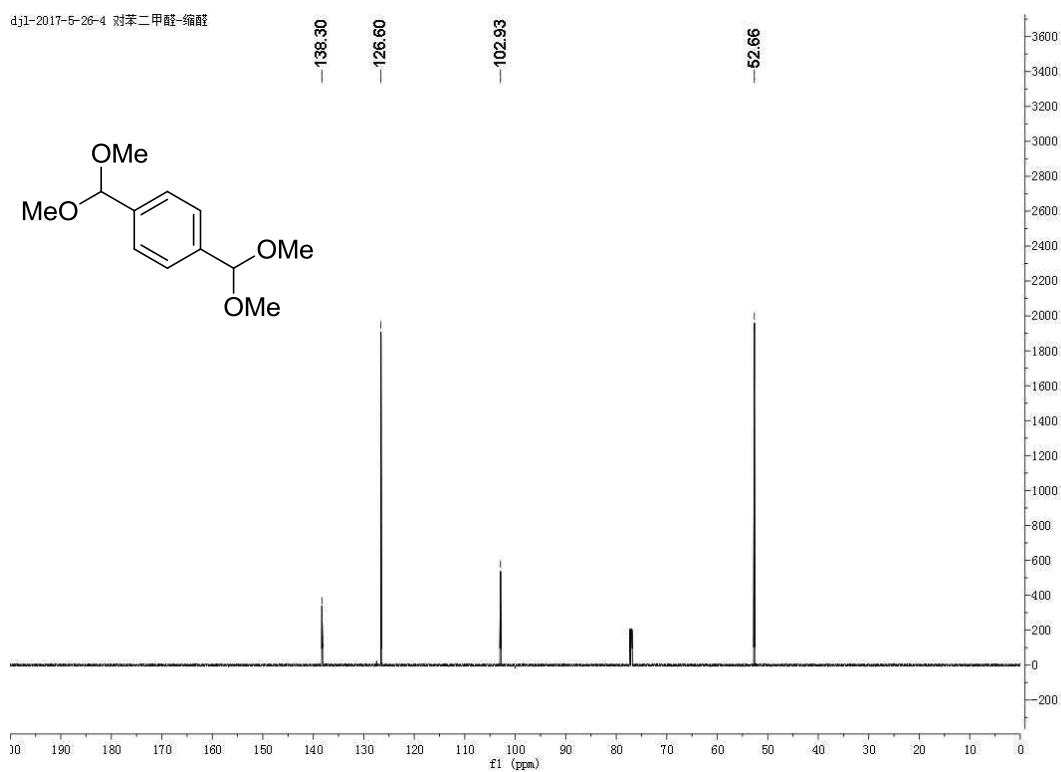

**Figure S36:**  $^{13}\text{C}$  NMR (151 MHz,  $\text{CDCl}_3$ ) of compound **2r**

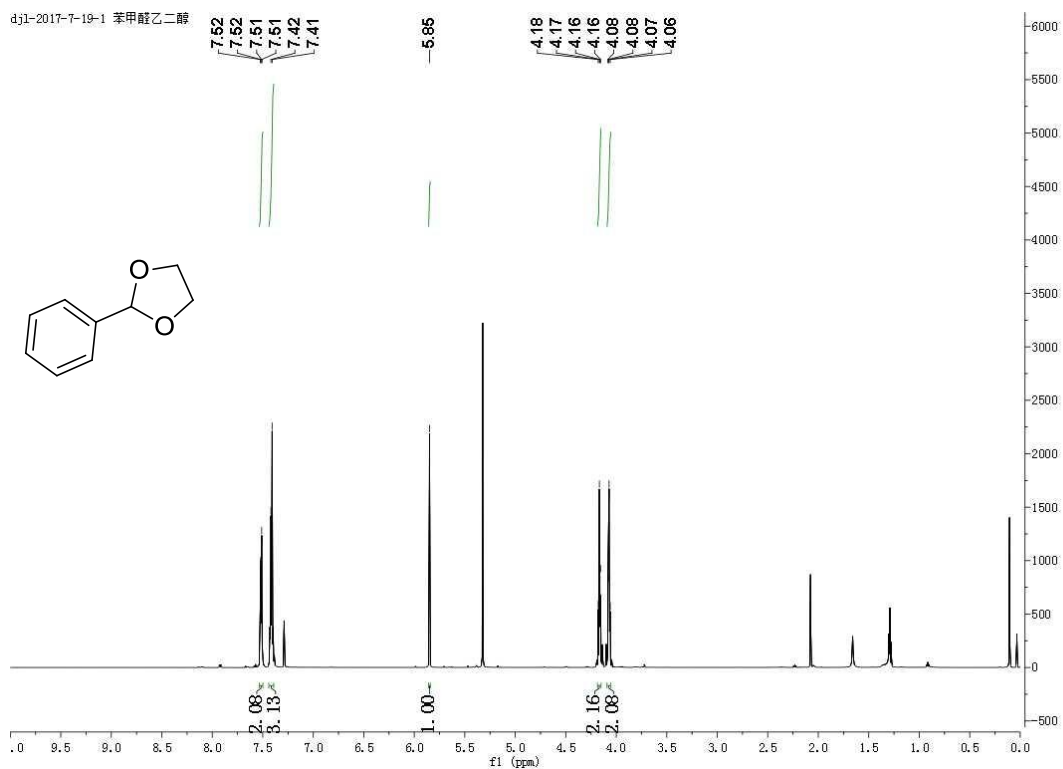

**Figure S37:**  $^1\text{H}$  NMR (600 MHz,  $\text{CDCl}_3$ ) of compound **2s**

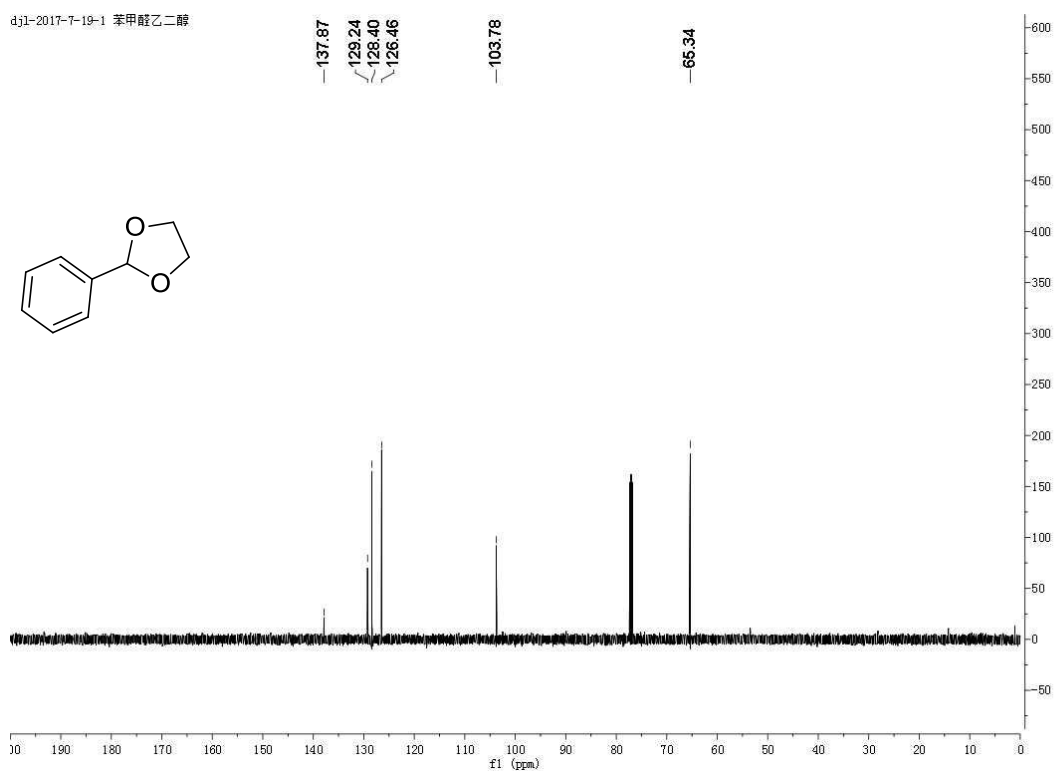

**Figure S38:**  $^{13}\text{C}$  NMR (151 MHz,  $\text{CDCl}_3$ ) of compound **2s**

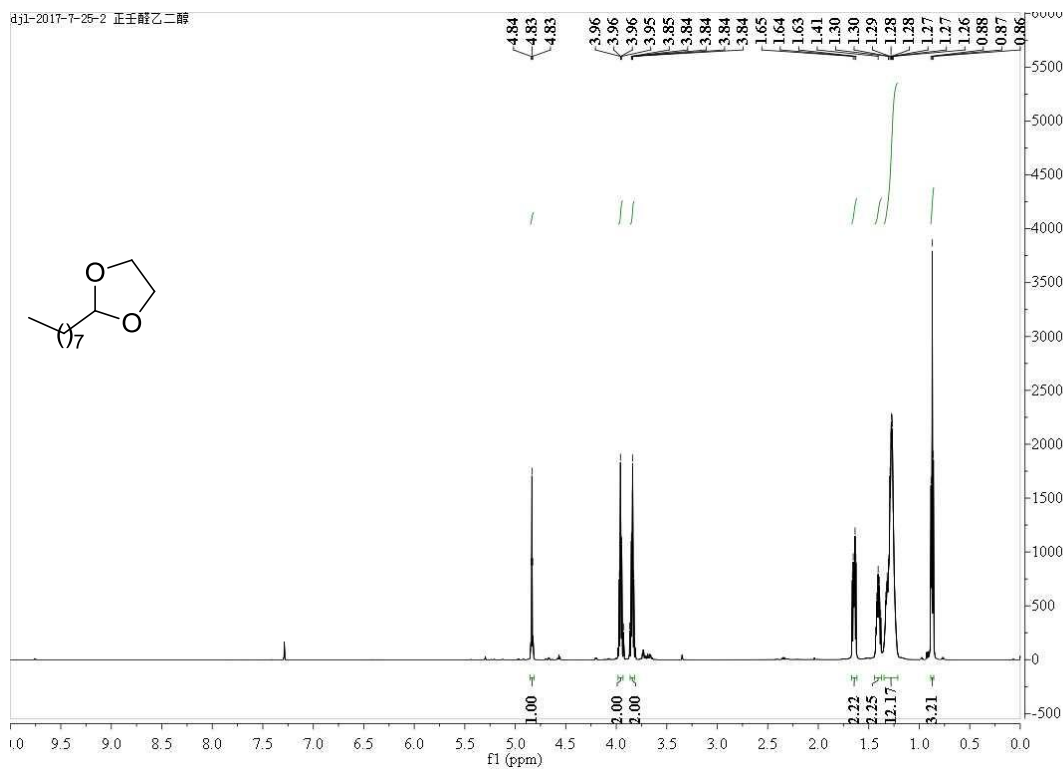

Figure S39:  $^1\text{H}$  NMR (600 MHz,  $\text{CDCl}_3$ ) of compound 2t

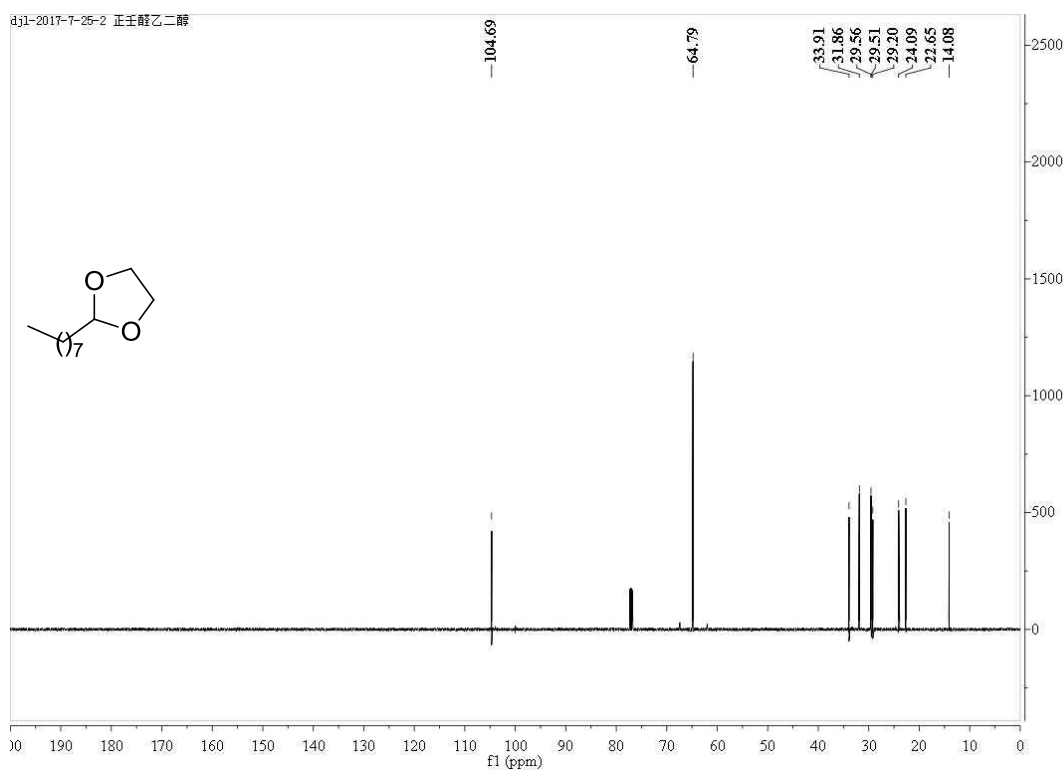

Figure S40:  $^{13}\text{C}$  NMR (151 MHz,  $\text{CDCl}_3$ ) of compound 2t

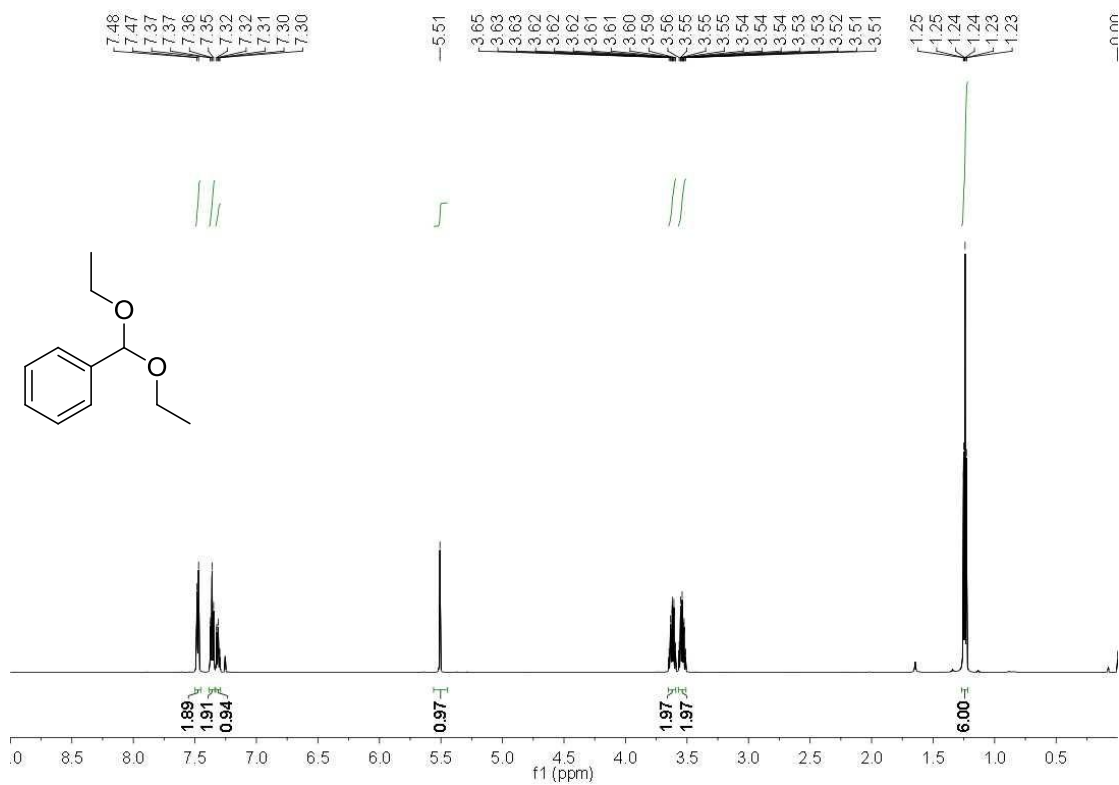

**Figure S41:**  $^1\text{H NMR}$  (600 MHz,  $\text{CDCl}_3$ ) of compound **2u**

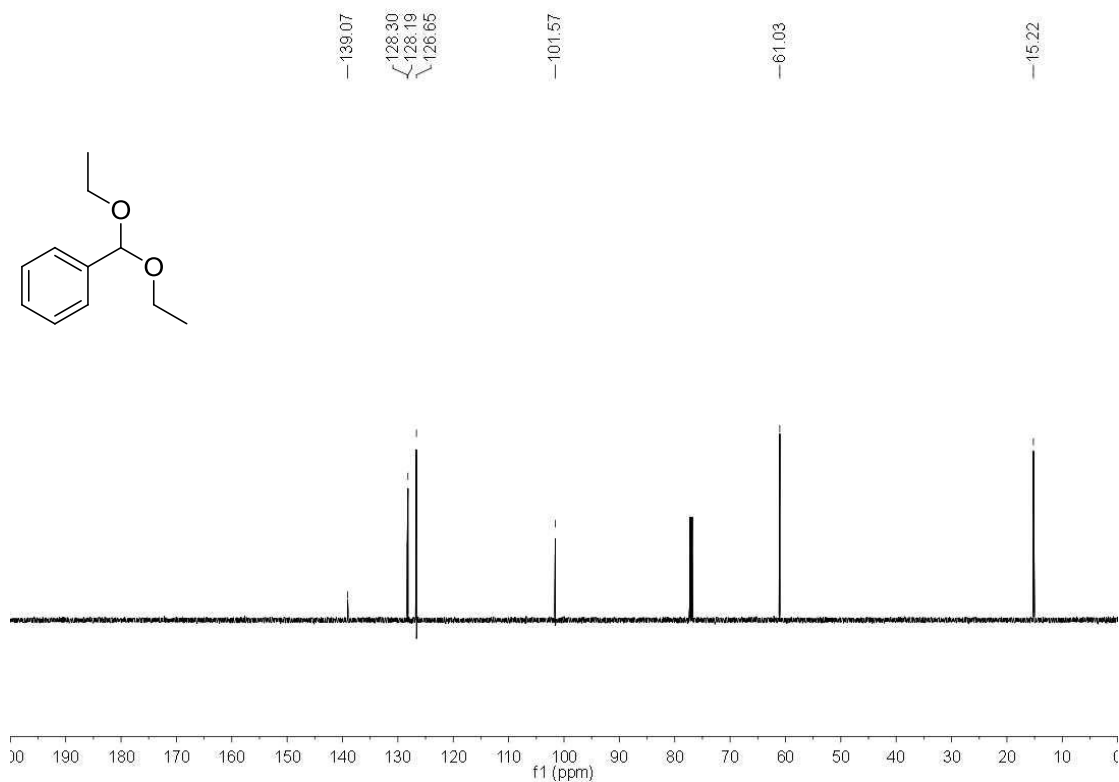

**Figure S42:**  $^{13}\text{C NMR}$  (151 MHz,  $\text{CDCl}_3$ ) of compound **2u**

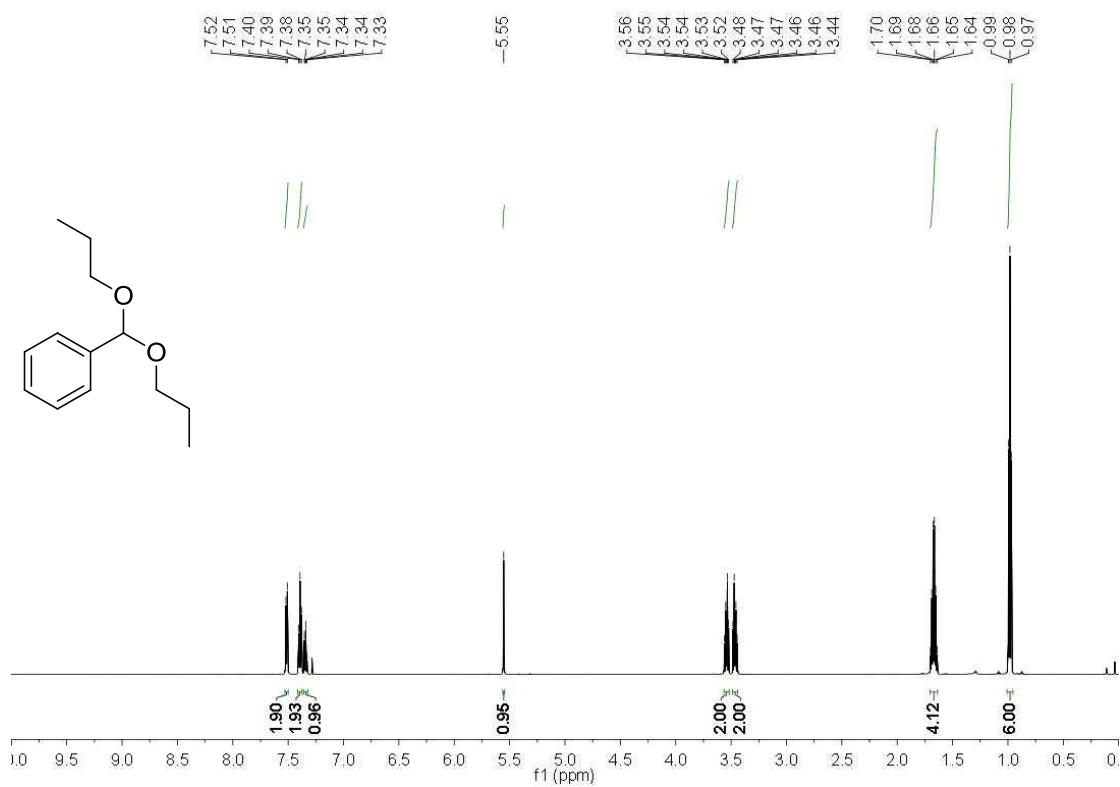

**Figure S43:**  $^1\text{H NMR}$  (600 MHz,  $\text{CDCl}_3$ ) of compound **2v**

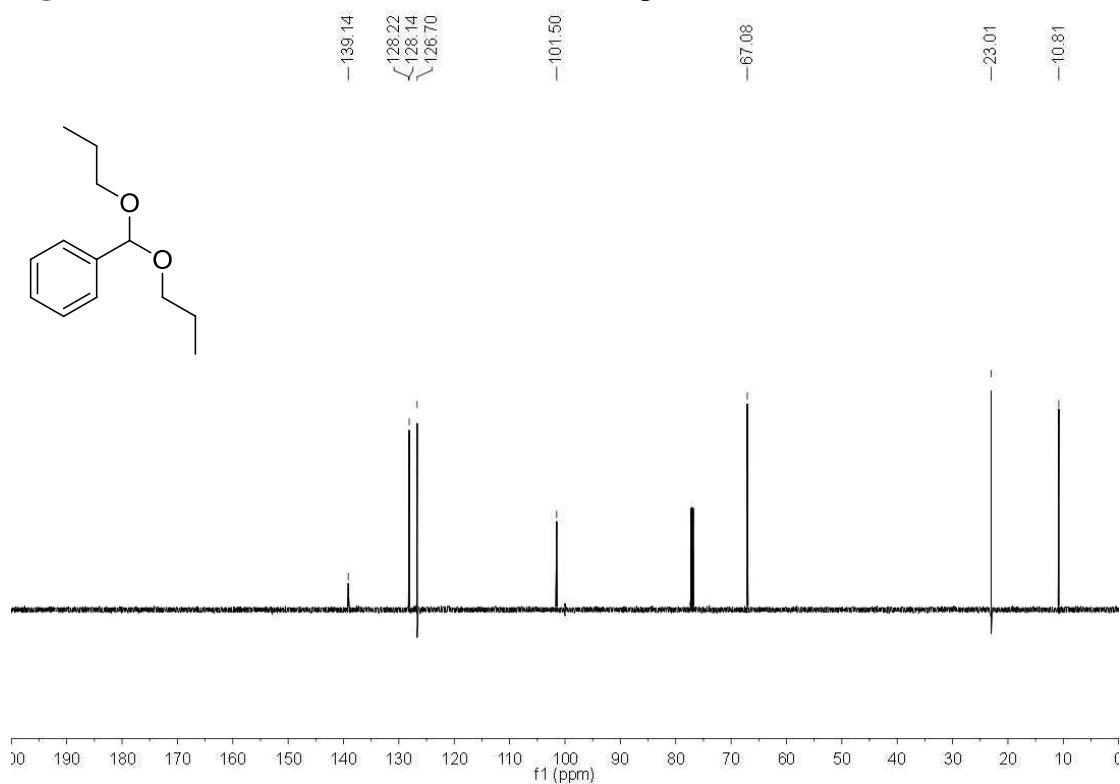

**Figure S44:**  $^{13}\text{C NMR}$  (151 MHz,  $\text{CDCl}_3$ ) of compound **2v**

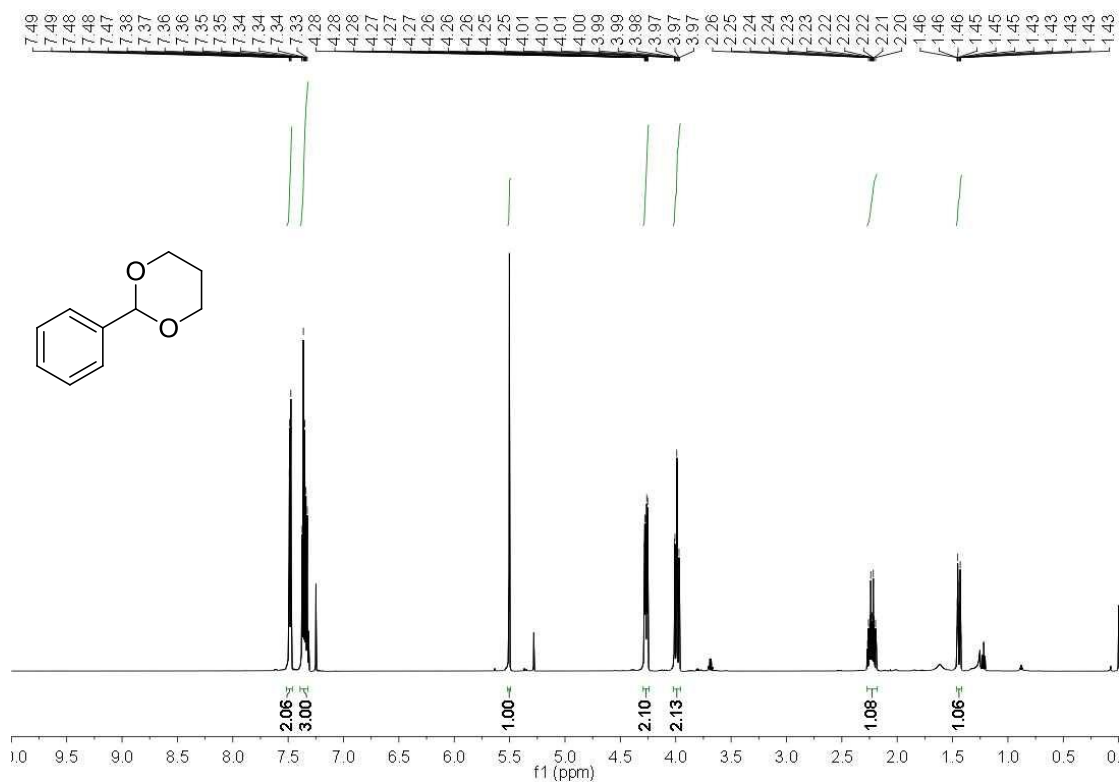

**Figure S45:**  $^1\text{H NMR}$  (600 MHz,  $\text{CDCl}_3$ ) of compound **2w**

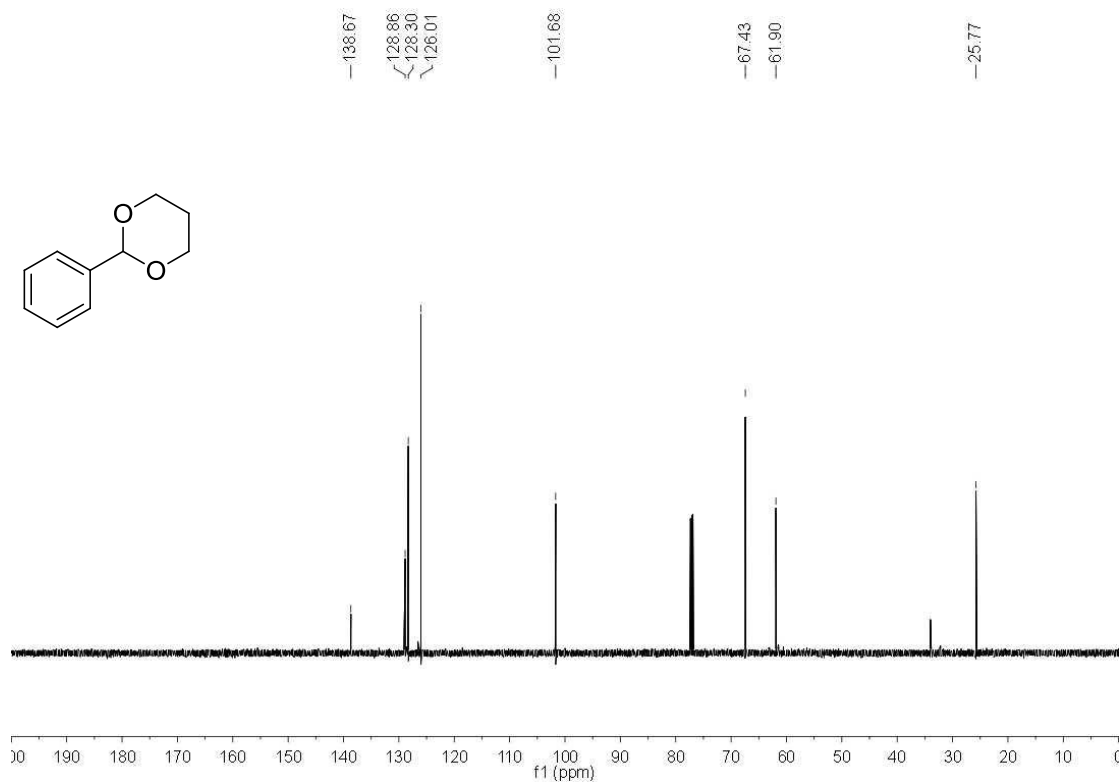

**Figure S46:**  $^{13}\text{C NMR}$  (151 MHz,  $\text{CDCl}_3$ ) of compound **2w**



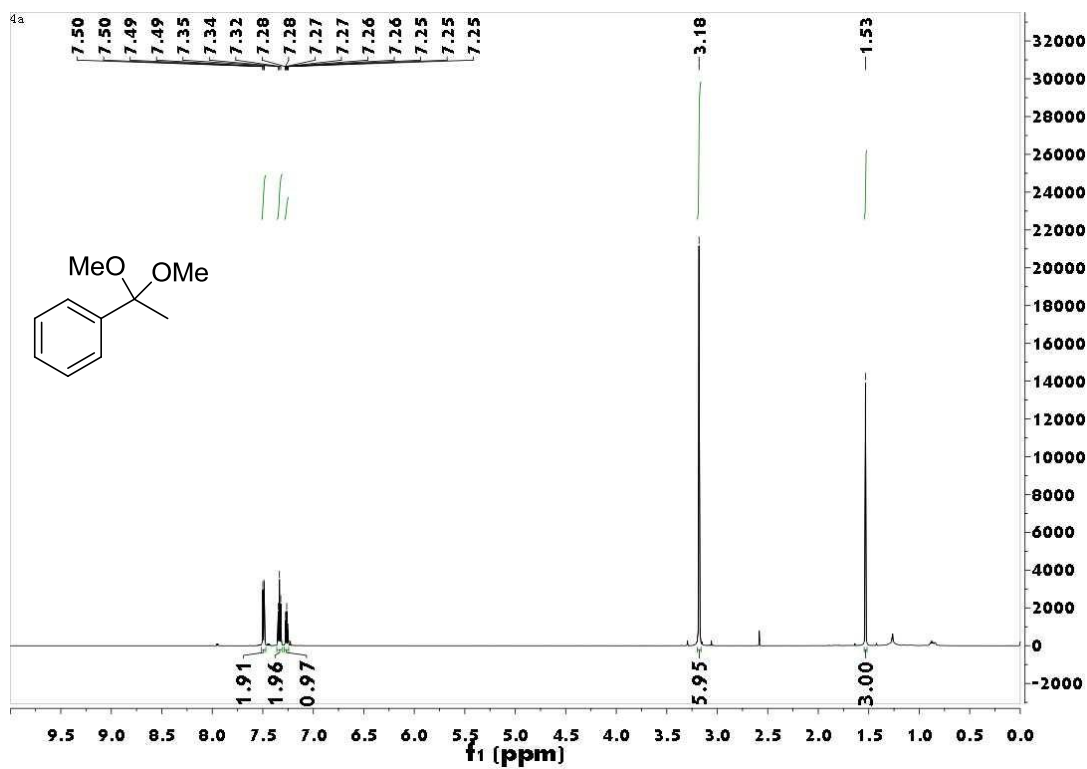

Figure S47:  $^1\text{H}$  NMR (600 MHz,  $\text{CDCl}_3$ ) of compound 4a

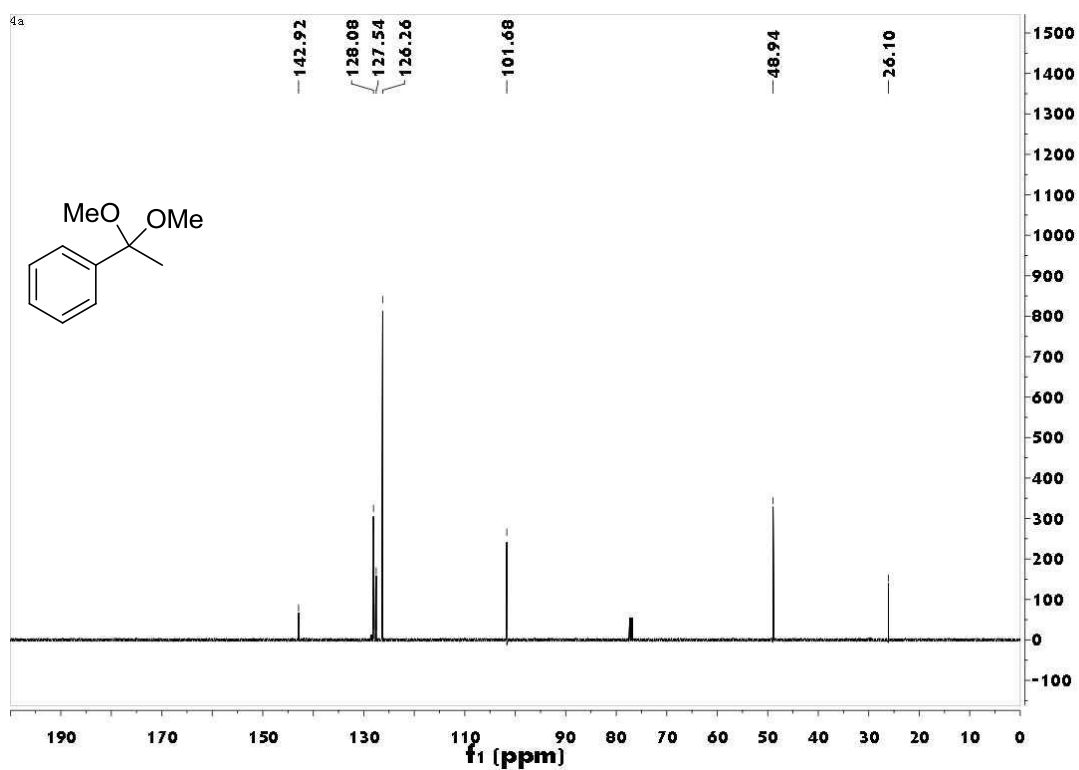

Figure S48:  $^{13}\text{C}$  NMR (151 MHz,  $\text{CDCl}_3$ ) of compound 4a

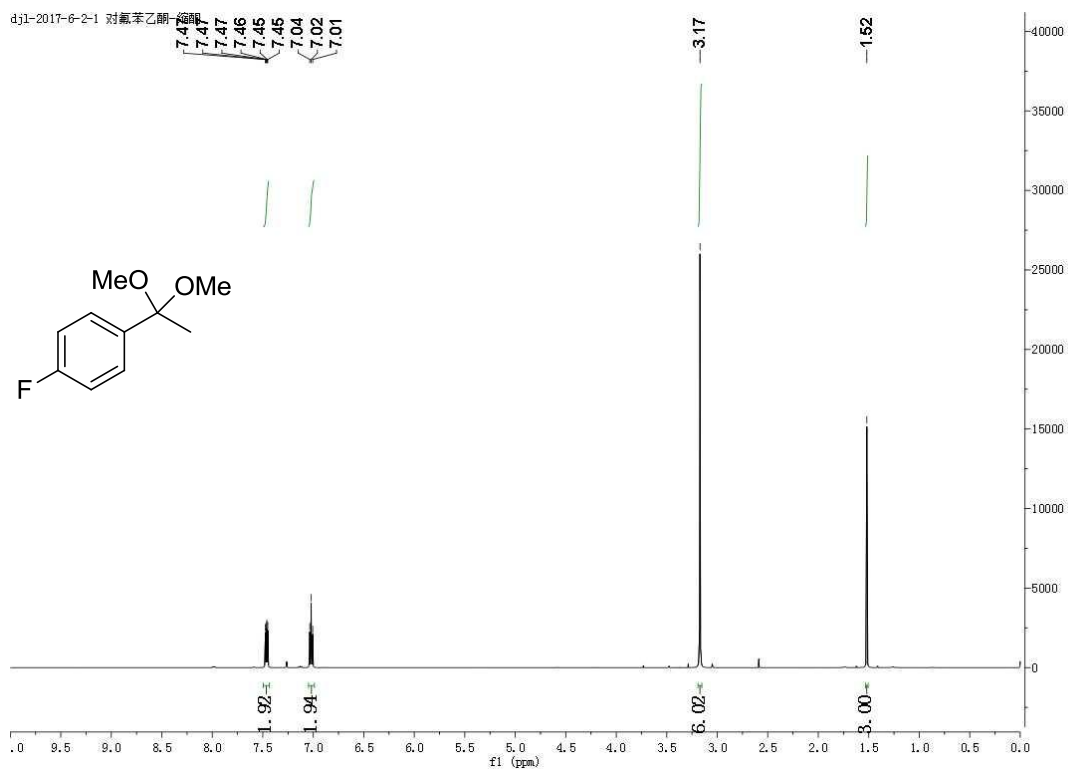

**Figure S49:**  $^1\text{H}$  NMR (600 MHz,  $\text{CDCl}_3$ ) of compound **4b**

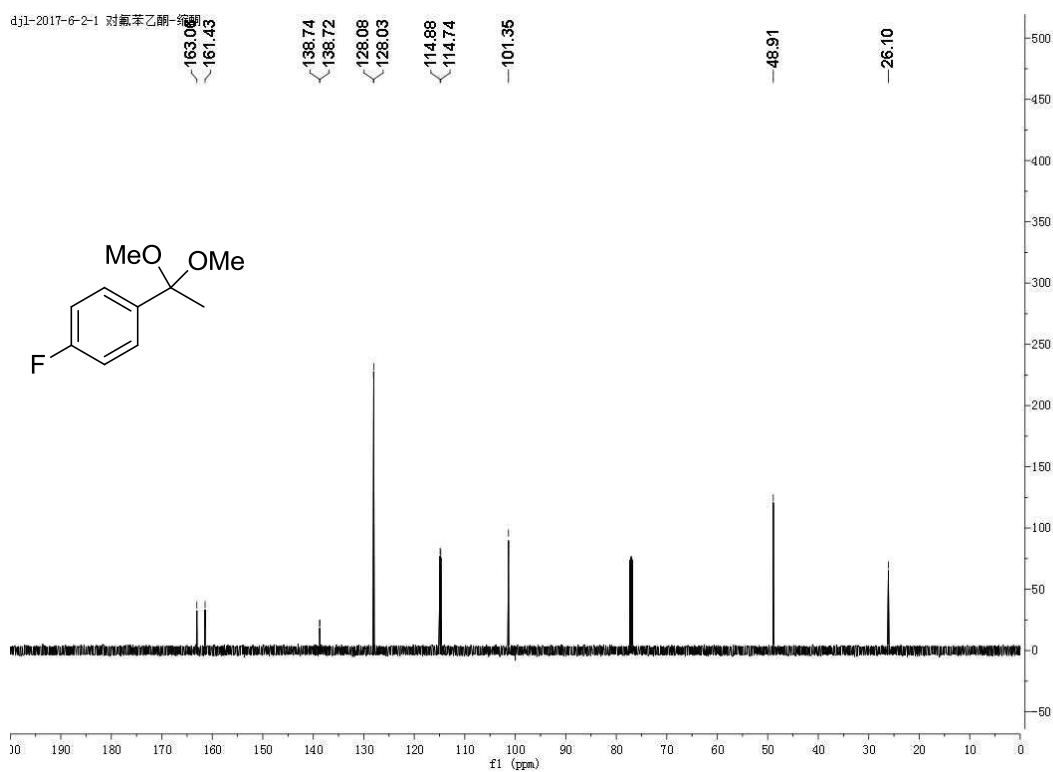

**Figure S50:**  $^{13}\text{C}$  NMR (151 MHz,  $\text{CDCl}_3$ ) of compound **4b**

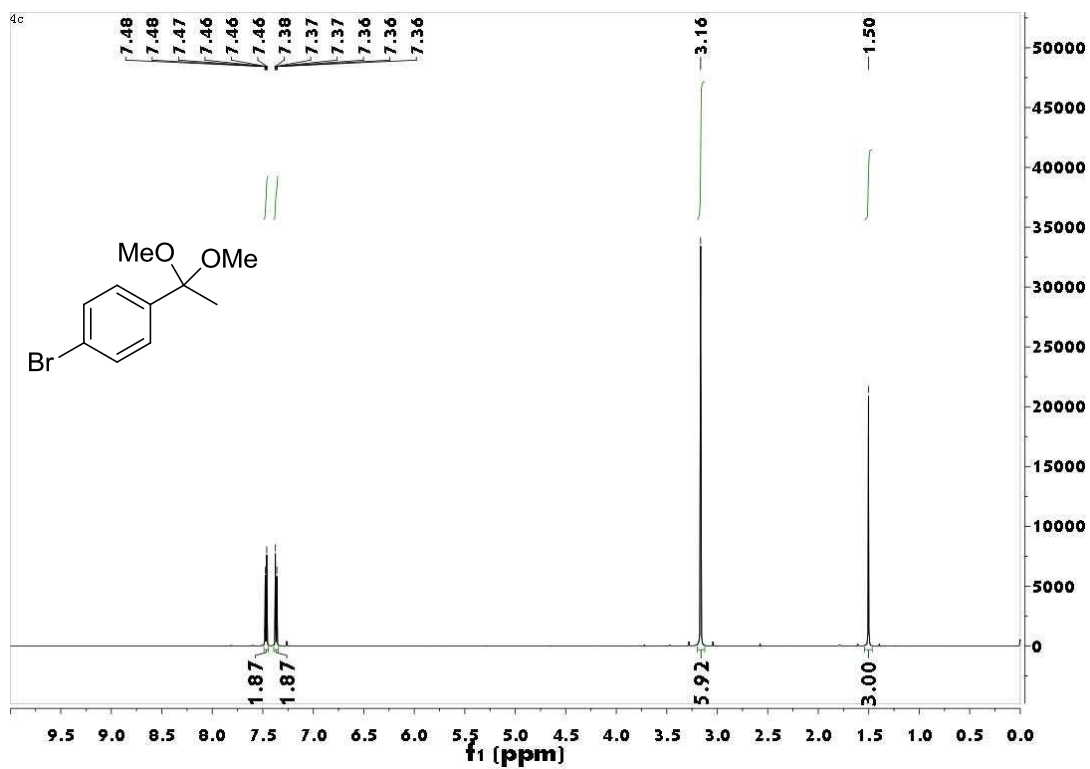

Figure S51:  $^1\text{H}$  NMR (600 MHz,  $\text{CDCl}_3$ ) of compound 4c

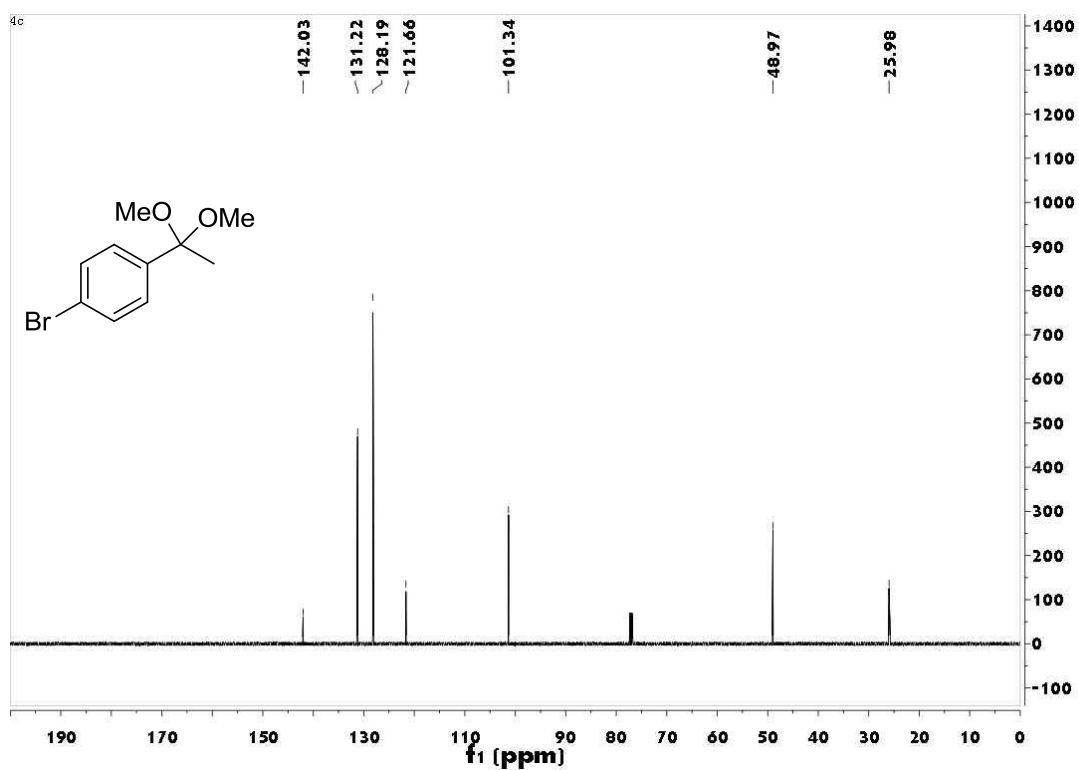

Figure S52:  $^{13}\text{C}$  NMR (151 MHz,  $\text{CDCl}_3$ ) of compound 4c

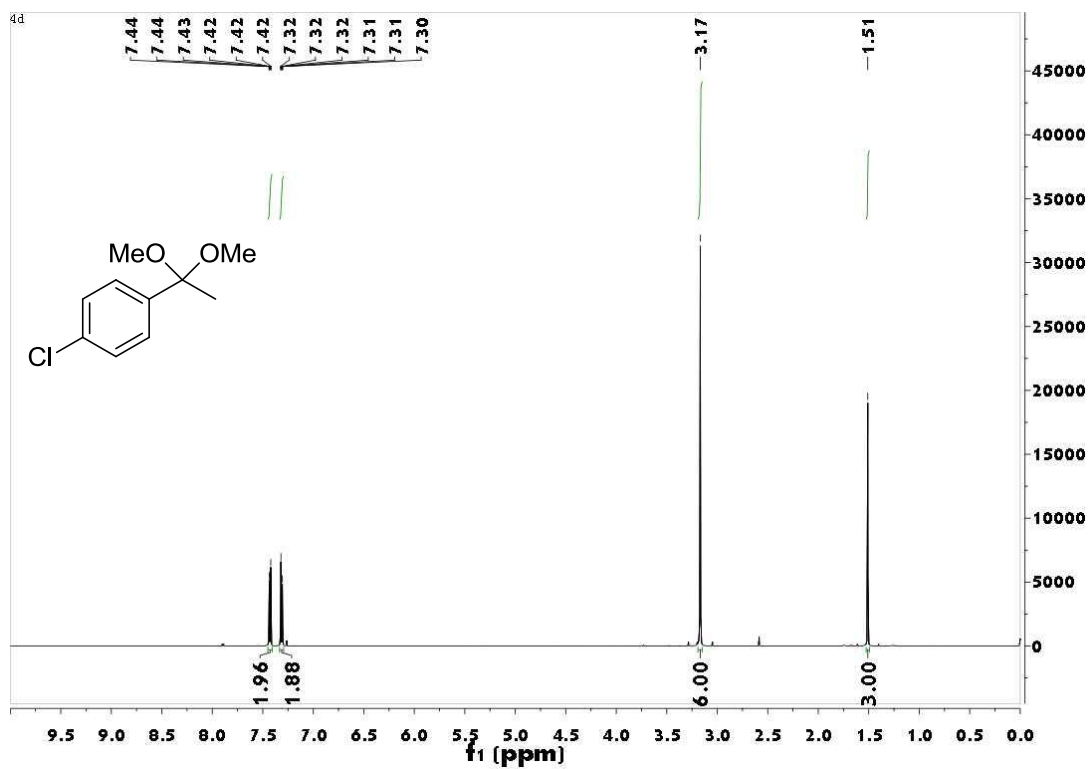

Figure S53:  $^1\text{H}$  NMR (600 MHz,  $\text{CDCl}_3$ ) of compound **4d**

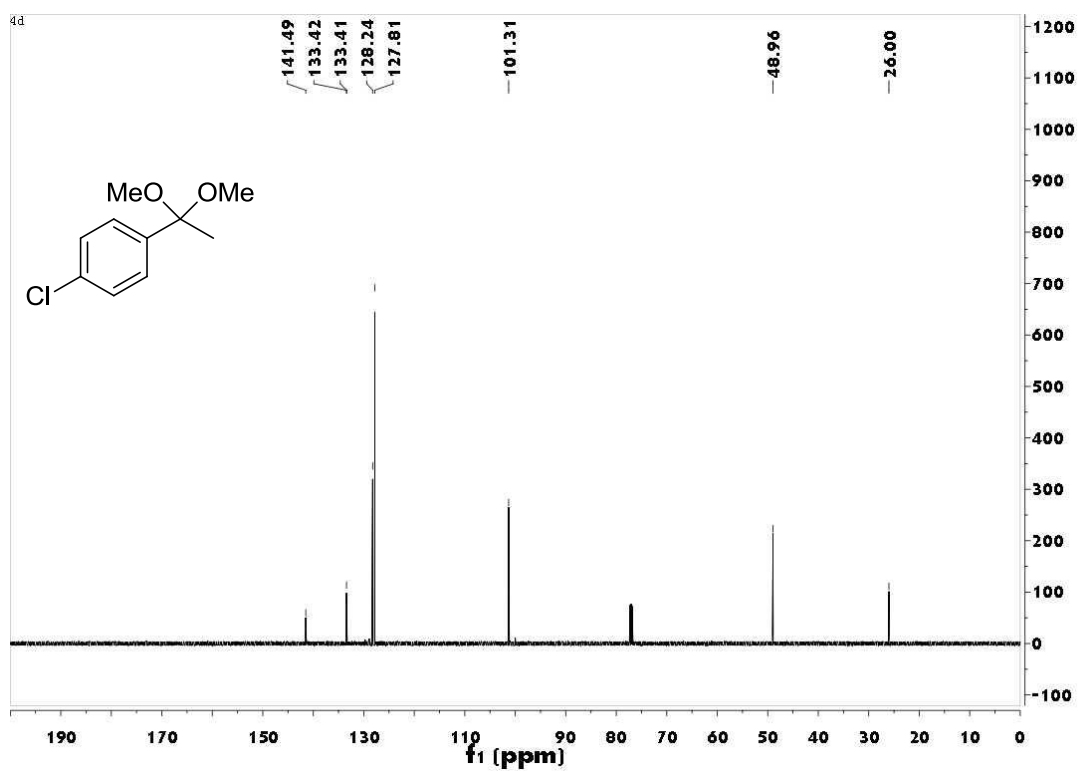

Figure S54:  $^{13}\text{C}$  NMR (151 MHz,  $\text{CDCl}_3$ ) of compound **4d**

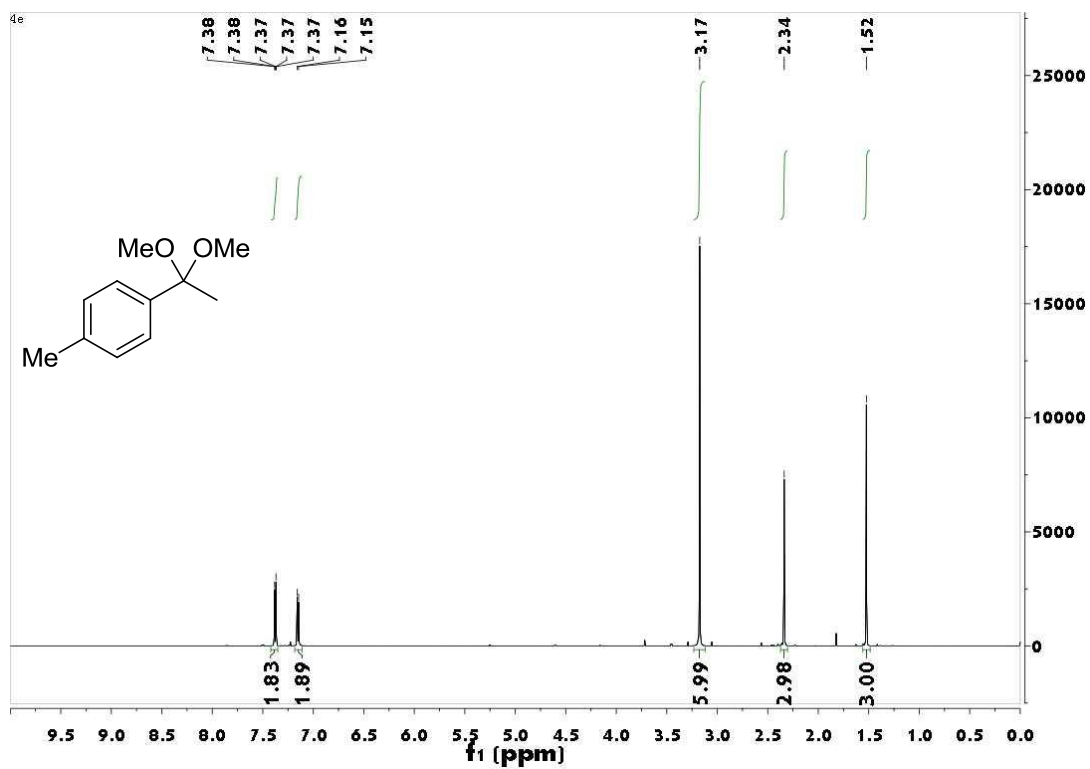

Figure S55:  $^1\text{H}$  NMR (600 MHz,  $\text{CDCl}_3$ ) of compound 4e

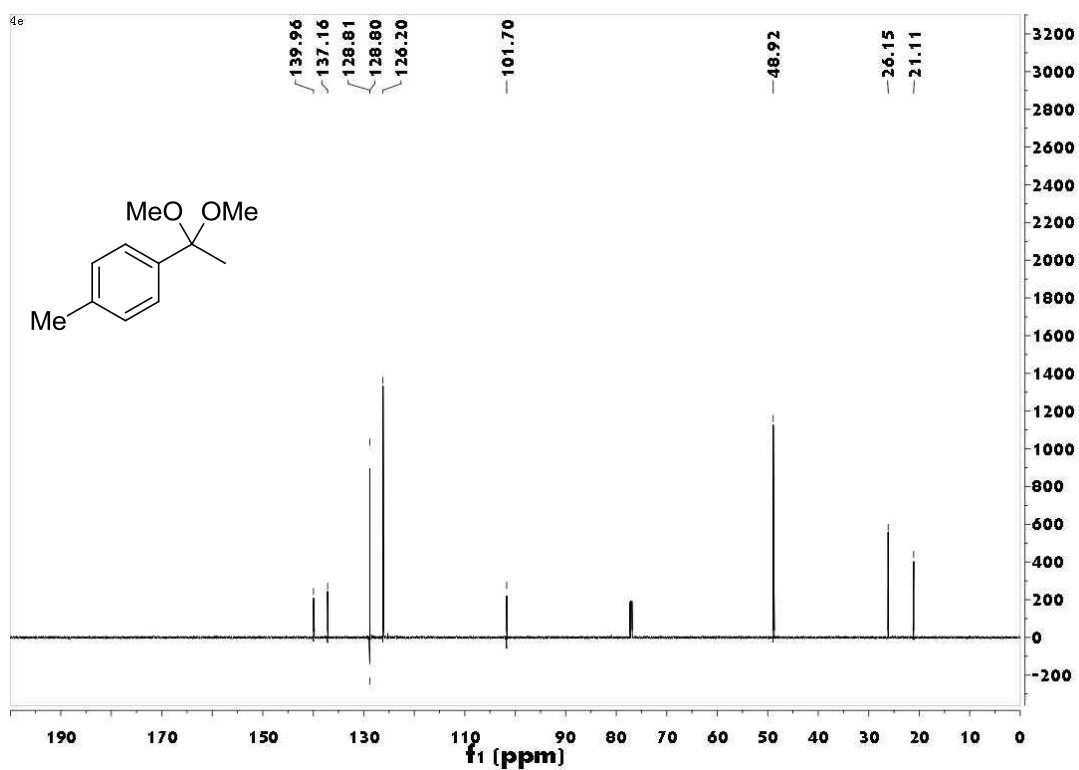

Figure S56:  $^{13}\text{C}$  NMR (151 MHz,  $\text{CDCl}_3$ ) of compound 4e

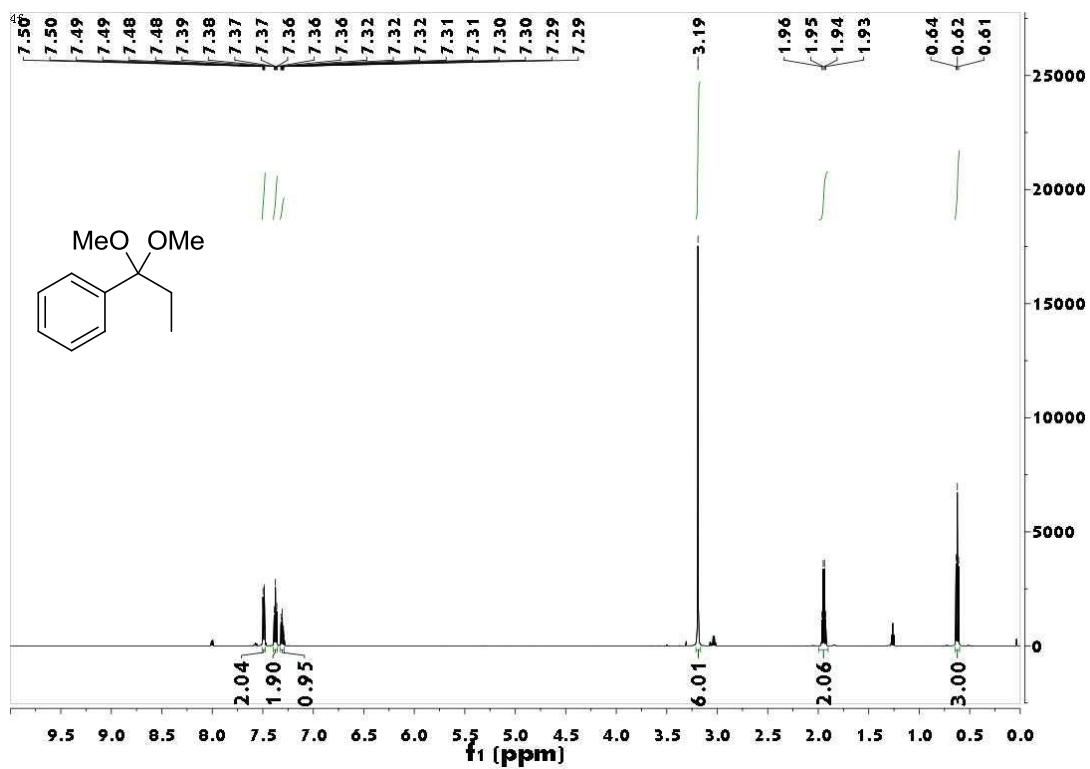

Figure S57:  $^1\text{H}$  NMR (600 MHz,  $\text{CDCl}_3$ ) of compound 4f

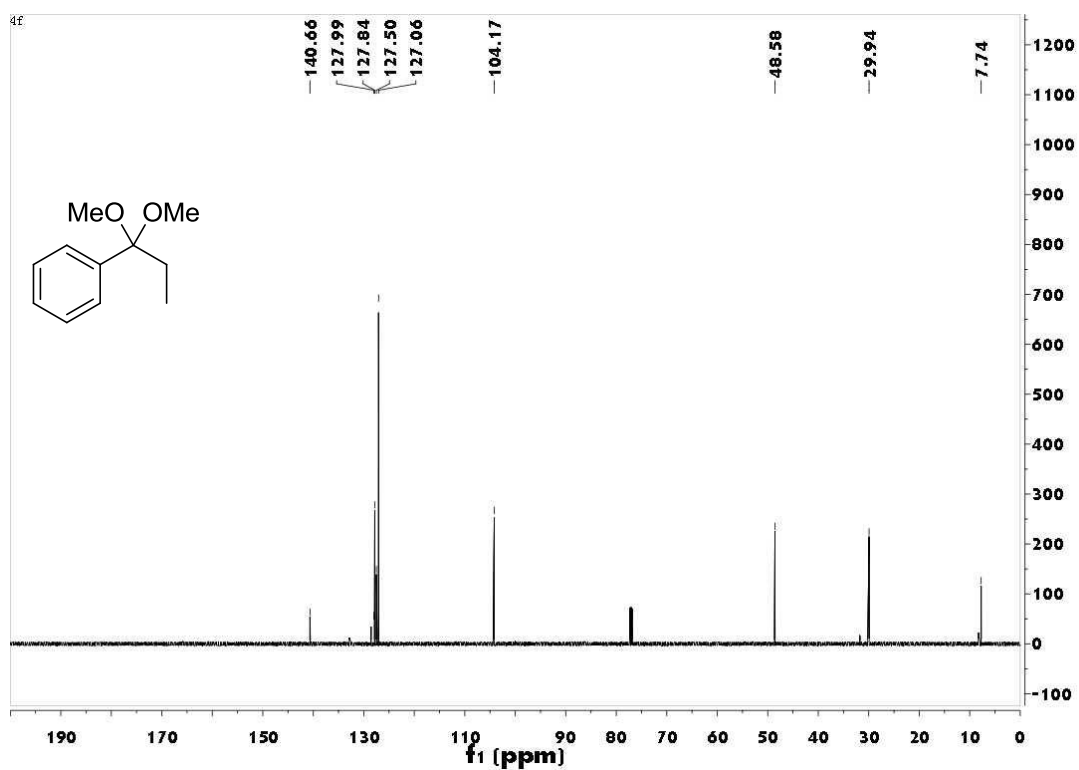

Figure S58:  $^{13}\text{C}$  NMR (151 MHz,  $\text{CDCl}_3$ ) of compound 4f

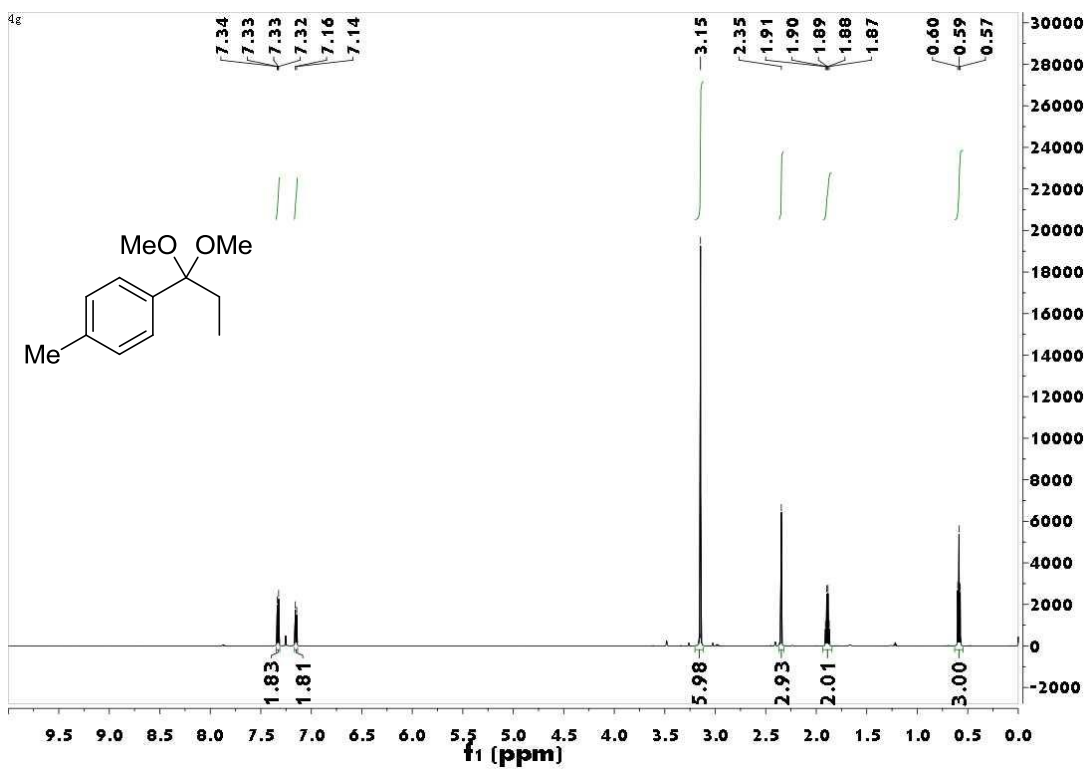

Figure S59:  $^1\text{H}$  NMR (600 MHz,  $\text{CDCl}_3$ ) of compound 4g

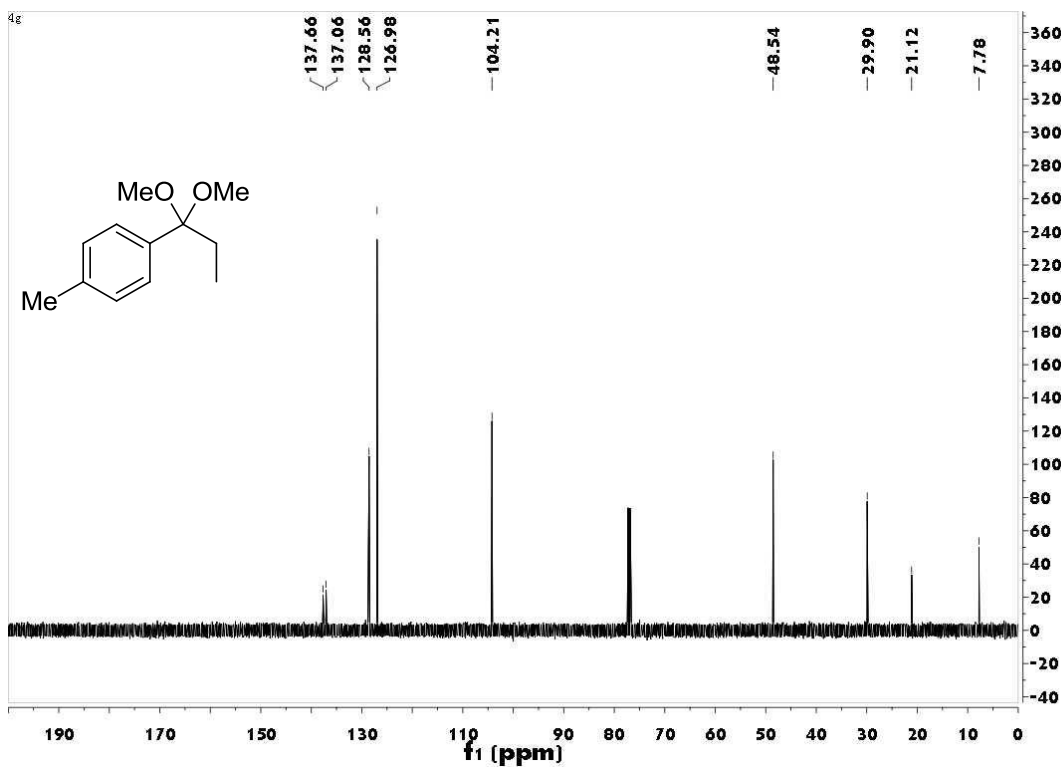

Figure S60:  $^{13}\text{C}$  NMR (151 MHz,  $\text{CDCl}_3$ ) of compound 4g

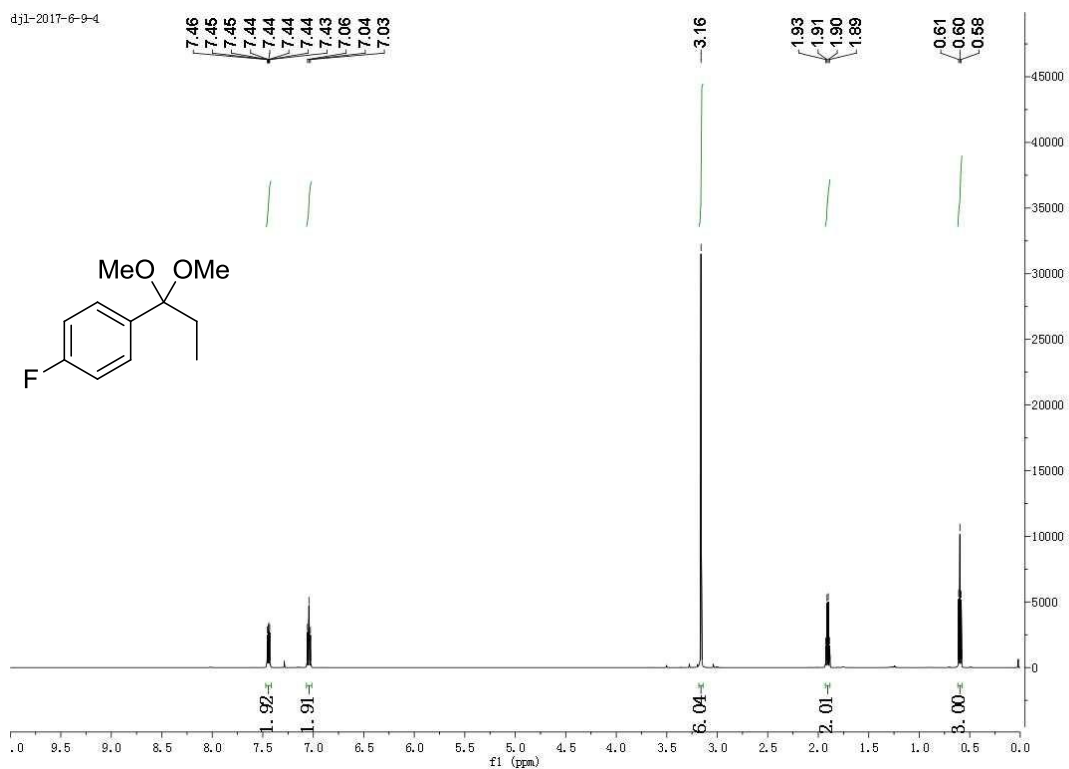

**Figure S61:**  $^1\text{H}$  NMR (600 MHz,  $\text{CDCl}_3$ ) of compound **4h**

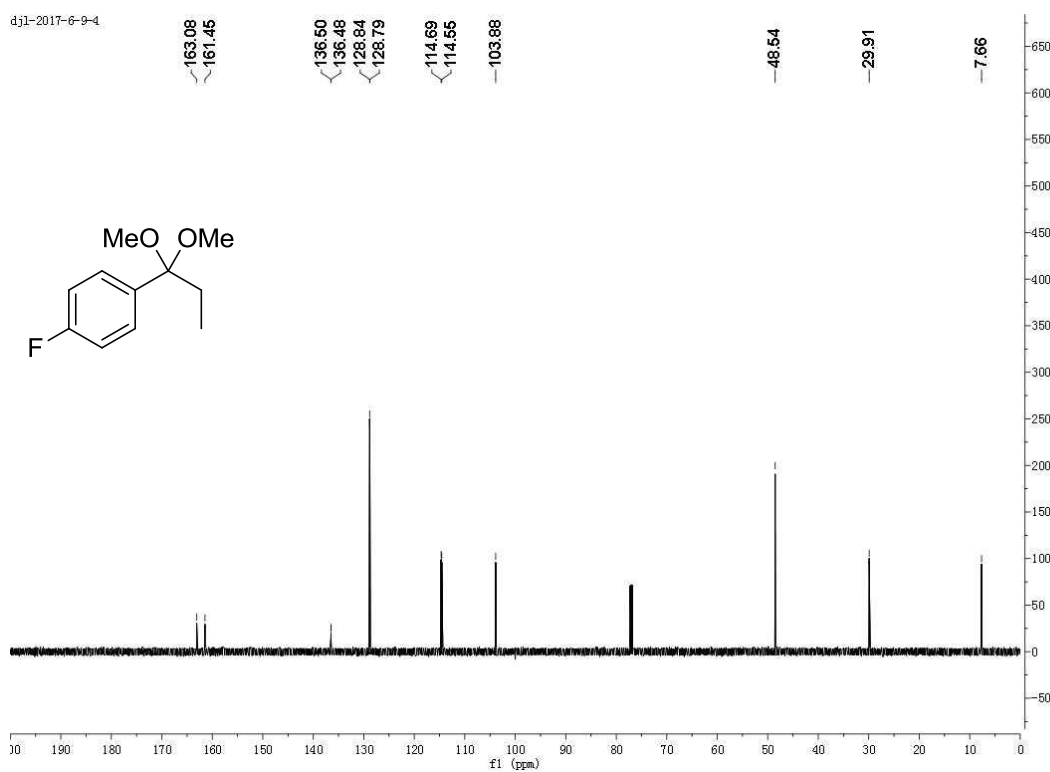

**Figure S62:**  $^{13}\text{C}$  NMR (151 MHz,  $\text{CDCl}_3$ ) of compound **4h**



djl-2017-7-24-8

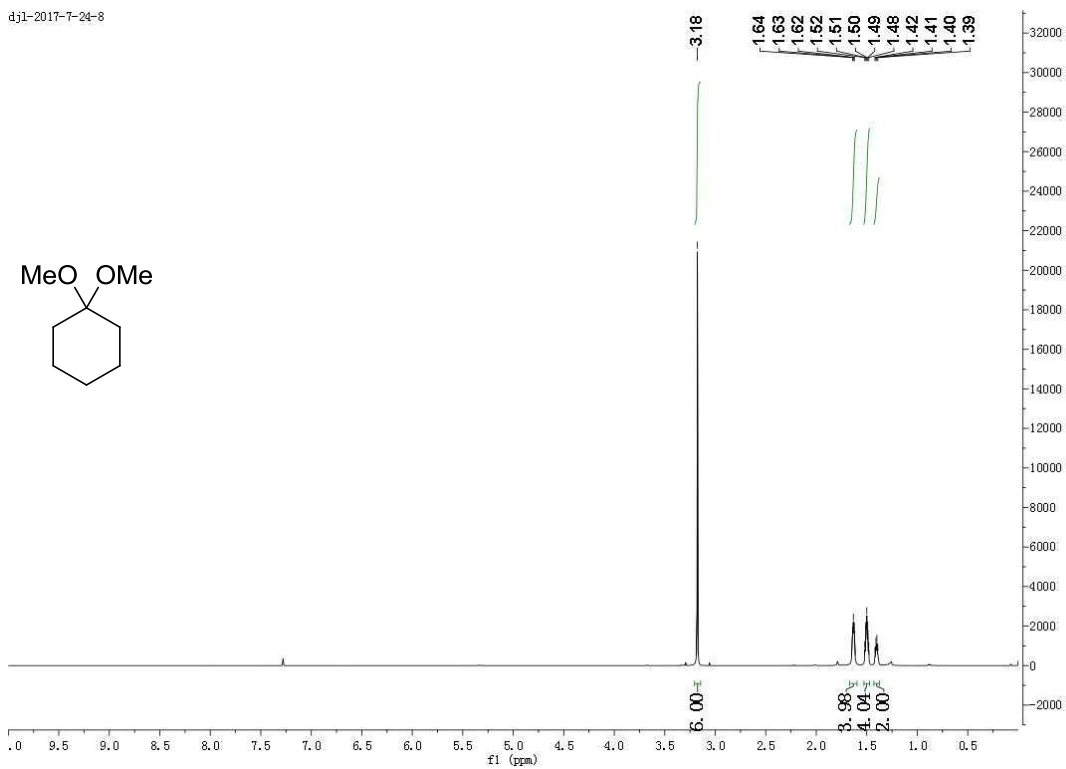

Figure S63: <sup>1</sup>H NMR (600 MHz, CDCl<sub>3</sub>) of compound 4i

djl-2017-7-24-8

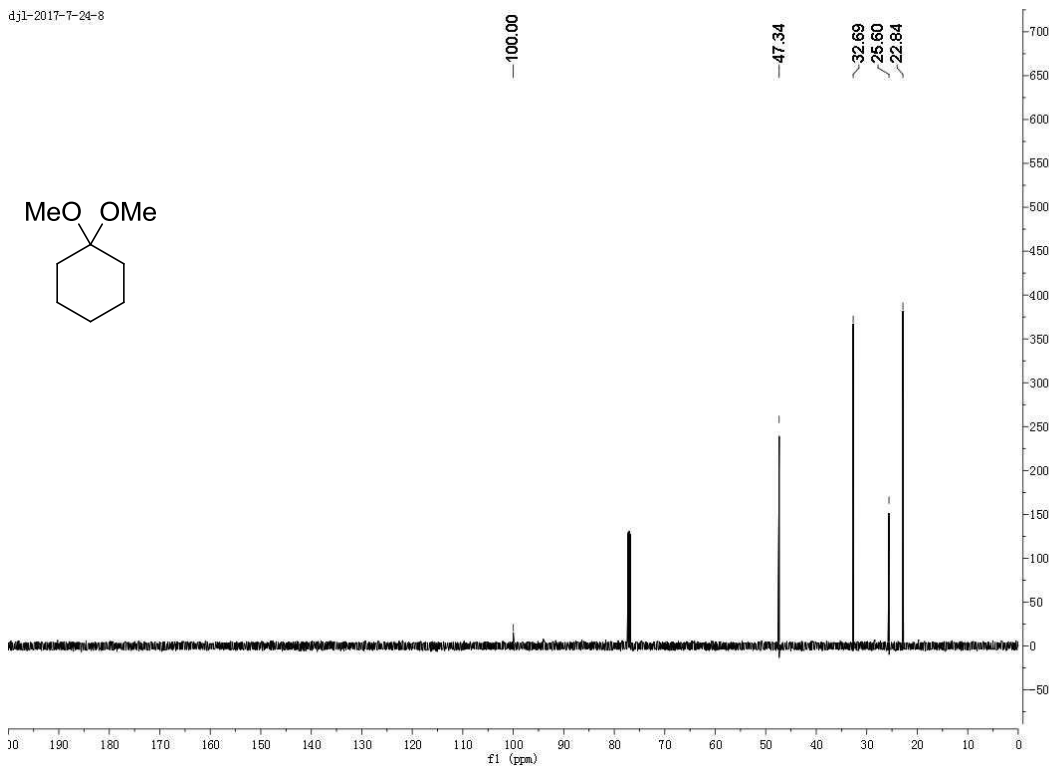

Figure S64: <sup>13</sup>C NMR (151 MHz, CDCl<sub>3</sub>) of compound 4i

djl-2017-7-24-1

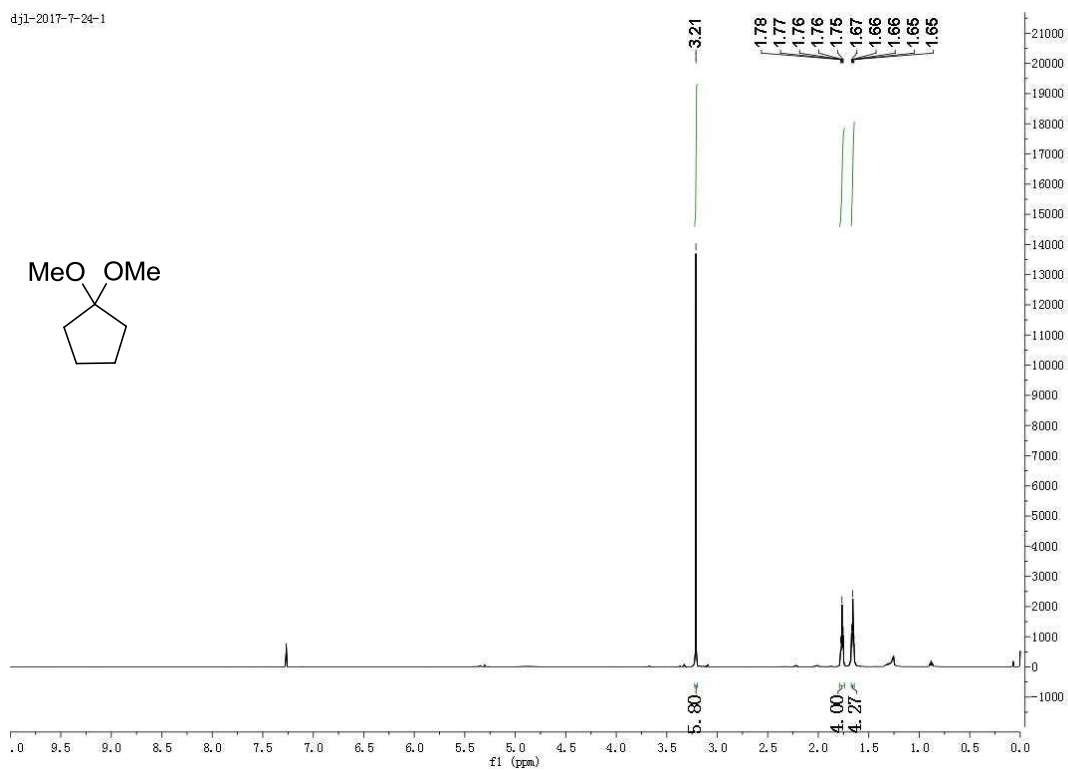

Figure S65:  $^1\text{H NMR}$  (600 MHz,  $\text{CDCl}_3$ ) of compound 4j

djl-2017-7-24-1

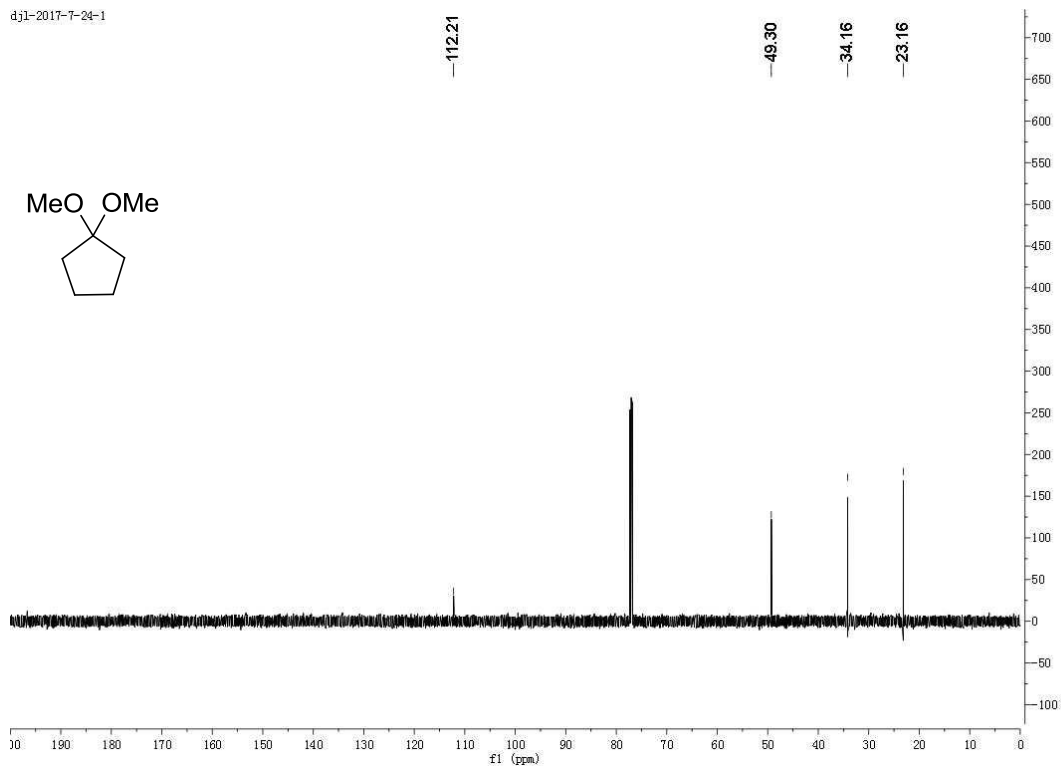

Figure S66:  $^{13}\text{C NMR}$  (151 MHz,  $\text{CDCl}_3$ ) of compound 4j

djl-2017-6-23-1

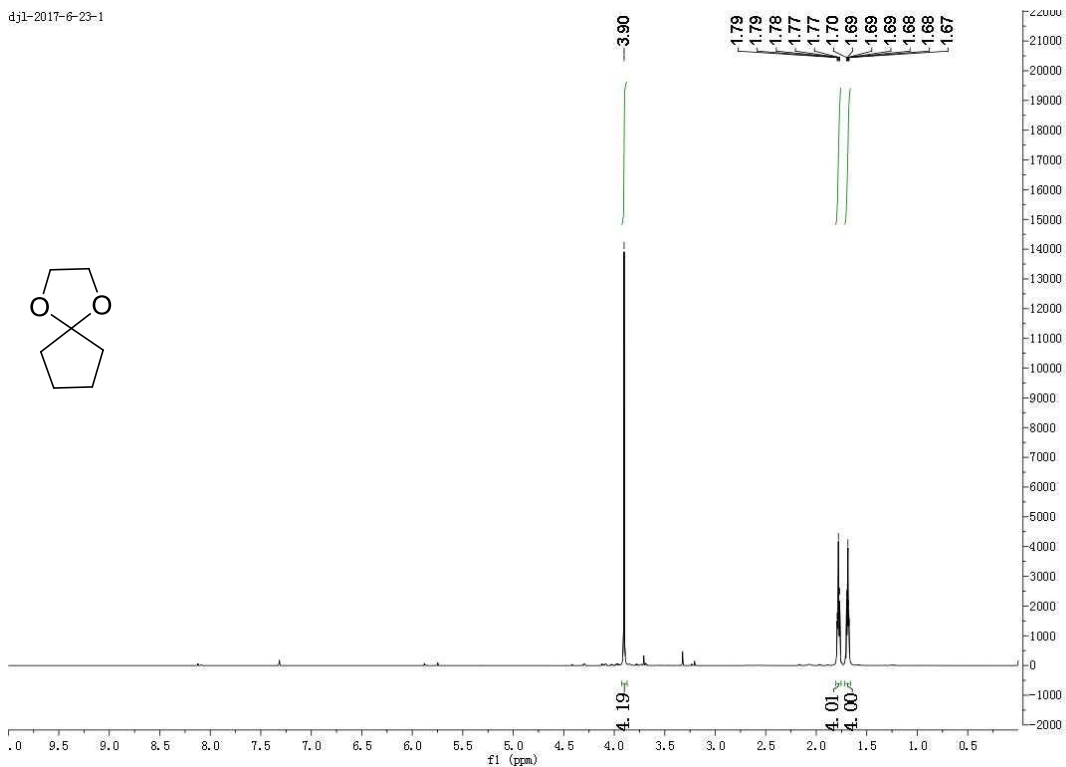

**Figure S67:**  $^1\text{H}$  NMR (600 MHz,  $\text{CDCl}_3$ ) of compound **4j'**

djl-2017-6-23-1

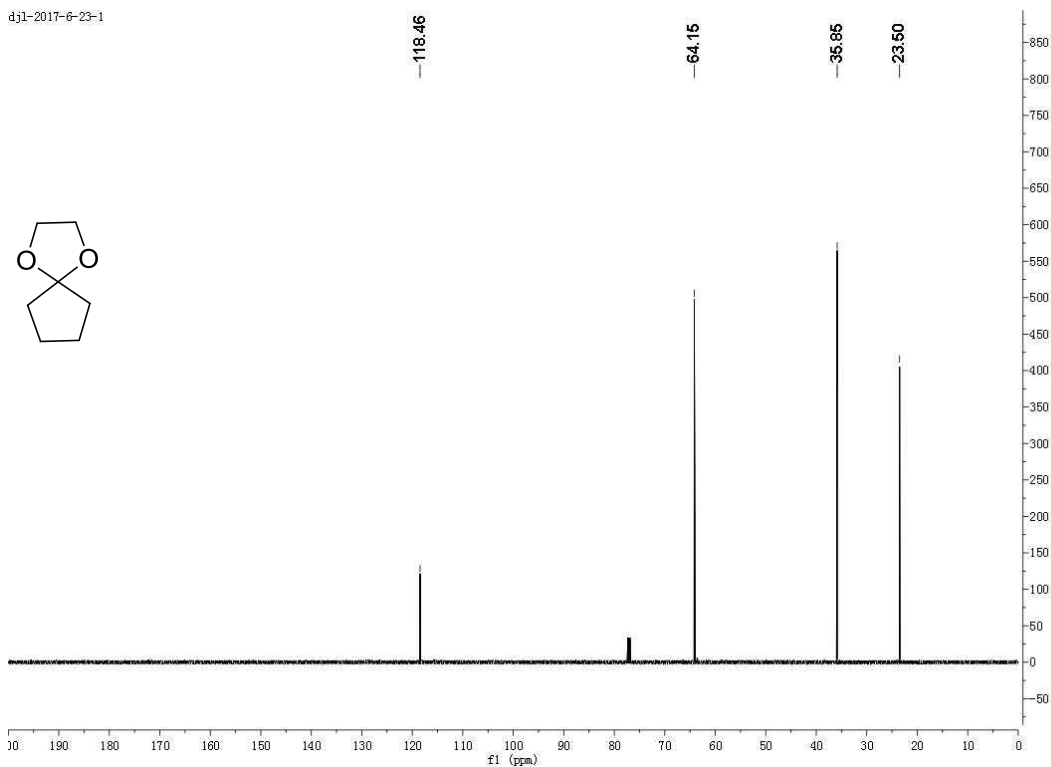

**Figure S68:**  $^{13}\text{C}$  NMR (151 MHz,  $\text{CDCl}_3$ ) of compound **4j'**

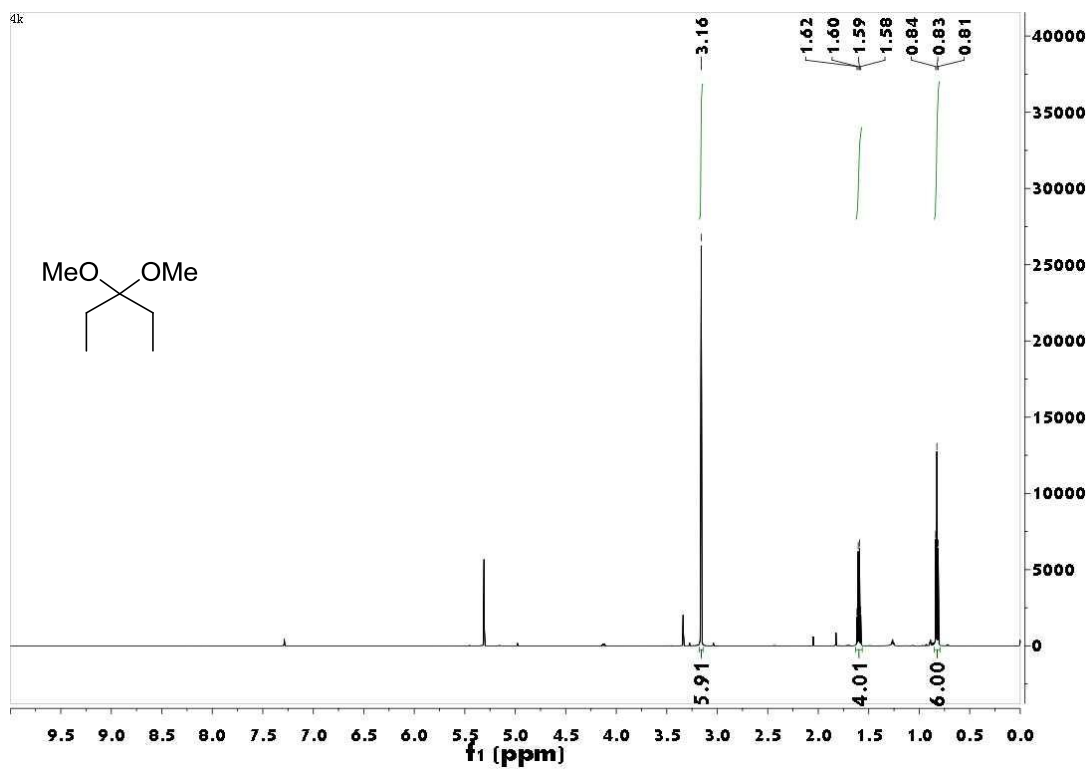

**Figure S69:**  $^1\text{H NMR}$  (600 MHz,  $\text{CDCl}_3$ ) of compound **4k**

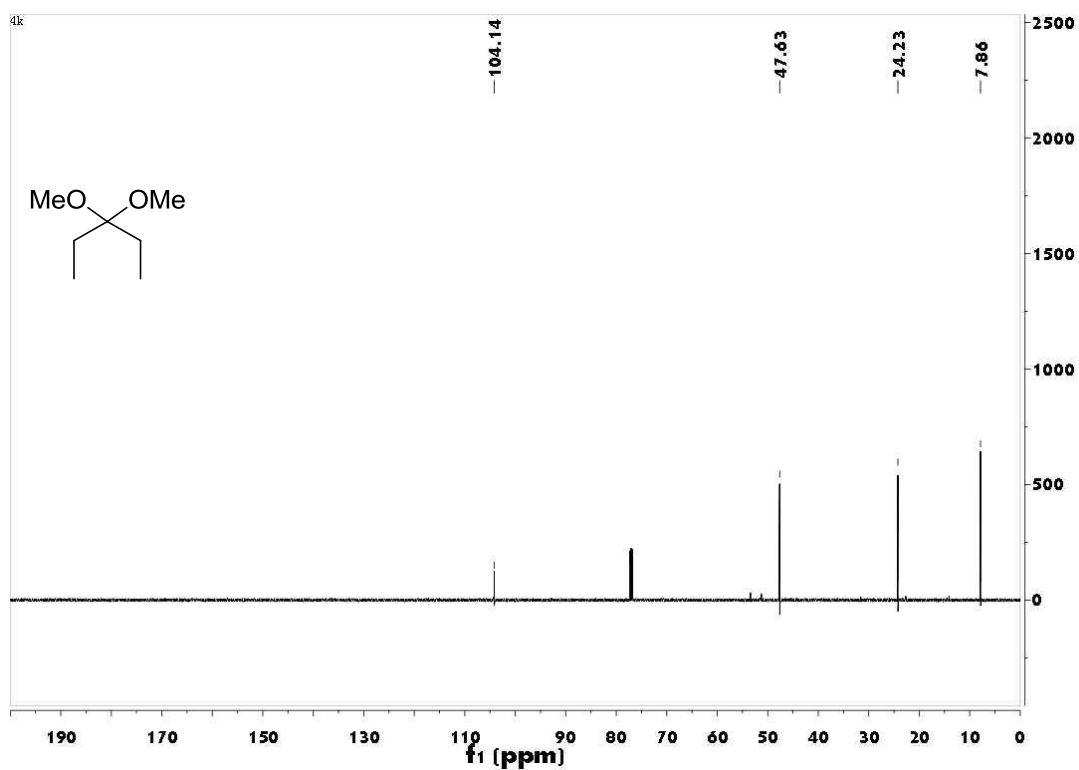

**Figure S70:**  $^{13}\text{C NMR}$  (151 MHz,  $\text{CDCl}_3$ ) of compound **4k**

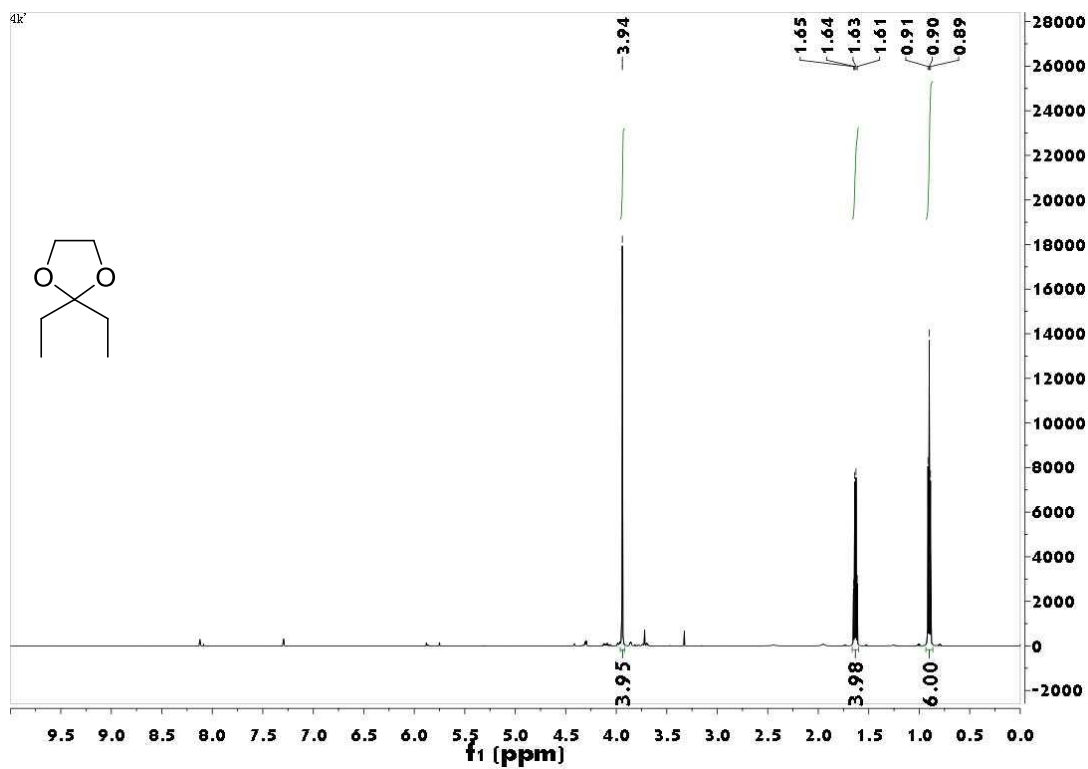

Figure S71:  $^1\text{H}$  NMR (600 MHz,  $\text{CDCl}_3$ ) of compound 4k'

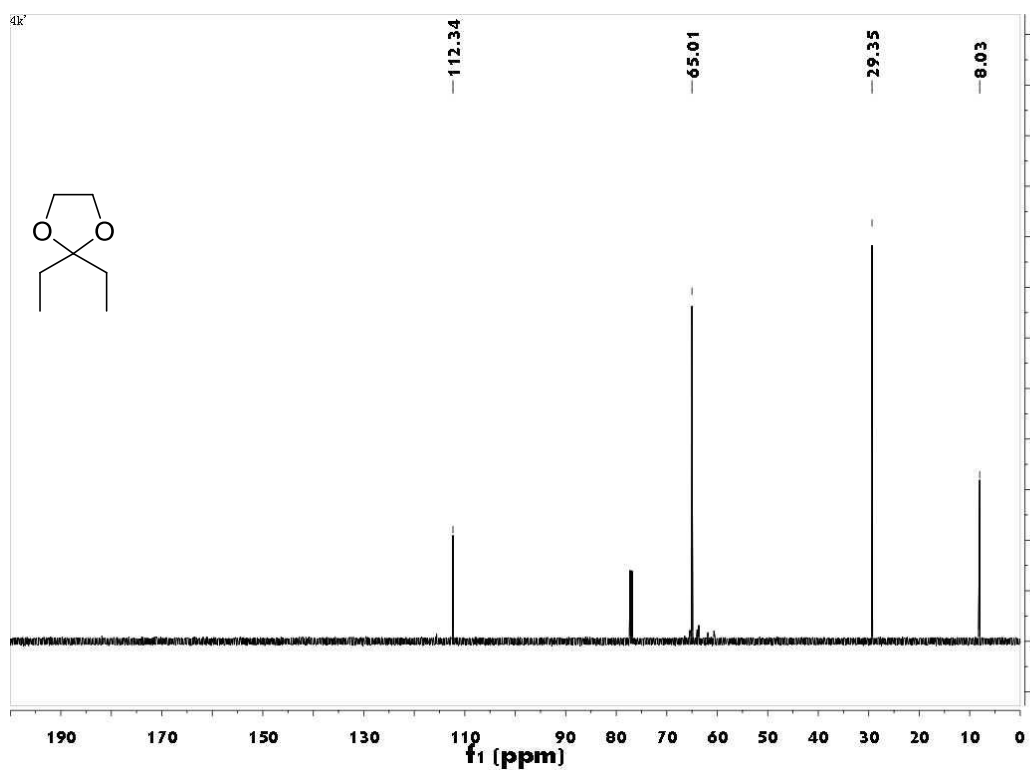

Figure S72:  $^{13}\text{C}$  NMR (151 MHz,  $\text{CDCl}_3$ ) of compound 4k'

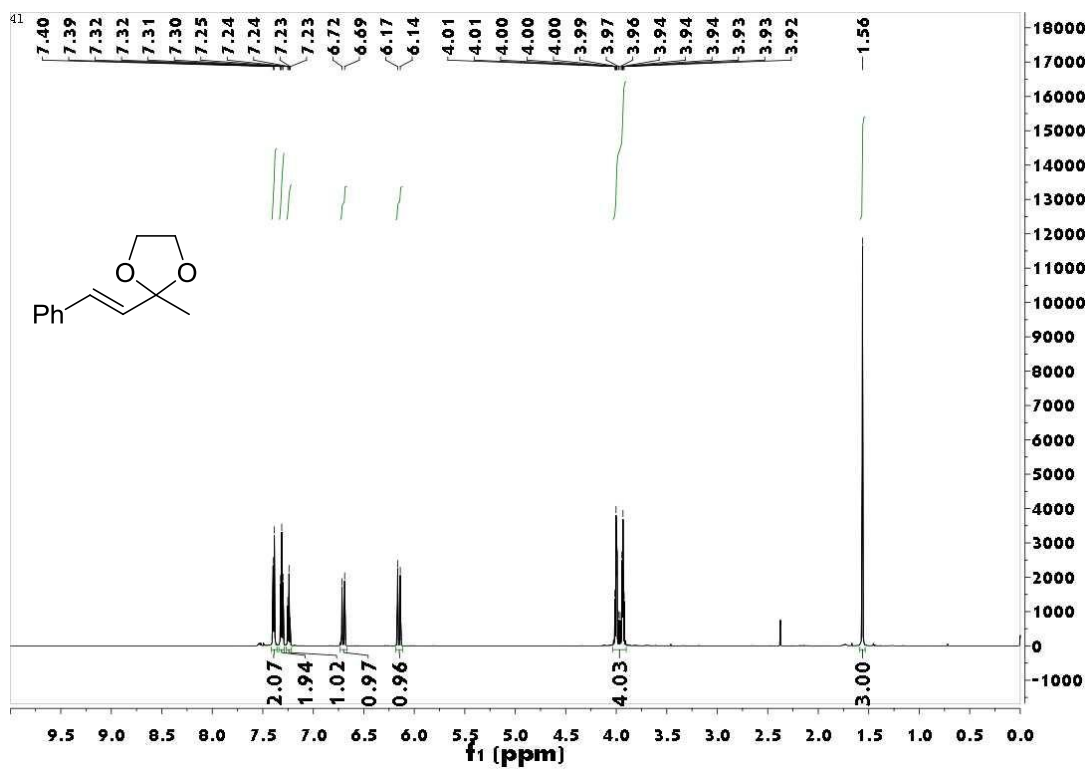

Figure S73:  $^1\text{H}$  NMR (600 MHz,  $\text{CDCl}_3$ ) of compound 4I

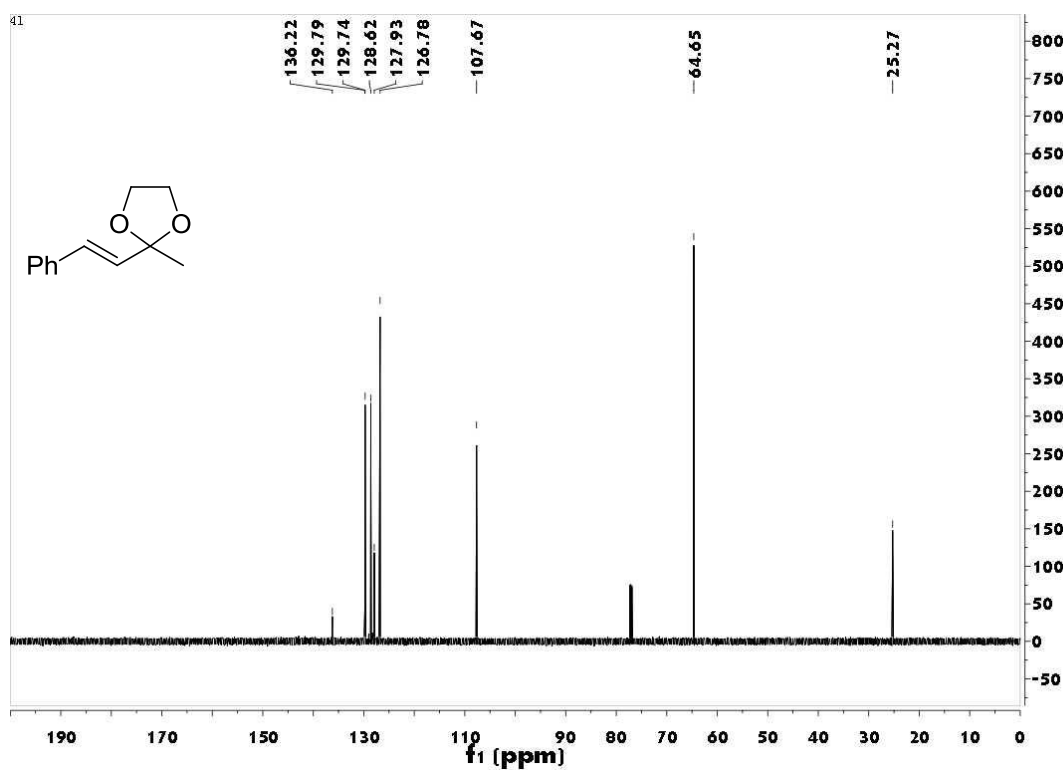

Figure S74:  $^{13}\text{C}$  NMR (151 MHz,  $\text{CDCl}_3$ ) of compound 4I

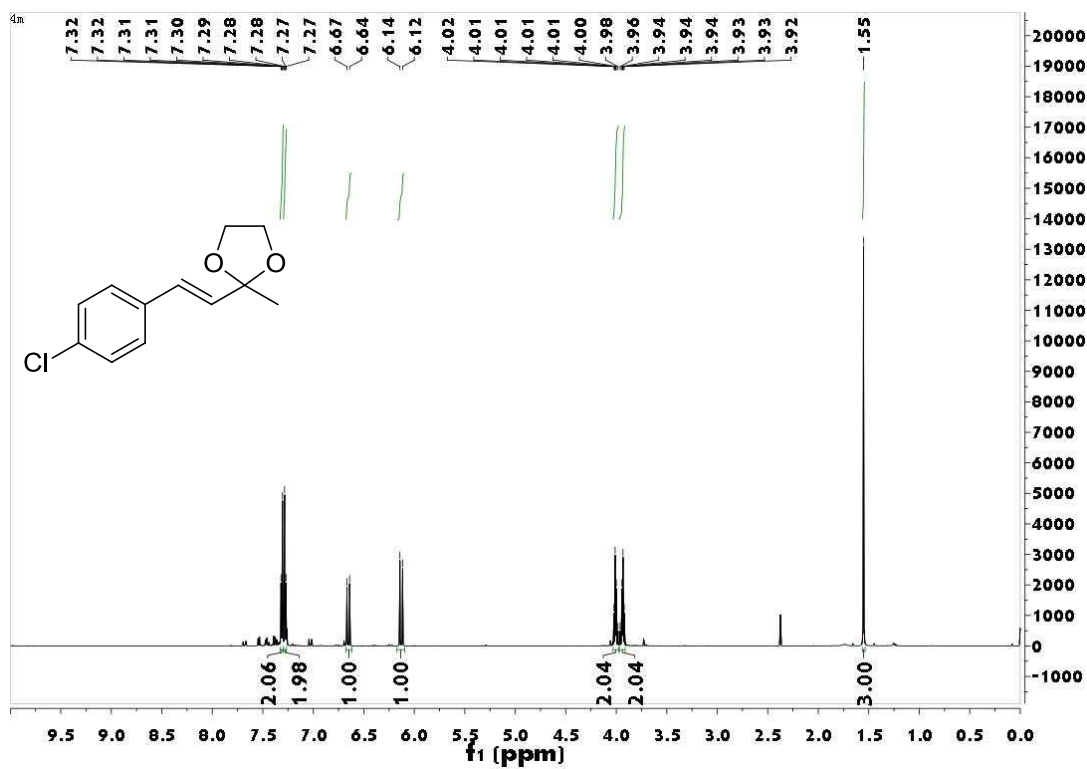

Figure S75:  $^1\text{H}$  NMR (600 MHz,  $\text{CDCl}_3$ ) of compound 4m

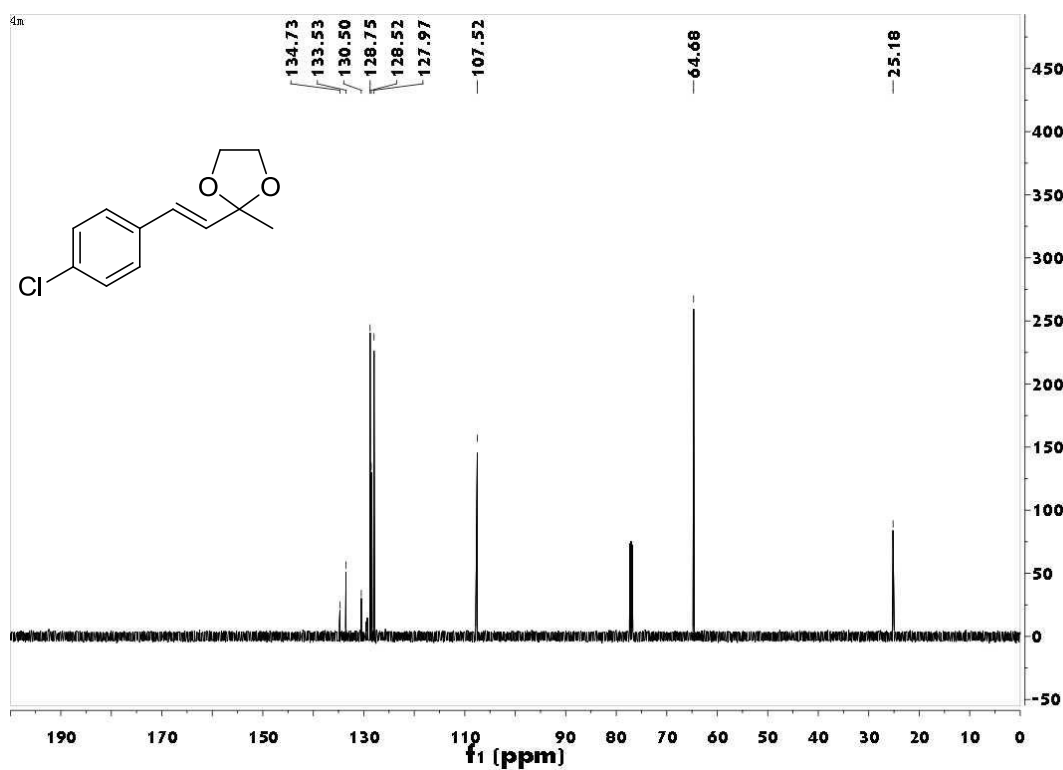

Figure S76:  $^{13}\text{C}$  NMR (151 MHz,  $\text{CDCl}_3$ ) of compound 4m

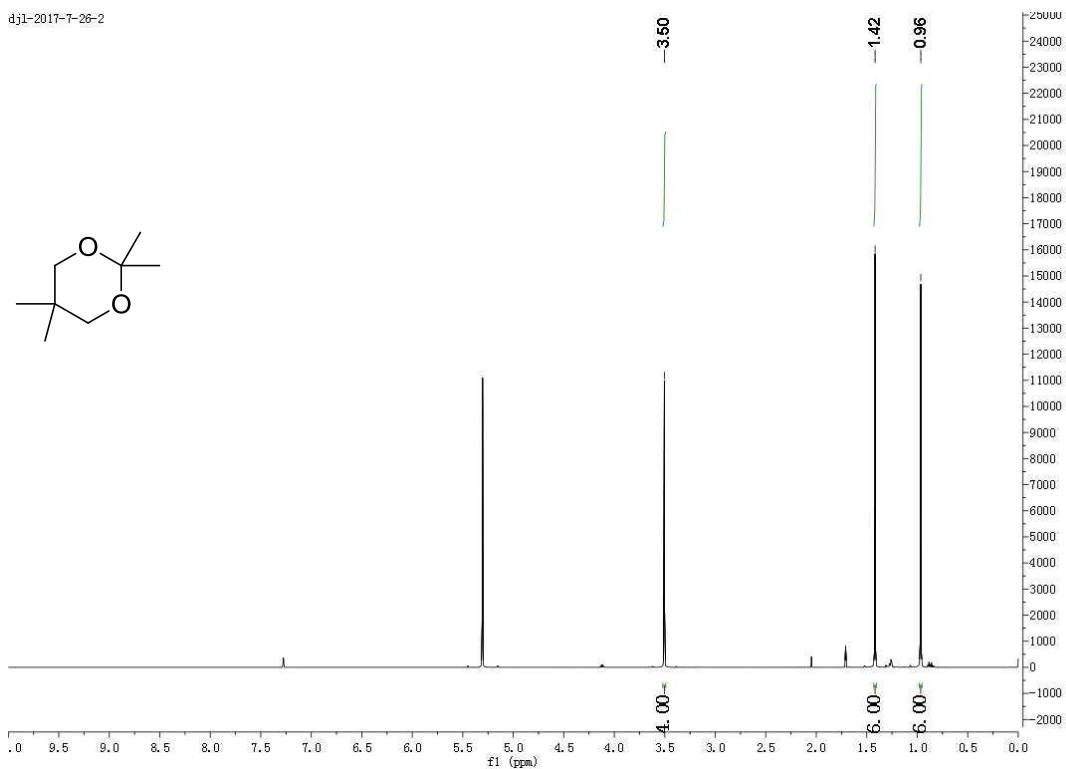

**Figure S77:**  $^1\text{H}$  NMR (600 MHz,  $\text{CDCl}_3$ ) of compound **6a**

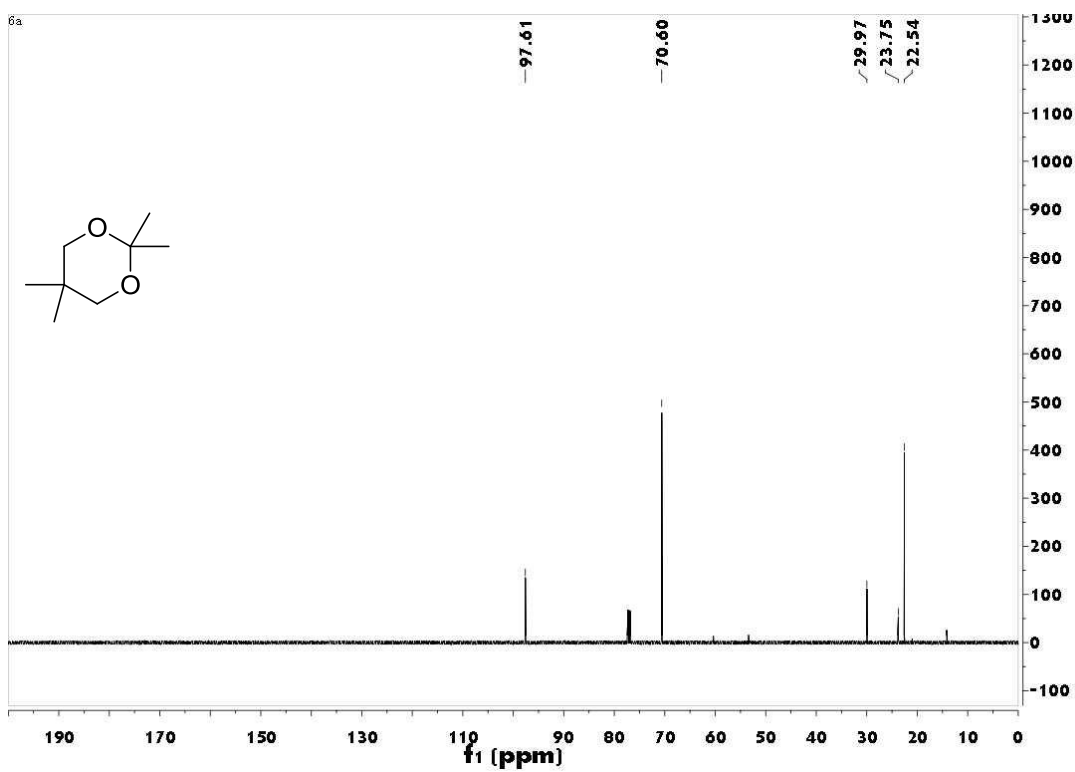

**Figure S78:**  $^{13}\text{C}$  NMR (151 MHz,  $\text{CDCl}_3$ ) of compound **6a**



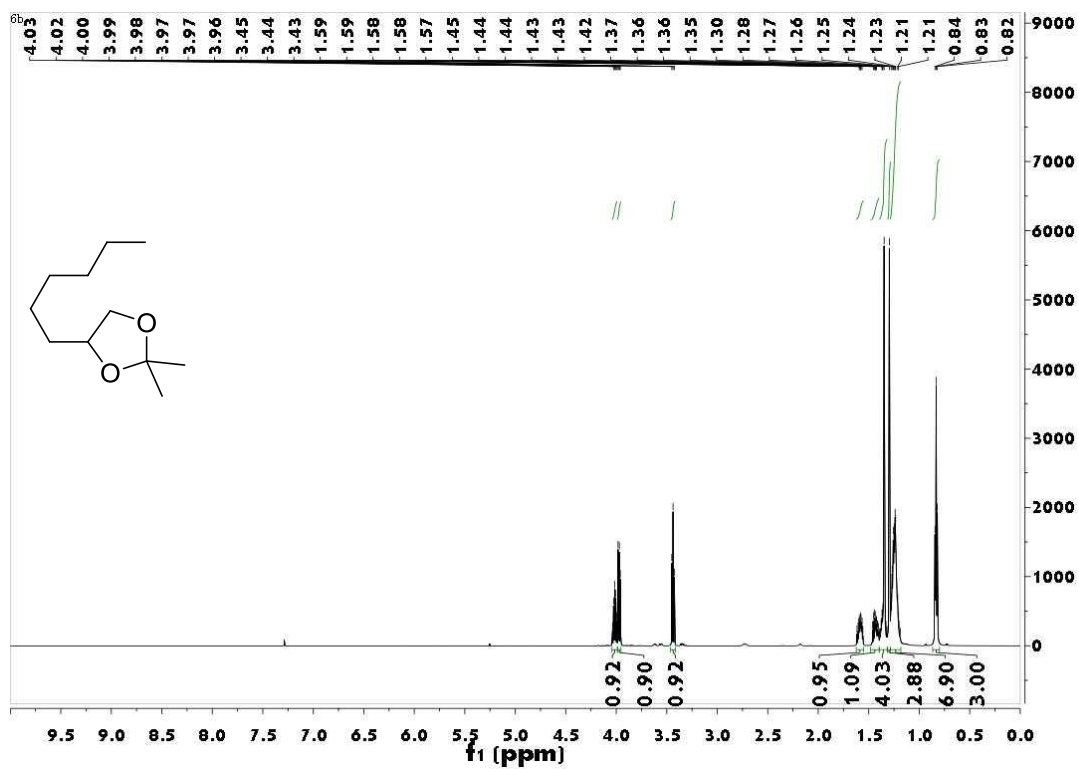

Figure S79:  $^1\text{H}$  NMR (600 MHz,  $\text{CDCl}_3$ ) of compound 6b

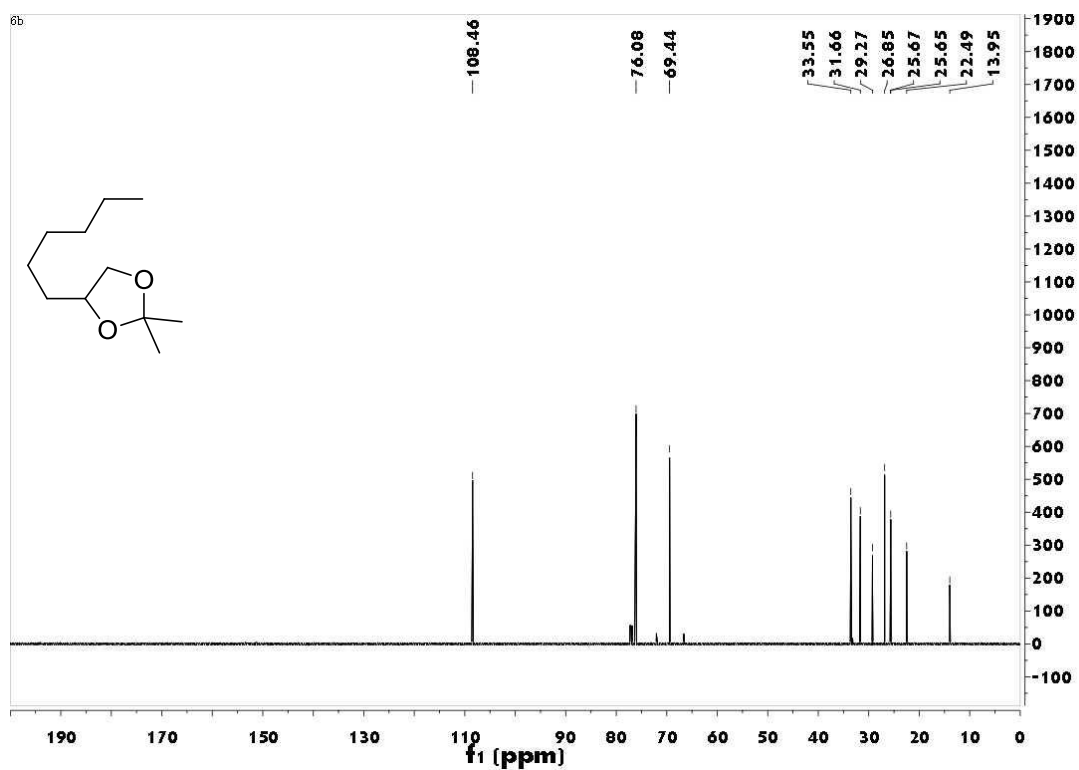

Figure S80:  $^{13}\text{C}$  NMR (151 MHz,  $\text{CDCl}_3$ ) of compound 6b

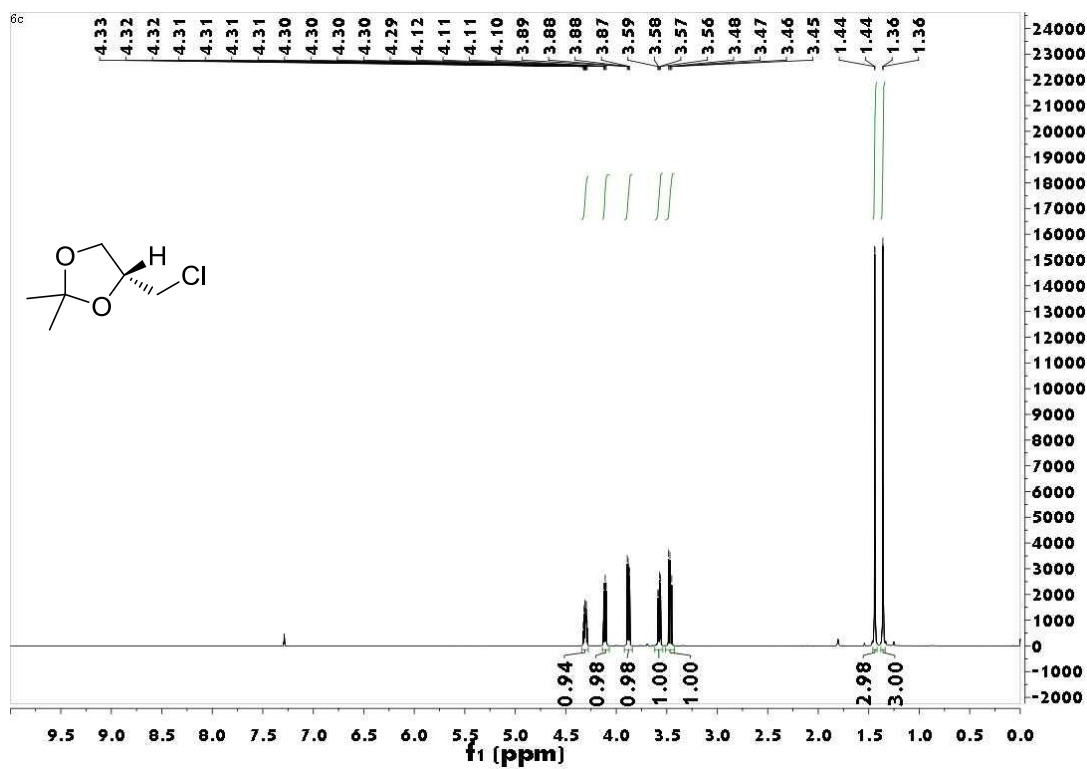

Figure S81: <sup>1</sup>H NMR (600 MHz, CDCl<sub>3</sub>) of compound 6c

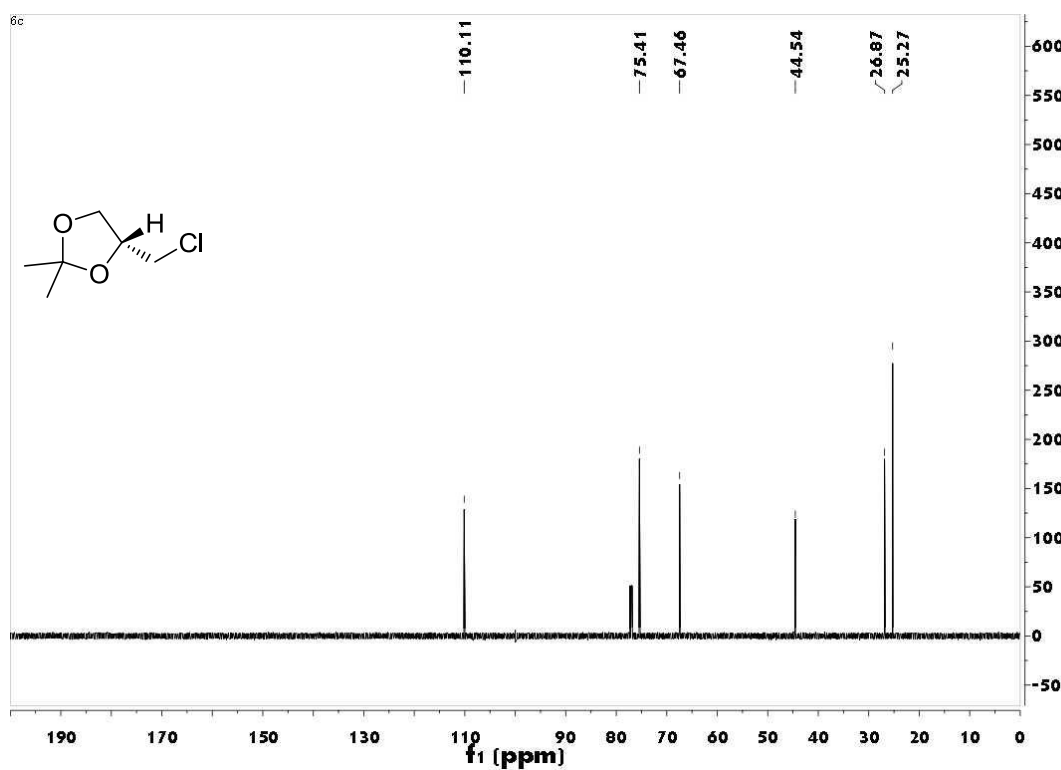

Figure S82: <sup>13</sup>C NMR (151 MHz, CDCl<sub>3</sub>) of compound 6c

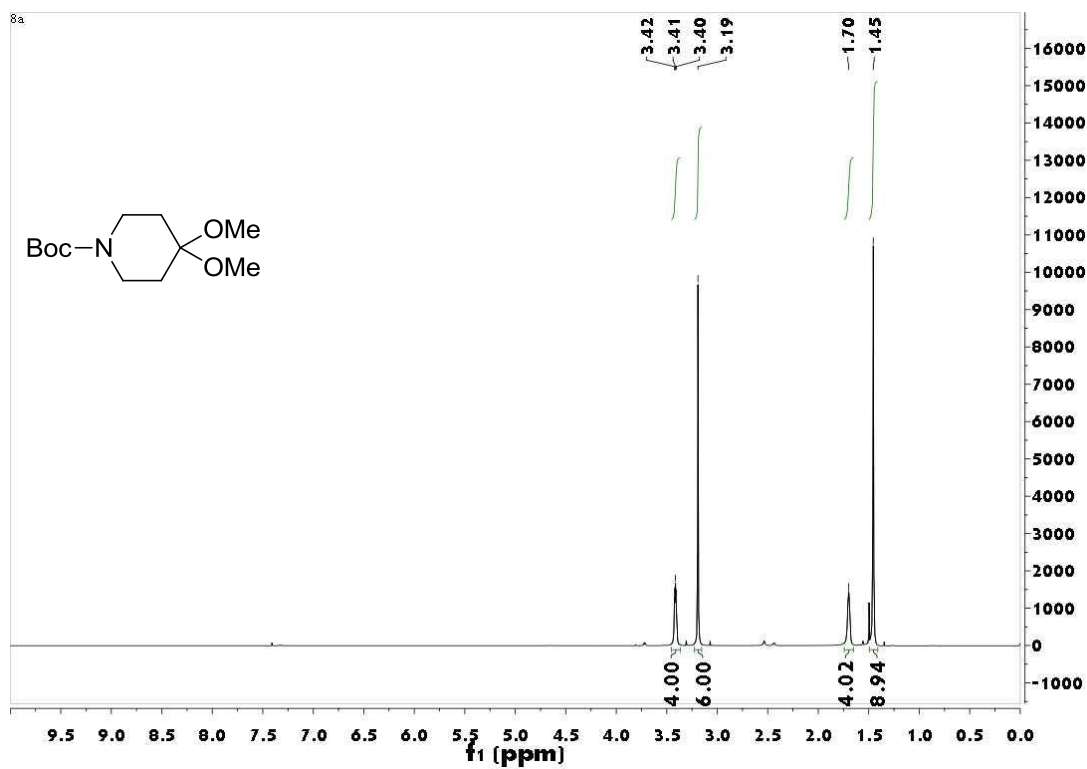

Figure S83:  $^1\text{H}$  NMR (600 MHz,  $\text{CDCl}_3$ ) of compound 8a

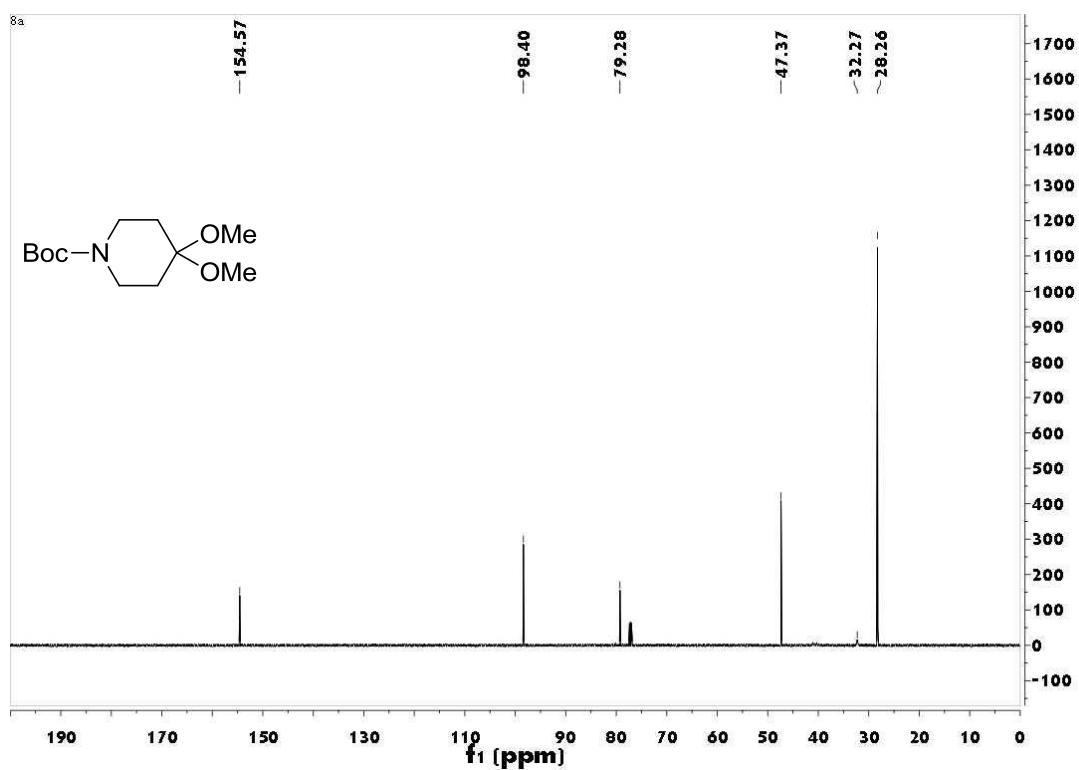

Figure S84:  $^{13}\text{C}$  NMR (151 MHz,  $\text{CDCl}_3$ ) of compound 8a

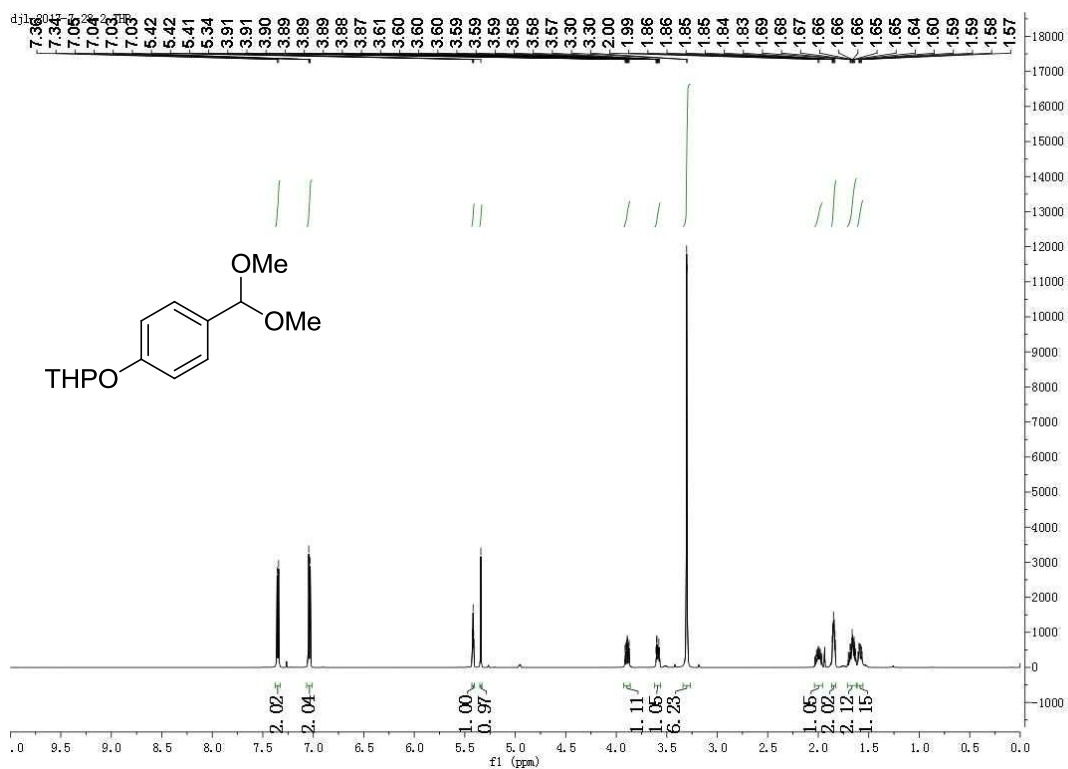

**Figure S85:** <sup>1</sup>H NMR (600 MHz, CDCl<sub>3</sub>) of compound **8b**

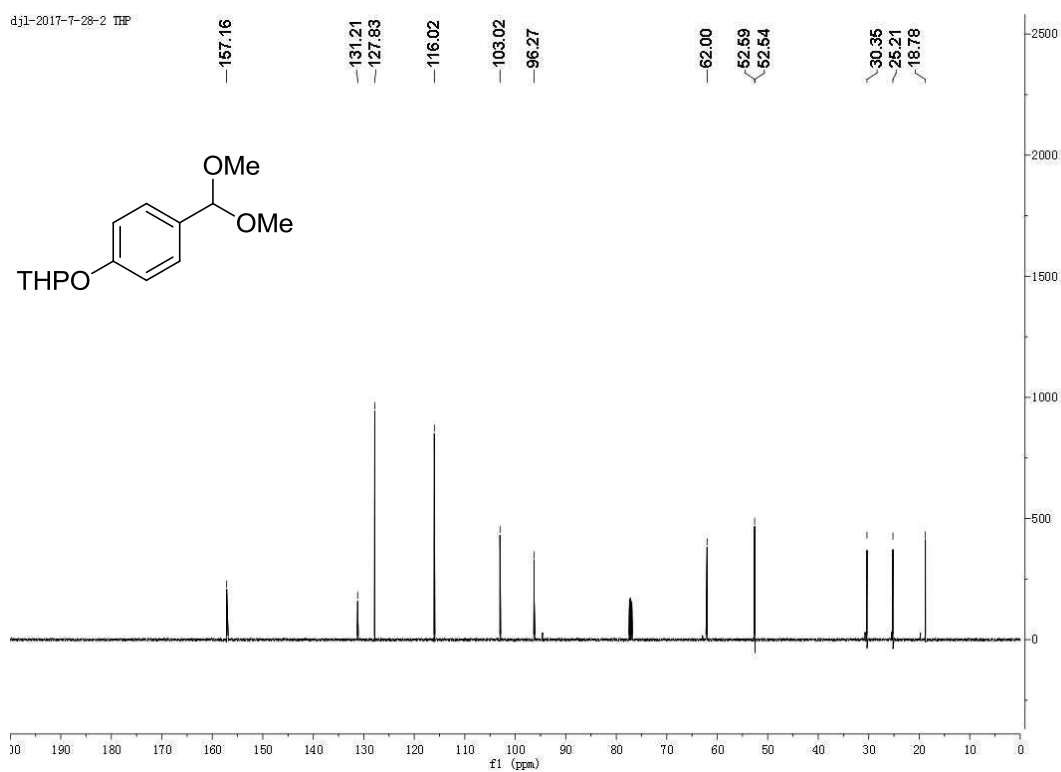

**Figure S86:** <sup>13</sup>C NMR (151 MHz, CDCl<sub>3</sub>) of compound **8b**

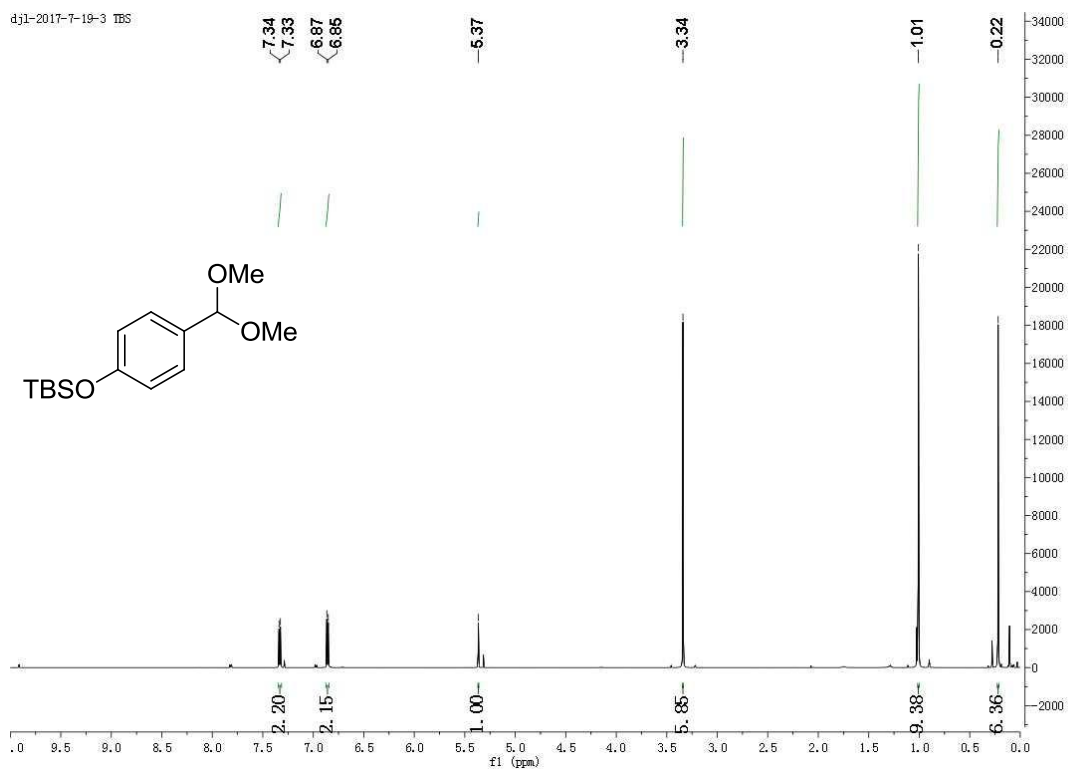

**Figure S87:**  $^1\text{H}$  NMR (600 MHz,  $\text{CDCl}_3$ ) of compound **8c**

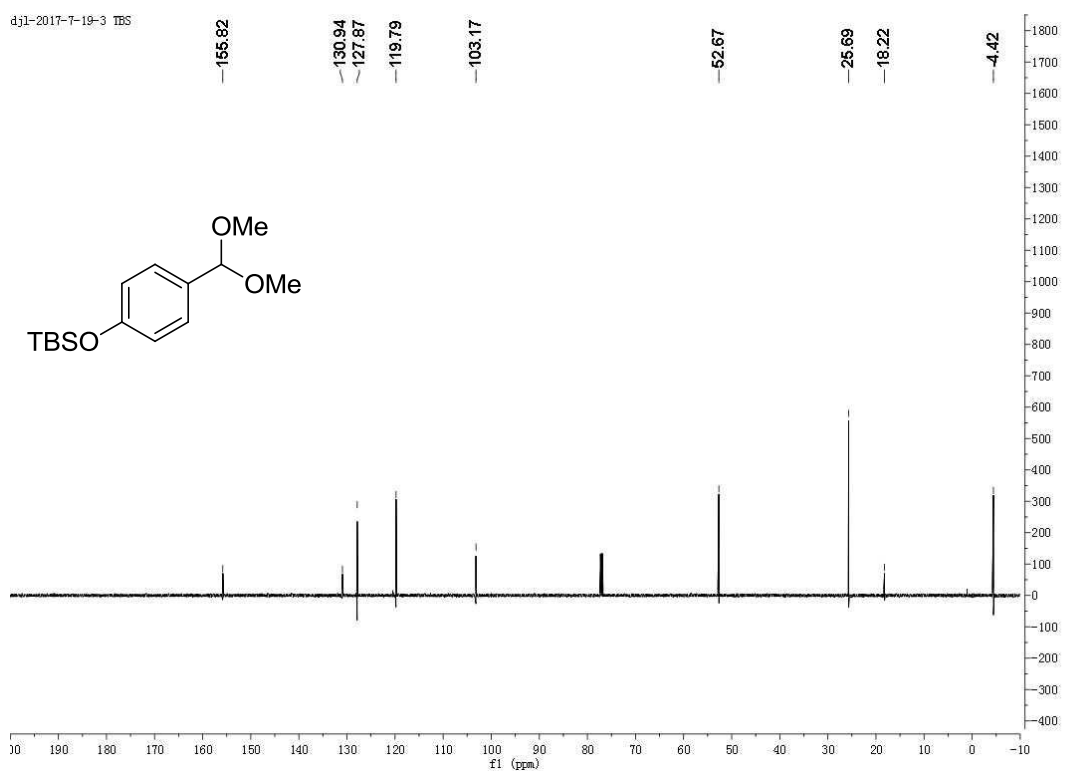

**Figure S88:**  $^{13}\text{C}$  NMR (151 MHz,  $\text{CDCl}_3$ ) of compound **8c**

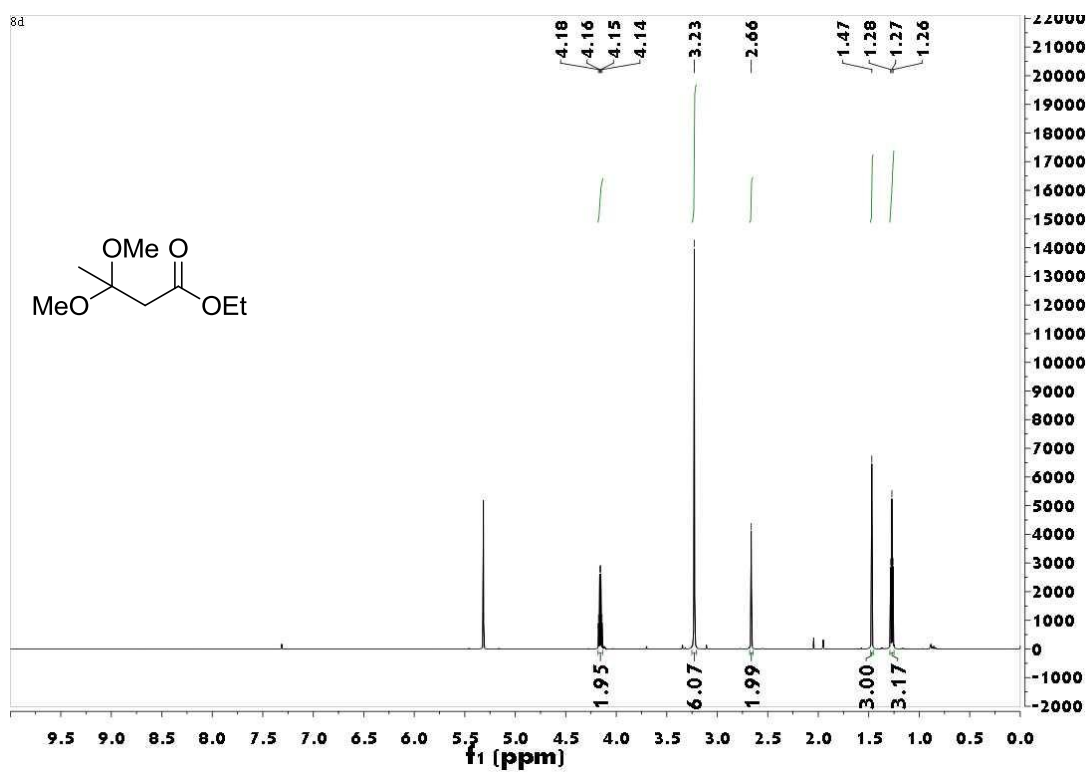

Figure S89:  $^1\text{H}$  NMR (600 MHz,  $\text{CDCl}_3$ ) of compound 8d

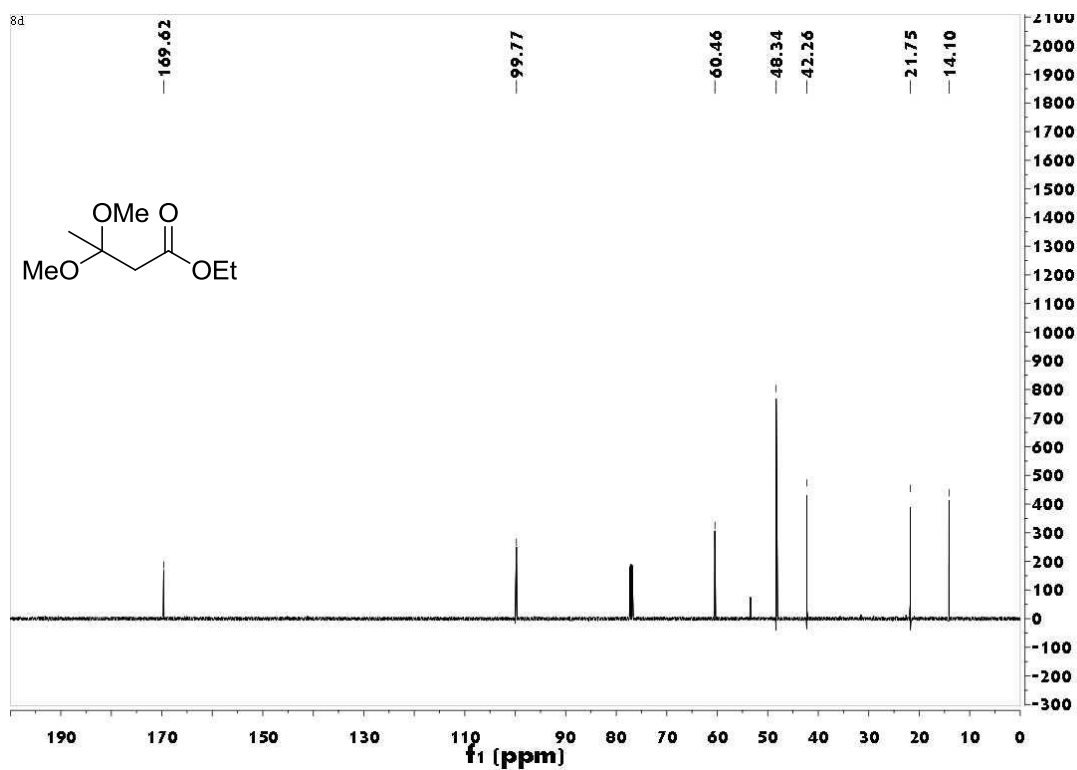

Figure S90:  $^{13}\text{C}$  NMR (151 MHz,  $\text{CDCl}_3$ ) of compound 8d

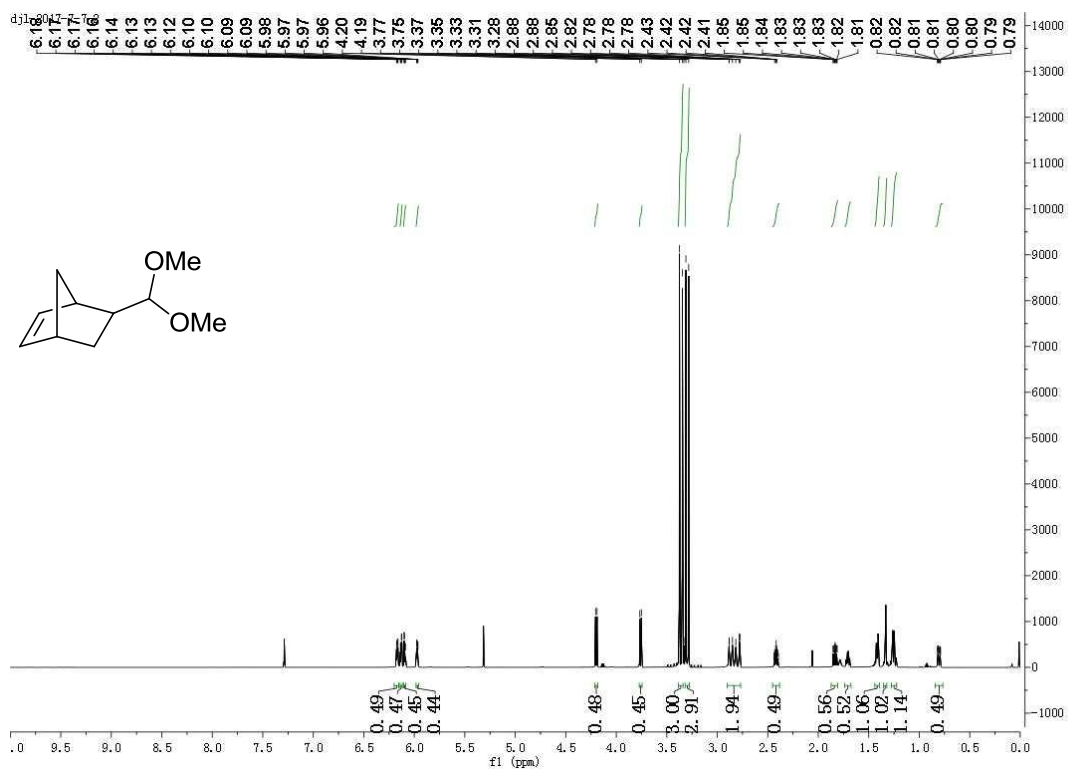

**Figure S91:** <sup>1</sup>H NMR (600 MHz, CDCl<sub>3</sub>) of compound **8e**

dj1-2017-7-7-2

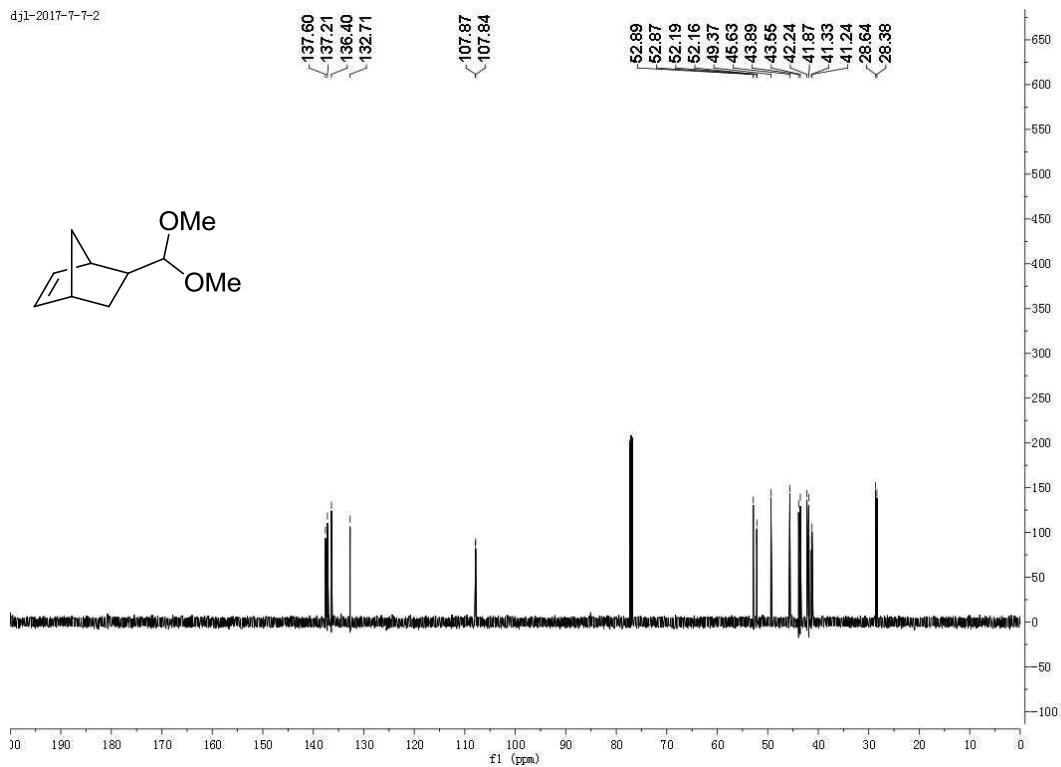

**Figure S92:** <sup>13</sup>C NMR (151 MHz, CDCl<sub>3</sub>) of compound **8e**

20170813-1

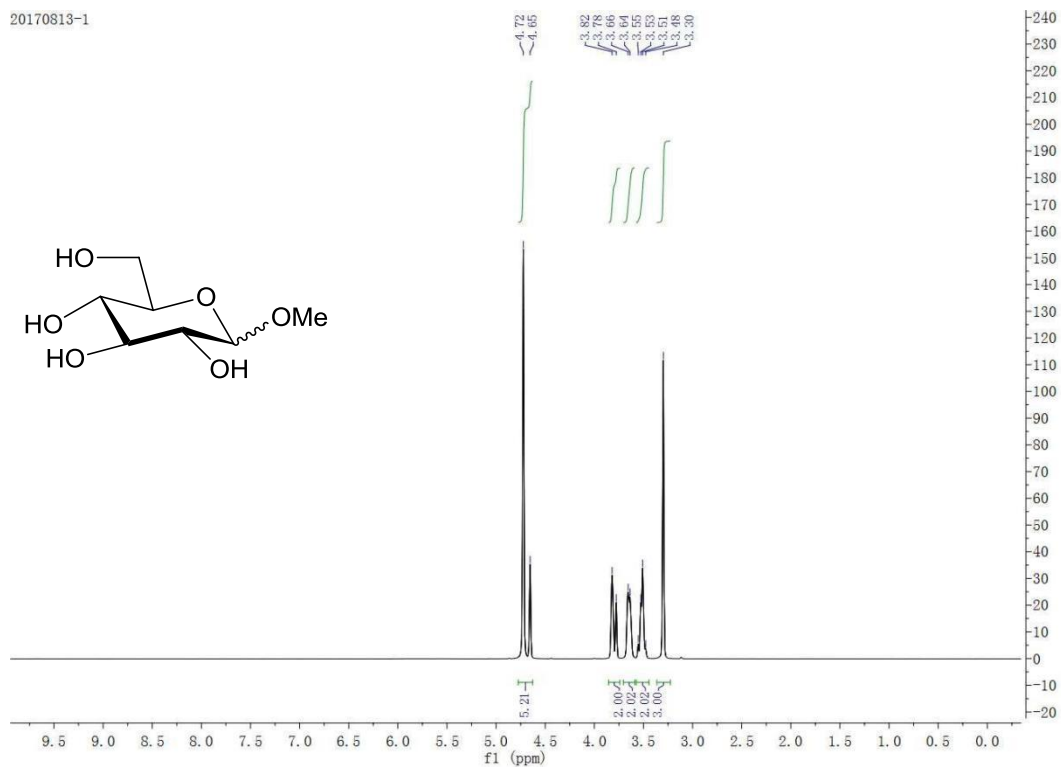**Figure S93:** <sup>1</sup>H NMR (400 MHz, D<sub>2</sub>O) of compound **8f**

8f

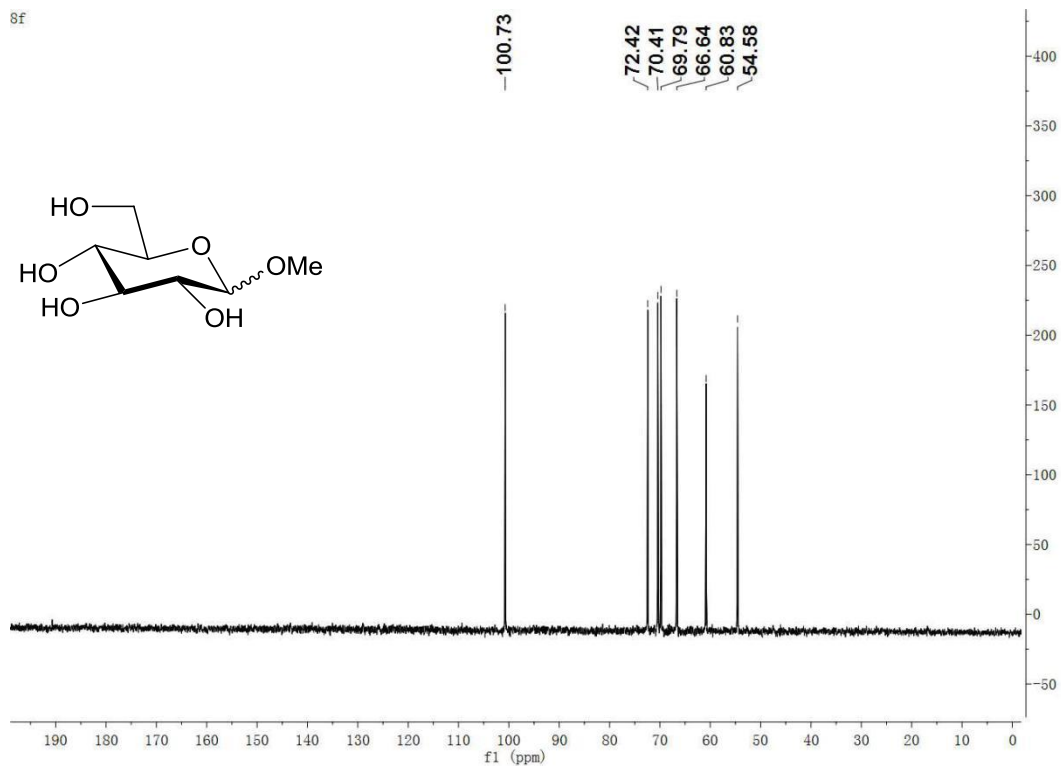**Figure S94:** <sup>13</sup>C NMR (100 MHz, D<sub>2</sub>O) of compound **8f**



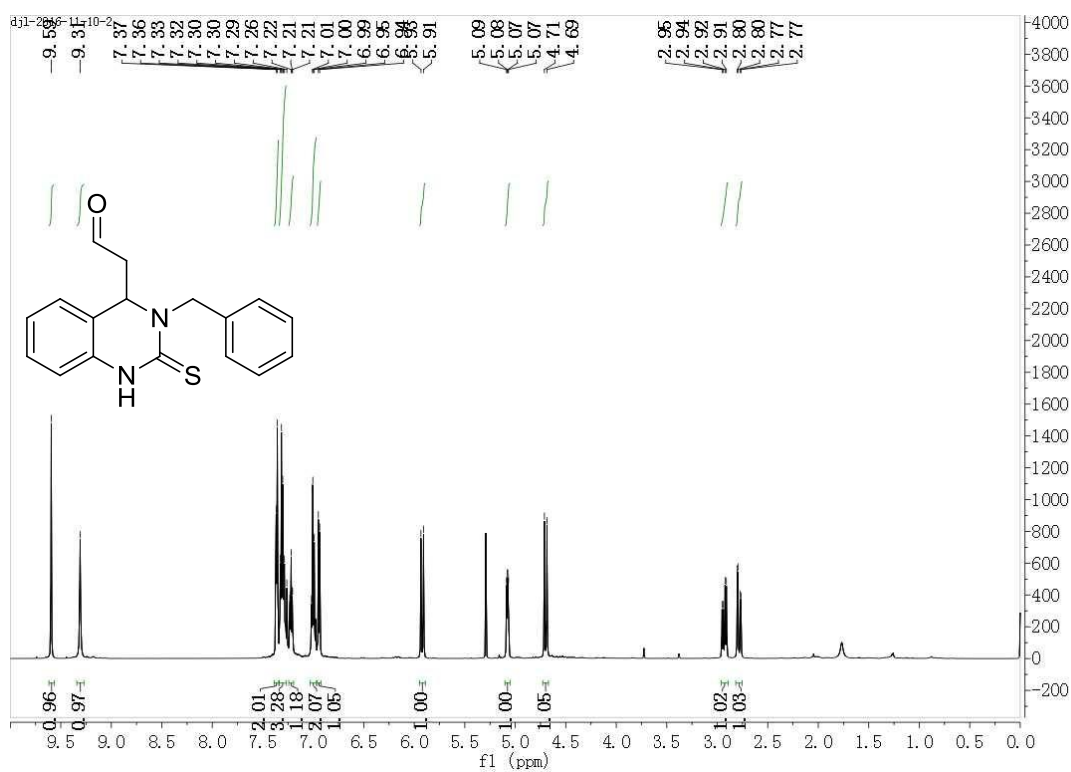

Figure S95:  $^1\text{H NMR}$  (600 MHz,  $\text{CDCl}_3$ ) of compound 10a

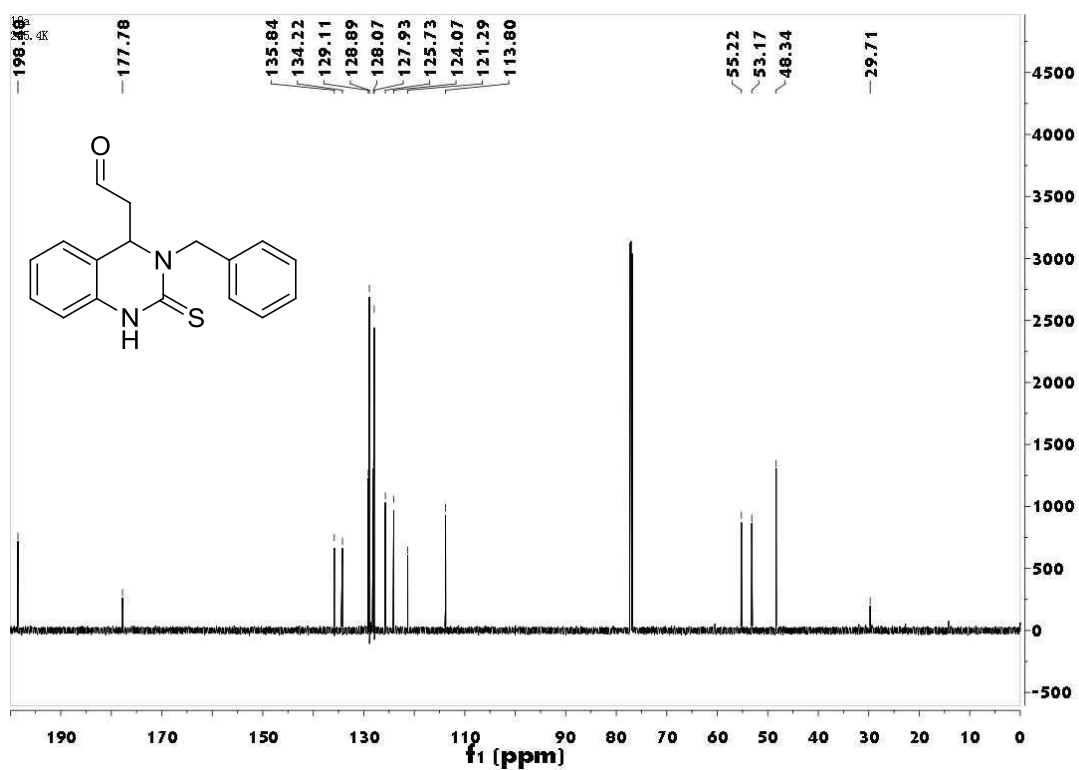

Figure S96:  $^{13}\text{C NMR}$  (151 MHz,  $\text{CDCl}_3$ ) of compound 10a

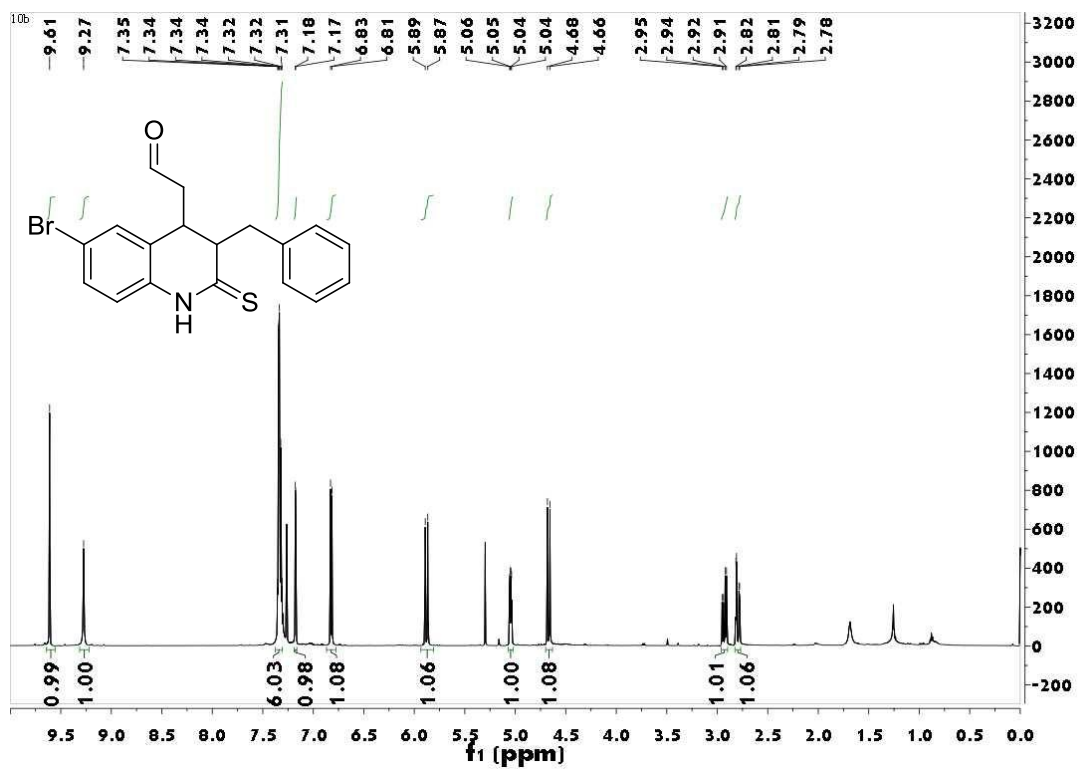

Figure S97:  $^1\text{H}$  NMR (600 MHz,  $\text{CDCl}_3$ ) of compound 10b

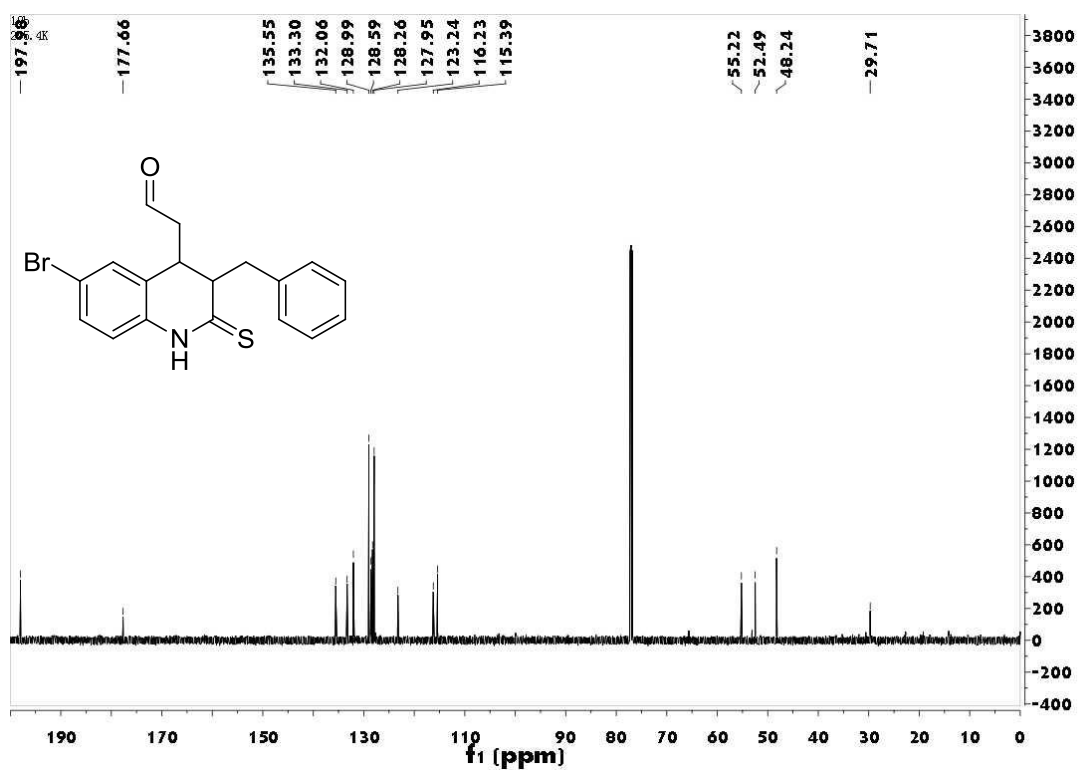

Figure S98:  $^{13}\text{C}$  NMR (151 MHz,  $\text{CDCl}_3$ ) of compound 10b

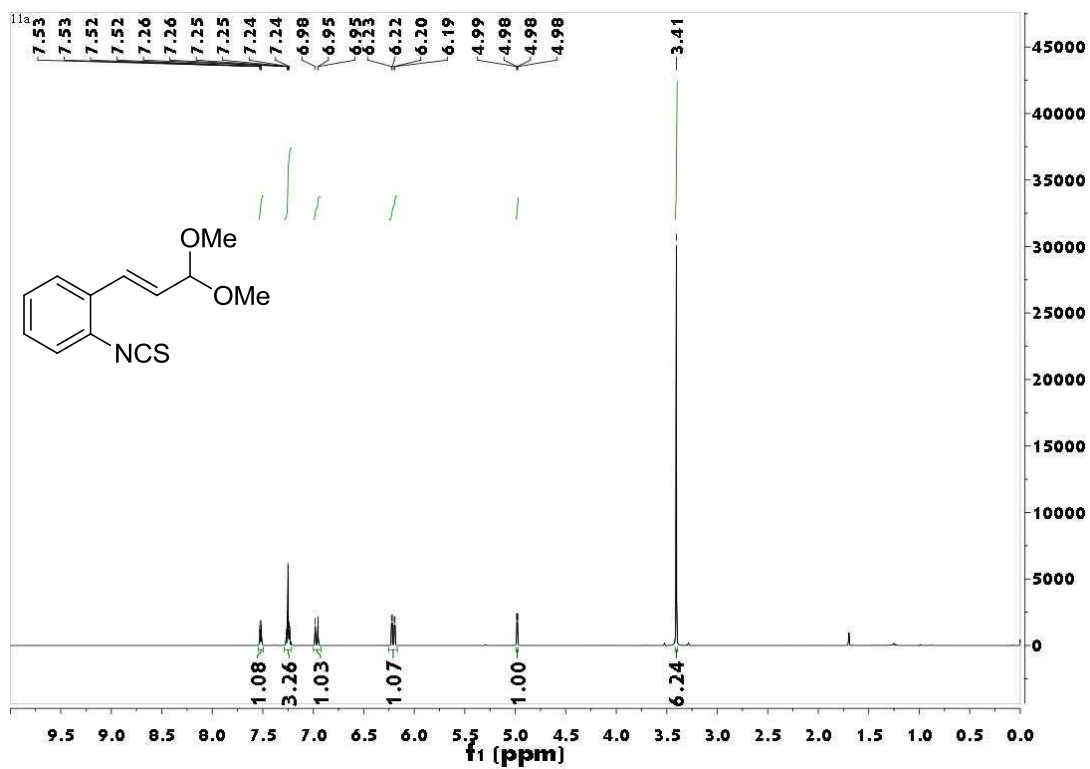

Figure S99:  $^1\text{H}$  NMR (600 MHz,  $\text{CDCl}_3$ ) of compound 11a

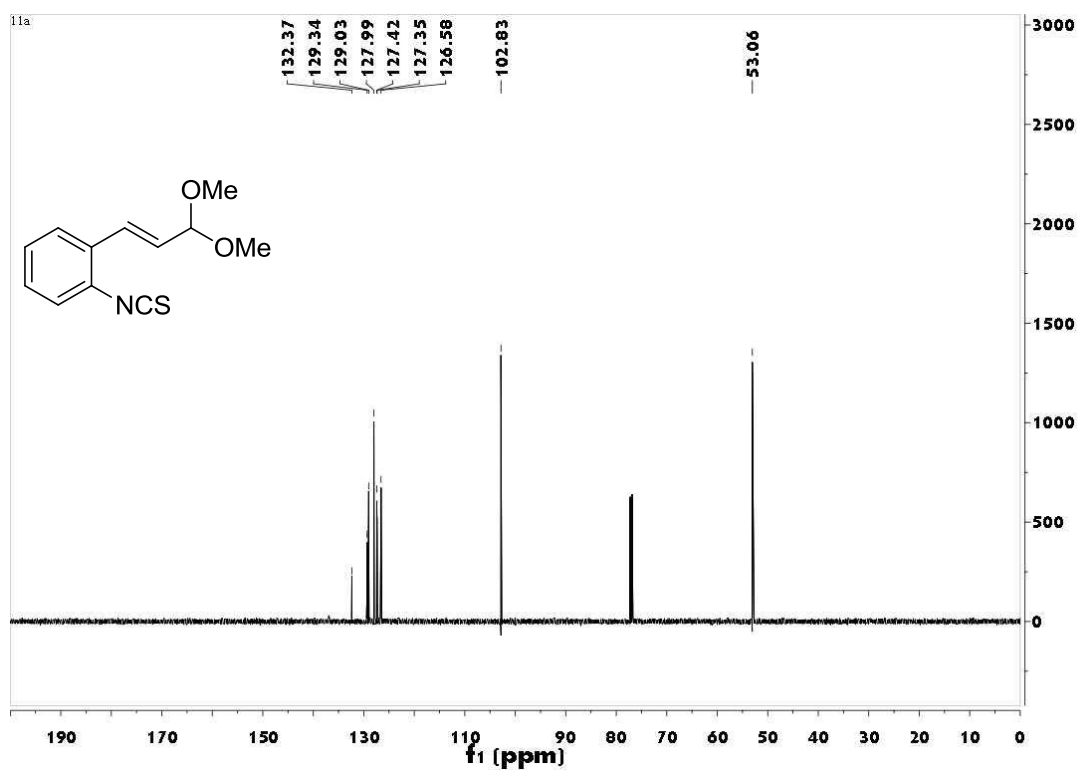

Figure S100:  $^{13}\text{C}$  NMR (151 MHz,  $\text{CDCl}_3$ ) of compound 11a

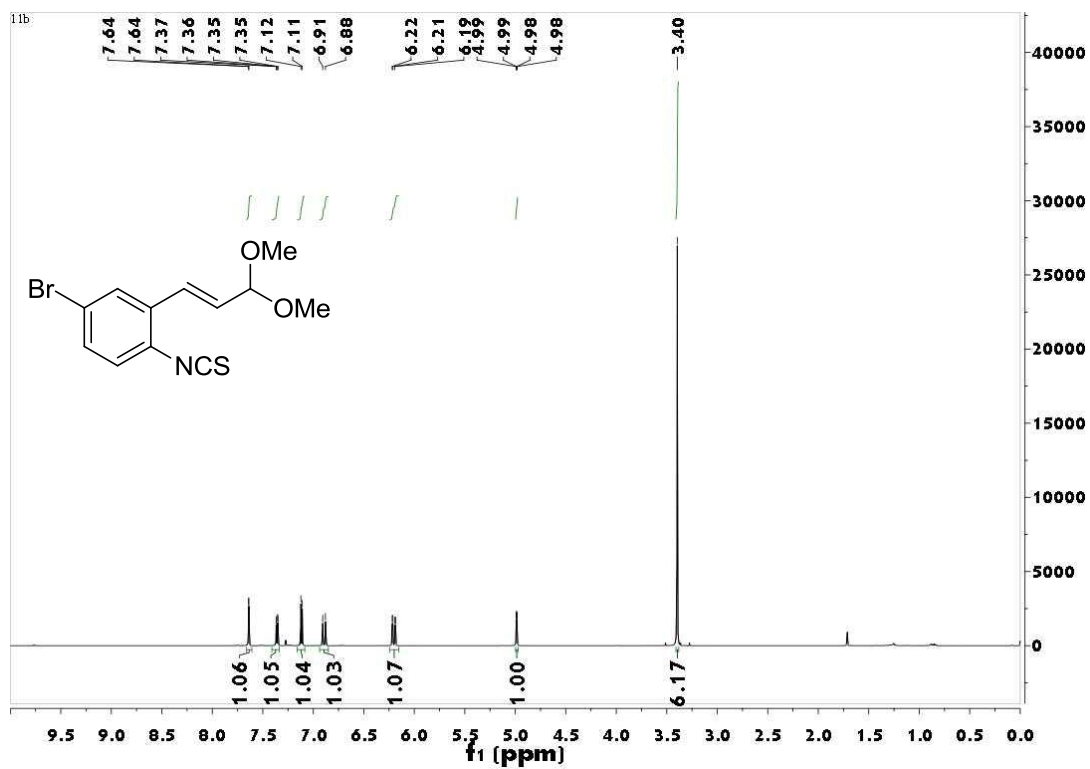

Figure S101:  $^1\text{H}$  NMR (600 MHz,  $\text{CDCl}_3$ ) of compound 11b

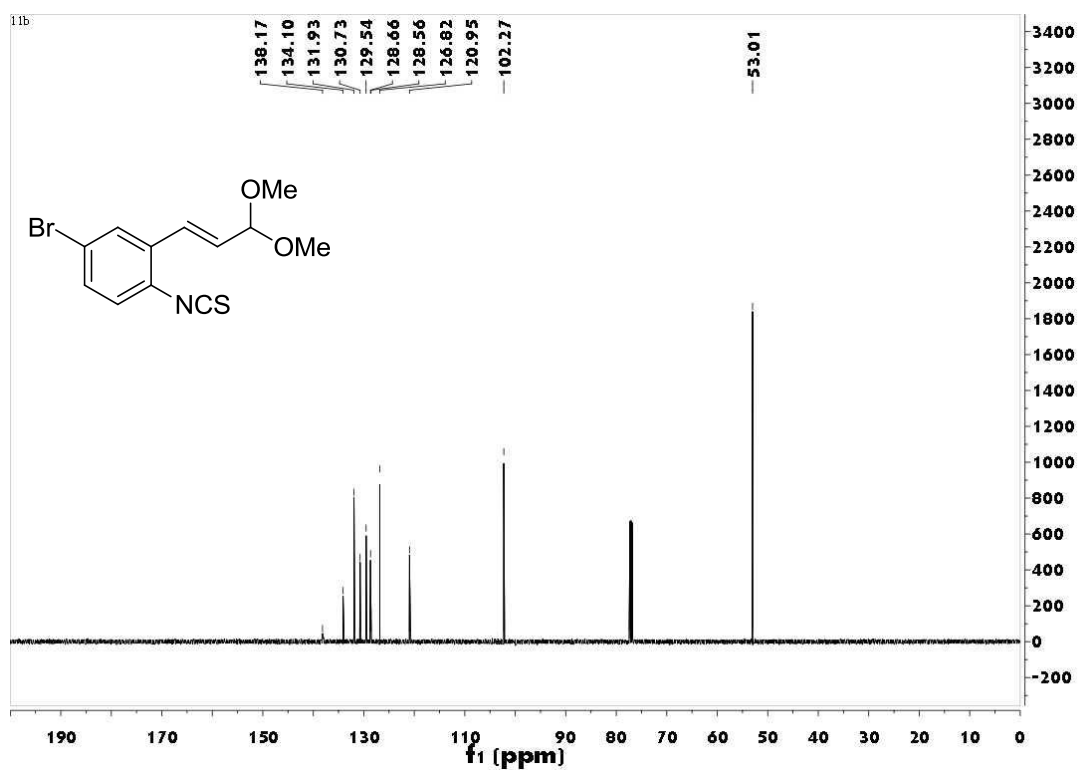

Figure S102:  $^{13}\text{C}$  NMR (151 MHz,  $\text{CDCl}_3$ ) of compound 11b

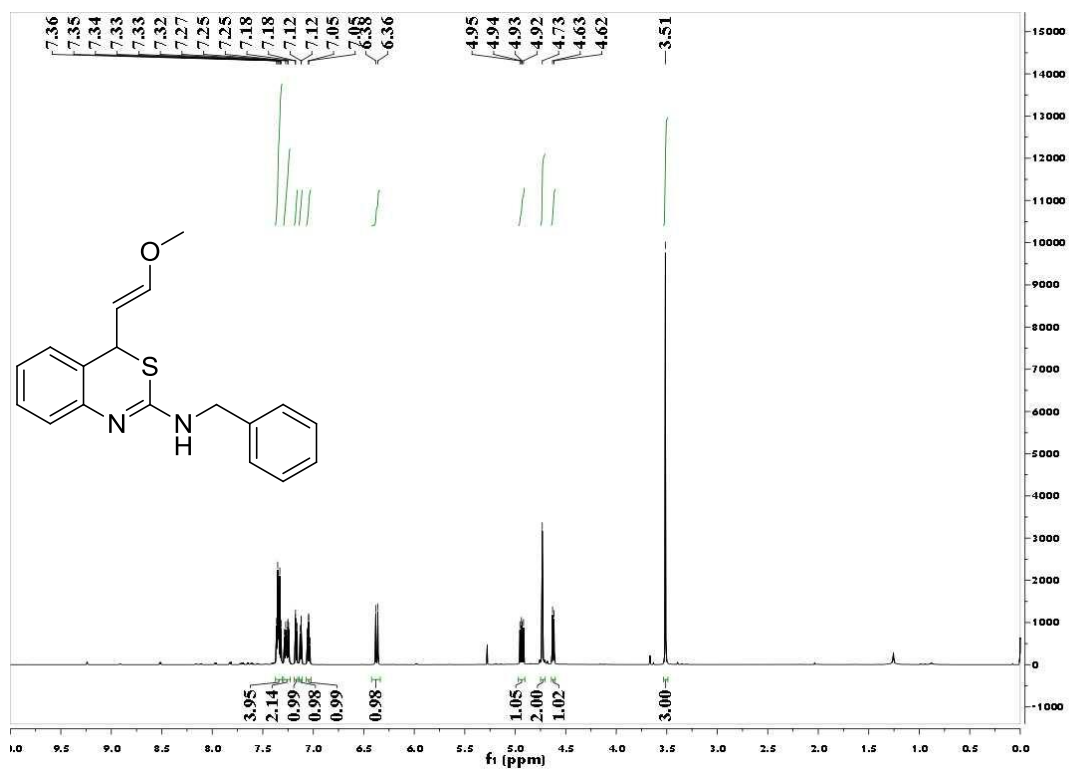

Figure S103:  $^1\text{H}$  NMR (600 MHz,  $\text{CDCl}_3$ ) of compound 12a

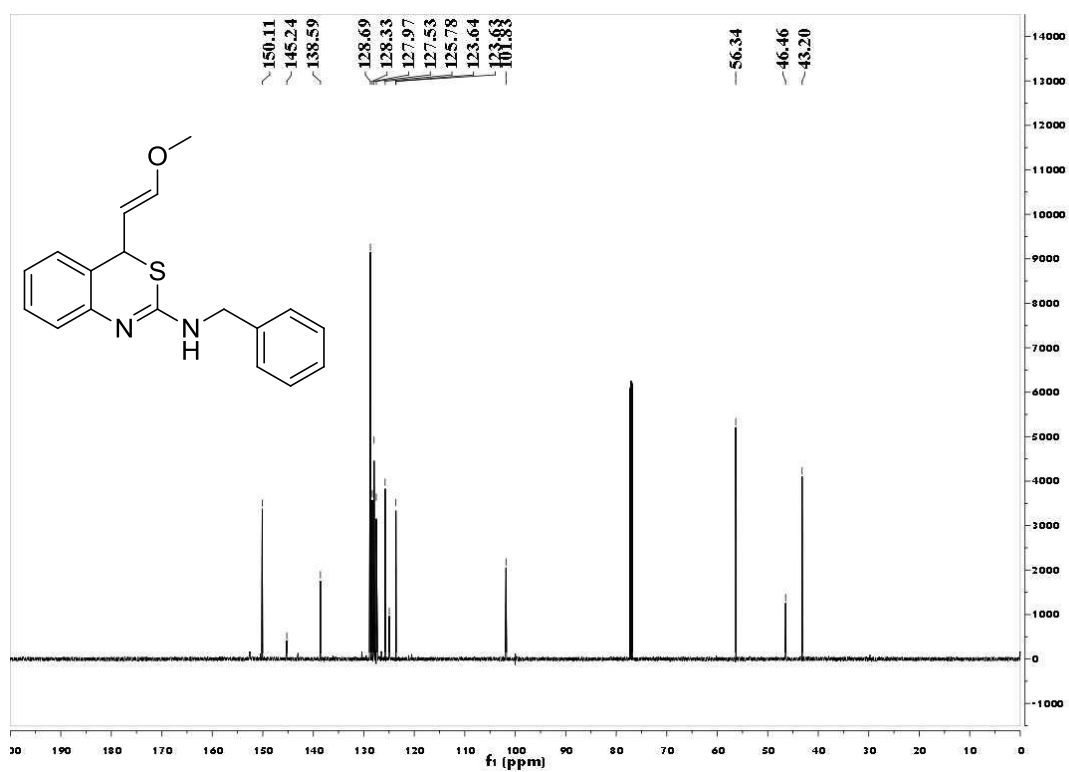

Figure S104:  $^{13}\text{C}$  NMR (151 MHz,  $\text{CDCl}_3$ ) of compound 12a

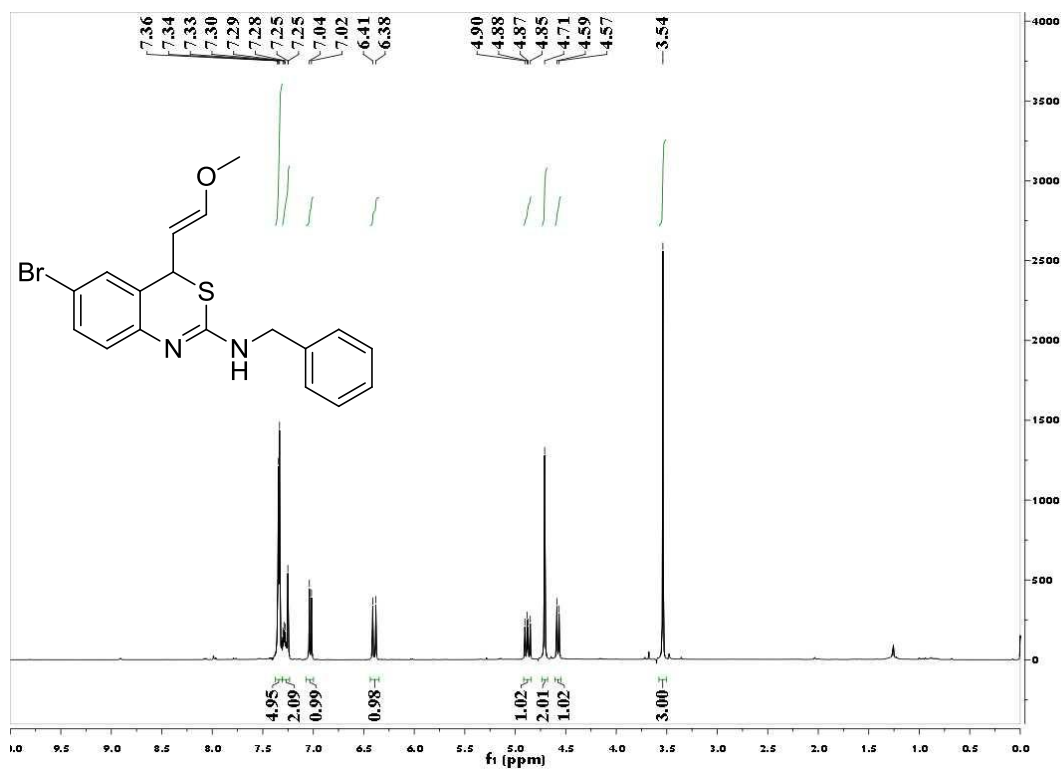

Figure S105:  $^1\text{H}$  NMR (400 MHz,  $\text{CDCl}_3$ ) of compound 12b

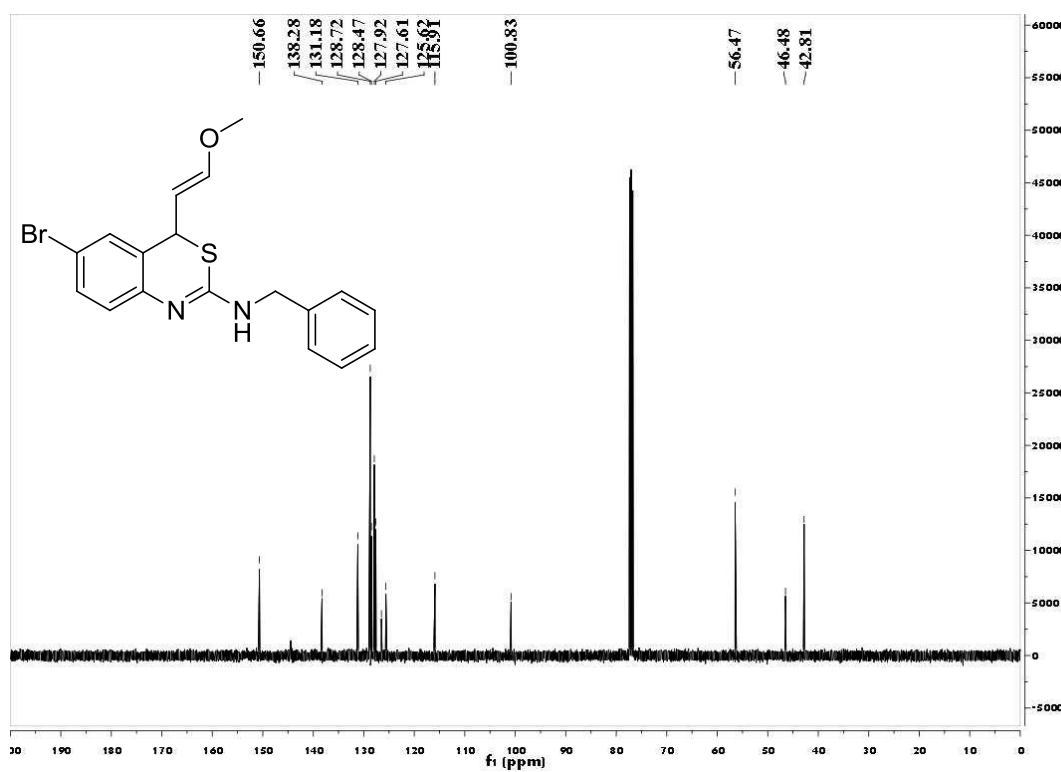

Figure S106:  $^{13}\text{C}$  NMR (100 MHz,  $\text{CDCl}_3$ ) of compound 12b
